# Supplementary material
Source: PubMed Central journal article supplement (PMC8316421)

# SUPPLEMENTAL MATERIAL

Spending on Cardiovascular Disease and Cardiovascular Risk Factors in the United States: 1996

– 2016

Maxwell Birger, Alexander S. Kaldjian, Gregory A. Roth, Andrew E. Moran, Joseph L. Dieleman,

Brandon K. Bellows

## Supplemental Table of Contents

|                                 |    |
|---------------------------------|----|
| 1) Supplemental Methods .....   | 2  |
| a. Data Sources.....            | 2  |
| b. Decomposition Analysis ..... | 6  |
| 2) Supplemental Tables .....    | 7  |
| 3) Supplemental Figures .....   | 81 |

## SUPPLEMENTAL METHODS

### Section 1: Data sources

The description of data sources below was drawn from prior studies.<sup>8-10</sup>

We used two data sources for this study. Health spending and volume data came from the Disease Expenditure (DEX) Project, produced by the Institute for Health Metrics and Evaluation. Epidemiologic data came from the Global Burden of Disease (GBD) 2017 study. We provide a brief overview of the methods used to produce the estimates and describe the alterations we made in detail.

#### Section 1A: Disease Expenditure data

The objective of the DEX project is to measure spending on healthcare in the United States, using granular, politically and clinically useful categories. In doing this, DEX provides estimates on US healthcare spending from 1996 through 2016, disaggregated into age-, sex-, type-of-care-, payer-, and year-specific categories, which when aggregated match the official US government estimates of spending, as reported in the National Health Expenditure Accounts (NHEA)<sup>42</sup>. These spending estimates are produced to reflect actual spending on health, also known as expenditure or payments, rather than charges made by medical providers. Spending estimates were adjusted for inflation using the economy-wide consumer price index (CPI) from the Bureau of Economic Analysis and were reported as 2016 dollars<sup>43</sup>. In addition to health spending, DEX also provides estimates on the volume of health goods or services received. Volume of health-related goods and services was measured as the number of visits, bed-days, or prescriptions filled.

The data used in generating DEX estimates were split into categories within four distinct frameworks: demography, epidemiology, type of good or service provided, and responsible payer.

1. **Demography:** Health spending and volume of goods and services were estimated separately for **each sex** across **19 age groups** (age 0, 1-4, 5-9, 10-14, ..., 80-84, and 85+ years).
2. **Epidemiology:** Health spending and volume of goods and services were estimated for 154 causes. The cause list for this project was based on the 140 causes from the GBD 2017 study<sup>15</sup>. An additional 17 causes were added to the DEX project to account for four risk factors, ten health conditions associated with spending but not burden, and three impairments that do not represent the underlying “causes” of health burden but rather are consequences of underlying causes. A description and full list of the 154 tracked “causes” and how they map to the International Classification of Disease 9<sup>th</sup> revision (ICD9) for years 1996 through 2015 and then to ICD 10<sup>th</sup> revision (ICD10) for year 2016 have been published elsewhere<sup>7</sup>.
3. **Types of goods or services:** Healthcare spending and volume of goods and services were estimated for **seven types of goods and services:** ambulatory care, inpatient care, emergency department care, long-term care, dental care, prescribed retail pharmaceuticals, general administration, and other. Definitions for these types of goods and services were designed to reflect the National Health Accounts (NHA) framework, which provides a taxonomy of categories (sometimes referred to as “functions”) that permit for international comparisons for how health care dollars are spent<sup>44</sup>. The US subscribes to the NHEA framework<sup>45</sup>, which has a slightly different taxonomy from the NHA. However, we disaggregated type of goods or services using the NHA framework because its taxonomy more clearly matches the types of goods of services we tracked.

- *Ambulatory care*: Ambulatory care included preventive, curative, and rehabilitative medical and psychiatric services, procedures, and medications provided in ambulatory care settings including physician’s offices, freestanding clinics and hospital outpatient departments. Emergency room visits and dental visits are excluded from ambulatory care. For ambulatory care, volume was measured as the number of visits.
- *Inpatient care*: Inpatient care included all spending in an inpatient hospital facility, whether preventive, curative, or rehabilitative, and included all medical goods, whether pharmaceuticals, diagnostics or devices, consumed by inpatients, regardless of their length of stay. For inpatient care, volume was measured as the number of days spent inpatient.
- *Emergency department care*: Emergency department care included curative and rehabilitative medical and psychiatric care provided at hospital-based emergency departments. We leveraged the Nationwide Emergency Department Sample (NEDS), the largest all-payer emergency department database that allows for national estimates of hospital-based ED visits, to capture both volume – measured as the total number of ED encounters – and spending. Emergency department care is not a distinct category in the NHEA. As a result, we leveraged the Medical Expenditure Panel Survey (MEPS) to parse out spending dollars from the NHEA categories of “physician” and “hospital” fractions to attribute to our emergency department care category. See Section 5 for more detail.
- *Nursing facility care*: Nursing facility care included nursing care provided in nursing homes or other residential institutions. Home-based care and palliative or hospice care provided in inpatient settings were excluded. For nursing facility care, volume was measured as the number of days spent in a nursing facility.
- *Dental care*: Dental care included preventative and curative health care at a dental facility. For dental care, volume was measured as the number of visits to a dental facility.
- *Prescribed retail pharmaceuticals*: Prescribed retail pharmaceuticals included all prescription medicines purchased in a retail pharmacy setting. This category excluded any medications consumed in inpatient, ambulatory, long-term and emergency settings during a visit. It also excluded over-the-counter (non-prescribed) medications and therapeutic devices. For prescribed retail pharmaceuticals, volume was measured as the number of prescriptions filled. The cause of illness is captured by the diagnoses reported by an individual who held the prescription, not by an Anatomical Therapeutic Chemical (ATC) classification system or medication code. An adjustment was made to this category to account for specialty drugs, which may be used infrequently but are expensive, resulting in larger estimates of spending than if data were only collected from MEPS.
- *General administration and net cost of insurance*: Administrative costs (such as health system governance costs and administrative costs borne by public and private insurance companies) were disaggregated by age, sex, year, and cause. There were no out-of-payment costs associated with general administration. Given the nature of this category, volume was not measured.
- *Other*: Other types of goods and services includes all over-the-counter (non-prescribed) pharmaceuticals, other retail medical durables (such as eye glasses and hearing aids), and non-medical retail durables (such as bandages). This category was not disaggregated by age, sex, or cause. Volume was not measured for this category.

4. **Payer:** Payments were made by either public insurance, private insurance, or out-of-pocket. Public insurance includes payments made by the government through programs such as by Medicare and Medicaid. Private insurance included those handled by private insurance companies, such as those provided by employers, and includes spending on insurance premiums. Out-of-pocket payments were those paid by the patients themselves or their families. These three payer groups were mutually exclusive and collectively exhaustive. For five of the seven types of care (inpatient, outpatient, ambulatory, dental, and emergency), data used for splitting spending by payer category was from the MEPS data sets. For nursing facility care, data from the Medicare Current Beneficiaries Survey (MCBS) was used to split spending across the three payer categories

Supplemental Table I provides a list of the primary data sources used in DEX. Supplemental Table II provides a broad overview of the DEX methodology. This methodology includes statistical models to generate a complete set of estimates, combine data sources, and adjust the data for known biases, as well as scaling the population-weighted estimates derived from the microestimates to reflect the total health expenditure for each type of care and year as documented in the NHEA. The methods used have been thoroughly vetted elsewhere and details can be found in the initial sources<sup>8</sup>.

### **Section 1B: Global Burden of Disease data**

The Global Burden of Disease study contains comprehensive estimates for disease burden for every country of the world. It contains information about mortality for 282 causes of death, morbidity for 354 diseases and injuries, and the morbidity and mortality attributed to over 84 risk factors. Estimates are made at global, national, and subnational levels and, while available at a more granular level than DEX estimates, can be aggregated into the same demographic and epidemiologic categories. Detailed methods for the GBD study<sup>17</sup>.

### **Section 1C: Focusing on cardiovascular disease and cardiovascular risk factors**

In this study, we extracted DEX spending and volume data and GBD prevalence data on ten cardiovascular disease health conditions (ischemic heart disease, cerebrovascular disease, atrial fibrillation/flutter, endocarditis, peripheral arterial disease, aortic aneurysm, rheumatic heart disease, cardiomyopathy, hypertensive heart disease, and an “other heart disease” category that includes predominantly non-rheumatic vascular disease), two cardiovascular risk factors (hypertension and hyperlipidemia), and the impairment that is heart failure. While DEX provides separate spending estimates for hypertensive heart disease, cardiomyopathy, and heart failure – this decision was made to match the GBD schema, which separately estimates sequelae and causes of mortality and morbidity – we aggregated spending estimates for these three causes of spending and listed them under the title of “heart failure.” We made this decision because the phrases “cardiomyopathy,” “hypertensive heart disease,” and “heart failure” are often used interchangeably in the clinical setting (ICD-9 codes in Supplemental Table III; asterisks indicate potential misattribution to heart failure in this study). GBD estimates the prevalence of sequelae separately from the prevalence of causes of morbidity and mortality, so this error is not present in the epidemiologic data. The ICD-9 and ICD-10 codes we used for these causes are listed in Supplemental Tables 4 and 5.

We also focus on adult cardiovascular spending only in this study, and in doing so we exclude estimates of cardiovascular spending on those younger than twenty years of age. We exclude the DEX estimates for general administration and net cost of insurance as well, as we are only interested in the dollars spent directly on the treatment of cardiovascular disease and cardiovascular risk factors.

## Section 2: Decomposition Analysis

The description of the decomposition analysis below was drawn from prior studies.<sup>10</sup>

We used the decomposition method described by Das Gupta and used by Dieleman et al. to decompose the contribution of each of the five factors to changes in health spending<sup>10,19</sup>. This method is based on the calculation of standardized rates in order to eliminate the compositional effects of all other factors in different years. Our data structure enabled the use of this method, since the outcome variable (spending) is the product of the five factors of interest. We calculate standardized rates for each factor by considering all possible combinations of other factors across time. For example, if only considering two factors, utilization (U) and price (P), and two years, 1996 and 2016, the price-standardized rate in each year would be:

$$1996 \text{ Price standardized rate: } \frac{P_{2016} + P_{1996}}{2} U_{1996}$$

$$2016 \text{ Price standardized rate: } \frac{P_{2016} + P_{1996}}{2} U_{2016}$$

The difference between the 1996 price-standardized rate and the 2016 price-standardized rate is the effect of utilization, or the contribution of utilization to changes in the outcome between 1996 and 2016 (below equation).

$$\text{Effect of Utilization} = \frac{P_{2016} + P_{1996}}{2} (U_{2016} - U_{1996})$$

The decomposition for our purposes was performed using the expanded 5-factor equation with calculations adjusted to ensure internal consistency, described elsewhere<sup>46</sup>. The decomposition was completed for each of the condition, age and sex, and type of care stratified groups, and for every possible combination of years (an input into the equation which accounts for multiple populations, as described by Das Gupta)<sup>46</sup>. The impact of each driver can be aggregated to assess the impact of the driver for any condition, age and sex group, or type of care of interest. To calculate uncertainty, we performed the decomposition analysis 1,000 times for each of the 1,000 draws of input data. An outlier detection was conducted in order to stabilize the final decomposition estimates. For each driver and type of care, we compute modified z-score, where:

$$\text{Modified } z - \text{score} = \frac{X_{f,e,d} + \text{median}(X_{f,e})}{\text{MAD}(X_{f,e})} * 0.6745$$

where  $f$  is a specific function,  $e$  is a specific driver, and  $d$  is a draw. Using the threshold defined in Iglewics and Hoaglin (1993)<sup>47</sup>, the maximum modified z-score of each draw was computed and was dropped if the absolute computed value within the draw exceeded 3.5. This resulted in 109 of the 1,000 draws being dropped. The point estimate reported is the mean of the remaining 891 draws, while the uncertainty interval is the 2.5th and 97.5th percentile of the full set of 1,000 draws. The results are largely robust to excluding these outliers. When collapsing across cardiovascular cause and type of care, the average difference between the point estimate when including the outliers and when excluding them was \$17.6 million USD, or 1.3% of the point estimate reported in the paper.

Spending on aortic aneurysms was excluded from the decomposition analysis, because GBD provides mortality estimates and not prevalence estimates for this cause. Nursing facility care was excluded from the decomposition analysis, because these estimates were not available at the time of analysis.

## SUPPLEMENTAL TABLES

**Supplemental Table I List of primary sources**

| Type of care                      | Macro spending data and years | Micro spending data and years                                                                                                                                                                     | Micro volume data and years                                                                                                                                                    |
|-----------------------------------|-------------------------------|---------------------------------------------------------------------------------------------------------------------------------------------------------------------------------------------------|--------------------------------------------------------------------------------------------------------------------------------------------------------------------------------|
| Ambulatory                        | NHEA (1996 – 2016)            | MEPS (1996 – 2016); SAMHSA (1998, 2002, 2004, 2005, 2009); MarketScan (2000, 2010 – 2015)                                                                                                         | NAMCS (1996 – 2015); MarketScan (2000, 2010 - 2015)                                                                                                                            |
| Inpatient                         | NHEA (1996 – 2016)            | NIS (1996 – 2016); MEPS (1996 – 2016), SAMHSA (1998, 2002, 2004, 2005, 2009); MarketScan (2000, 2010 - 2015)                                                                                      | NIS (1996 – 2016); MarketScan (2000, 2010 - 2015)                                                                                                                              |
| Emergency Department              | NHEA (1996 – 2016)            | NEDS (2006 – 2013; 2015-2016)<br>MEPS (1996 – 2016);                                                                                                                                              | NEDS (2006 – 2013; 2015-2016)<br>MarketScan (2000, 2010-2015)                                                                                                                  |
| Nursing care                      | NHEA (1996 – 2016)            | Medicare claims data (1999 – 2002, 2004, 2006, 2008, 2010, 2012, 2014, 2016); NNHS (1997, 1999, 2004); Medicaid (2000-2005, 2008, 2011, 2013); MarketScan (2000, 2010 - 2015); MCBS (1999 - 2012) | Medicare claims data (1999 – 2002, 2004, 2006, 2008, 2010, 2012, 2014, 2016); NNHS (1997, 1999, 2004); Medicaid (2000-2005, 2008, 2011, 2013); MarketScan (2000, 2010 - 2015); |
| Dental                            | NHEA (1996 – 2016)            | MEPS (1996 – 2016)                                                                                                                                                                                | MEPS (1996 – 2016)                                                                                                                                                             |
| Prescribed retail pharmaceuticals | NHEA (1996 – 2016)            | MEPS (1996 – 2016)<br>MarketScan (2000, 2010 - 2015)                                                                                                                                              | MEPS (1996 – 2016)                                                                                                                                                             |
| Specialty drugs                   | NHEA (1996 – 2016)            | IQVIA specialty drug list (2010-2018)                                                                                                                                                             | IQVIA specialty drug list (2010-2018)                                                                                                                                          |

**Supplemental Table II Summary of steps taken to get to final DEX estimates**

| Step                 | Types of care                                                                                                 | Motivation                                                                                                                                                  | Effect                                                                                                                              |
|----------------------|---------------------------------------------------------------------------------------------------------------|-------------------------------------------------------------------------------------------------------------------------------------------------------------|-------------------------------------------------------------------------------------------------------------------------------------|
| <b>Format data</b>   | Ambulatory, inpatient, emergency department, nursing care, dental, prescribed retail pharmaceuticals          | To enable all data sources to go through same statistical machinery                                                                                         | All data were structured in the same manner, and variable names and variable formats were systematized across all data sources used |
| <b>Bootstrap</b>     | Ambulatory, inpatient, emergency department, nursing care, dental, prescribed retail pharmaceuticals          | To obtain 1,000 bootstrap samples upon which all other steps could be run independently, in order to quantify uncertainty                                   | 1,000 samples were created for analysis based on survey-adjusted bootstrapping methods                                              |
| <b>De-truncation</b> | Ambulatory (spending data only), emergency department (spending data only), prescribed retail pharmaceuticals | To estimate more detailed four and five-digit ICD-9 and ICD-10 diagnoses from the three-digit diagnoses recorded in Medical Expenditure Panel Survey (MEPS) | Variation within each bootstrap draw and across draws for data from MEPS was increased                                              |



|                          |                                                                                                      |                                                                                                                                                  |                                                                                                                                                                                                                                                                                                                                                                                                                                                                                                      |
|--------------------------|------------------------------------------------------------------------------------------------------|--------------------------------------------------------------------------------------------------------------------------------------------------|------------------------------------------------------------------------------------------------------------------------------------------------------------------------------------------------------------------------------------------------------------------------------------------------------------------------------------------------------------------------------------------------------------------------------------------------------------------------------------------------------|
| <b>Redistribution</b>    | Ambulatory, inpatient, emergency department, nursing care, prescribed retail pharmaceuticals         | To attribute all spending and volumes to causes that represent the true underlying reason for a health care encounter                            | Spending and volume originally attributed to ICD-9 and ICD-10 codes that do not map to GBD causes were assigned to GBD causes based on redistribution packages developed by the IHME GBD research. This redistribution was designed to take into account age and sex. While each cause is impacted differently by the redistribution process, spending per cause, measured at the age, sex, type, and year level, goes up or stays the same, while spending attributed to “garbage codes” is removed |
| <b>Mapping</b>           | Ambulatory, inpatient, emergency department, nursing care, dental, prescribed retail pharmaceuticals | To divide spending into 158 medically important and policyrelevant categories                                                                    | Causes were aggregated from ICD-9 codes to 154 GBD causes, leading to more data for each cause-, year-, age-, sex-, typecombination                                                                                                                                                                                                                                                                                                                                                                  |
| <b>Injury adjustment</b> | Ambulatory, inpatient, emergency department, nursing care, prescribed retail pharmaceuticals         | To have all spending and volume due to injuries be defined by external cause of injury codes, rather than less actionable nature of injury codes | All spending attributed to injuries was defined by the external cause of injury                                                                                                                                                                                                                                                                                                                                                                                                                      |

|                                                                          |                                                                                              |                                                                                                                                                                 |                                                                                                                                                                                                                                            |
|--------------------------------------------------------------------------|----------------------------------------------------------------------------------------------|-----------------------------------------------------------------------------------------------------------------------------------------------------------------|--------------------------------------------------------------------------------------------------------------------------------------------------------------------------------------------------------------------------------------------|
| <b>Comorbidity adjustment</b>                                            | Ambulatory, inpatient, emergency department, nursing care, prescribed retail pharmaceuticals | To redistribute resources toward the underlying cause of the health care spending, rather than merely the primary diagnosis                                     | Spending was moved from some causes to others, based on whether, on average, the cause leads to excess spending (as comorbidity) or is a primary diagnosis that has spending increased by excess spending on comorbidities                 |
| <b>Age-splitting</b>                                                     | Nursing care                                                                                 | To have Medicare nursing care claims data be consistent with all other data sources, as Medicare aggregates younger ages to ensure patient privacy              | Charges captured in Medicare claims were split up from larger age bins into the age bins used in the study                                                                                                                                 |
| <b>Inpatient and emergency department charges-to-payments adjustment</b> | Inpatient, emergency department                                                              | To estimate total inpatient spending from the inpatient facility charges report in the National Inpatient Sample and the Nationwide Emergency Department Sample | Inpatient and emergency department spending estimates were made smaller than originally reported in National Inpatient Sample and Nationwide Emergency Sample, respectively, based on cause, year, payer-specific payment to charge ratios |
| <b>Ambulatory physician visits to total visits</b>                       | Ambulatory                                                                                   | To estimate the total number of ambulatory visits from the National Ambulatory Medical Care Survey, which does not include non-physician visits.                | Ambulatory visit estimates were made larger than originally reported in the National Ambulatory Medical Care Survey, based on cause, age, sex, and year physician physician visit to total ambulatory visit ratios                         |

|                                                                  |                                                                                                      |                                                                                                                                                                                                             |                                                                                                                                                                                                               |
|------------------------------------------------------------------|------------------------------------------------------------------------------------------------------|-------------------------------------------------------------------------------------------------------------------------------------------------------------------------------------------------------------|---------------------------------------------------------------------------------------------------------------------------------------------------------------------------------------------------------------|
| <b>Emergency department hospitalization encounter adjustment</b> | Emergency department                                                                                 | To disentangle the spending on emergency department care from the spending on inpatient care for patients who are admitted to the hospital through the emergency department                                 | Emergency department spending estimates are larger than originally reported in the Medical Expenditure Panel Survey, and inpatient spending is less than originally reported in the National Inpatient Sample |
| <b>Completing the series</b>                                     | Ambulatory, inpatient, emergency department, nursing care, dental, prescribed retail pharmaceuticals | To have estimates for years in which data do not exist, to obtain estimates for spending that are missed due to survey designs, and to have estimates that are appropriately consistent across age and time | Multiple data sources were combined to leverage strengths across data sources, such that every type-, age-, year-, cause-, and sex-combination was estimated and “smooth” series were produced                |
| <b>Nursing-care adjustment</b>                                   | Nursing care                                                                                         | To estimate nationally representative spending and volume estimates for short- and long-term stays at nursing homes                                                                                         | Three data sources were leveraged together, two using linear regression, to create nationally representative spending and volume estimates for short-term and long-term nursing facility care                 |

|                                  |                                                                                                      |                                                                                                                                                                                                                                 |                                                                                                                                                                                                                                                                            |
|----------------------------------|------------------------------------------------------------------------------------------------------|---------------------------------------------------------------------------------------------------------------------------------------------------------------------------------------------------------------------------------|----------------------------------------------------------------------------------------------------------------------------------------------------------------------------------------------------------------------------------------------------------------------------|
| <b>Specialty drug adjustment</b> | Prescribed retail pharmaceuticals                                                                    | To address the undersampling of people who spend large amounts on specialty drugs for rare conditions in the Medical Expenditure Panel Survey                                                                                   | Specialty drug spending data were collected from pharmaceutical consulting firms to provide more accurate estimates of prescribed retail pharmaceutical spending. These new spending estimates are larger than originally reported in the Medical Expenditure Panel Survey |
| <b>Mental Health adjustment</b>  | Ambulatory, inpatient                                                                                | To address the undersampling of mental health and substance abuse specialty facilities and create mental health and substance abuse health care spending aggregates that are commensurate with official US government estimates | Spending and volume on mental illnesses were increased, relative to non-mental illness causes, for the ambulatory and inpatient types of care                                                                                                                              |
| <b>Scaling</b>                   | Ambulatory, inpatient, emergency department, nursing care, dental, prescribed retail pharmaceuticals | To match spending estimates that reflect the official US government numbers, as no data source offers complete census of health care spending                                                                                   | Estimates for spending were increased or decreased depending on type of care                                                                                                                                                                                               |
| <b>Payer-Specific Estimates</b>  | Ambulatory, inpatient, emergency department, nursing care, dental, prescribed retail pharmaceuticals | To divide spending into three payers: private insurance, public insurance, and out-of-pocket                                                                                                                                    | Regression analysis of data from the Medical Expenditure Panel Survey to produce cause-, age-, and year-specific payer ratios used to produce payer-specific estimates                                                                                                     |

**Supplemental Table III DEX Causes Being Assigned to Heart Failure**

| DEX Cause      | ICD-9 Code | ICD-9 Name                                            |
|----------------|------------|-------------------------------------------------------|
| Cardiomyopathy | 742        | Coxsackie carditis*                                   |
| Cardiomyopathy | 7423       | Coxsackie myocarditis*                                |
| Cardiomyopathy | 422        | Acute myocarditis                                     |
| Cardiomyopathy | 4220       | Acute myocarditis in diseases classified elsewhere    |
| Cardiomyopathy | 4224       | Other acute myocarditis                               |
| Cardiomyopathy | 4225       | Acute myocarditis in diseases classified elsewhere    |
| Cardiomyopathy | 4229       | Other and unspecified acute myocarditis               |
| Cardiomyopathy | 42290      | Acute myocarditis, unspecified                        |
| Cardiomyopathy | 42291      | Idiopathic myocarditis                                |
| Cardiomyopathy | 42292      | Septic myocarditis                                    |
| Cardiomyopathy | 42293      | Toxic myocarditis                                     |
| Cardiomyopathy | 42299      | Other acute myocarditis                               |
| Cardiomyopathy | 425        | Cardiomyopathy                                        |
| Cardiomyopathy | 4250       | Endomyocardial fibrosis                               |
| Cardiomyopathy | 4251       | Hypertrophic cardiomyopathy                           |
| Cardiomyopathy | 42511      | Hypertrophic obstructive cardiomyopathy               |
| Cardiomyopathy | 42518      | Other hypertrophic cardiomyopathy                     |
| Cardiomyopathy | 4252       | Obscure cardiomyopathy of Africa                      |
| Cardiomyopathy | 4253       | Endocardial fibroelastosis                            |
| Cardiomyopathy | 4254       | Other primary cardiomyopathies                        |
| Cardiomyopathy | 4255       | Alcoholic cardiomyopathy                              |
| Cardiomyopathy | 4257       | Nutritional and metabolic cardiomyopathy              |
| Cardiomyopathy | 4258       | Cardiomyopathy in other diseases classified elsewhere |
| Cardiomyopathy | 4259       | Secondary cardiomyopathy, unspecified                 |
| Cardiomyopathy | 4290       | Myocarditis, unspecified*                             |
| Cardiomyopathy | 4291       | Myocardial degeneration*                              |
| Heart Failure  | 416        | Chronic pulmonary heart disease                       |
| Heart Failure  | 4160       | Primary pulmonary hypertension                        |
| Heart Failure  | 4162       | Chronic pulmonary embolism                            |
| Heart Failure  | 4163       | Chronic pulmonary heart disease unspecified           |
| Heart Failure  | 4168       | Other chronic pulmonary heart diseases                |
| Heart Failure  | 4169       | Chronic pulmonary heart disease unspecified           |
| Heart Failure  | 428        | Heart failure                                         |
| Heart Failure  | 4280       | Congestive heart failure, unspecified                 |
| Heart Failure  | 4281       | Left heart failure                                    |
| Heart Failure  | 4282       | Systolic heart failure                                |
| Heart Failure  | 42820      | Heart failure unspecified                             |
| Heart Failure  | 42821      | Acute systolic heart failure                          |
| Heart Failure  | 42822      | Chronic systolic heart failure                        |
| Heart Failure  | 42823      | Acute on chronic systolic heart failure               |

|                            |       |                                                                |
|----------------------------|-------|----------------------------------------------------------------|
| Heart Failure              | 4283  | Diastolic heart failure                                        |
| Heart Failure              | 42830 | Heart failure unspecified                                      |
| Heart Failure              | 42831 | Acute diastolic heart failure                                  |
| Heart Failure              | 42832 | Chronic diastolic heart failure                                |
| Heart Failure              | 42833 | Acute on chronic diastolic heart failure                       |
| Heart Failure              | 4284  | Combined systolic and diastolic heart failure                  |
| Heart Failure              | 42840 | Heart failure unspecified                                      |
| Heart Failure              | 42841 | Acute combined systolic and diastolic heart failure            |
| Heart Failure              | 42842 | Chronic combined systolic and diastolic heart failure          |
| Heart Failure              | 42843 | Acute on chronic combined systolic and diastolic heart failure |
| Heart Failure              | 4286  | Heart failure unspecified                                      |
| Heart Failure              | 4287  | Heart failure unspecified                                      |
| Heart Failure              | 4288  | Heart failure unspecified                                      |
| Heart Failure              | 4289  | Heart failure unspecified                                      |
| Hypertensive Heart Disease | 402   | Hypertensive heart disease                                     |
| Hypertensive Heart Disease | 4020  | Malignant hypertensive heart disease*                          |
| Hypertensive Heart Disease | 40200 | Hypertensive heart disease without heart failure*              |
| Hypertensive Heart Disease | 40201 | Hypertensive heart disease with heart failure                  |
| Hypertensive Heart Disease | 4021  | Benign hypertensive heart disease*                             |
| Hypertensive Heart Disease | 40210 | Hypertensive heart disease without heart failure*              |
| Hypertensive Heart Disease | 40211 | Hypertensive heart disease with heart failure                  |
| Hypertensive Heart Disease | 4023  | With congestive heart failure                                  |
| Hypertensive Heart Disease | 4027  | Hypertensive heart disease with heart failure                  |
| Hypertensive Heart Disease | 4029  | Unspecified hypertensive heart disease                         |
| Hypertensive Heart Disease | 40290 | Hypertensive heart disease without heart failure*              |
| Hypertensive Heart Disease | 40291 | Hypertensive heart disease with heart failure                  |

\* indicate potential misattribution to heart failure in this study

**Supplemental Table IV Cardiovascular Diseases and Cardiovascular Risk Factors and Corresponding ICD-9 Codes**

| Cause Name                  | ICD9 Codes | ICD9 Names                                                                 |
|-----------------------------|------------|----------------------------------------------------------------------------|
| Atrial Fibrillation/Flutter | 4273       | Atrial fibrillation and flutter                                            |
|                             | 42731      | Atrial fibrillation                                                        |
|                             | 42732      | Atrial flutter                                                             |
| Aortic Aneurysms            | 441        | Aortic aneurysm and dissection                                             |
|                             | 4410       | Dissection of aorta                                                        |
|                             | 44100      | Aortic aneurysm and dissection unspecified site                            |
|                             | 44101      | Aortic aneurysm and dissection thoracic                                    |
|                             | 44102      | Aortic aneurysm and dissection abdominal                                   |
|                             | 44103      | Aortic aneurysm and dissection thoracoabdominal                            |
|                             | 4411       | Thoracic aneurysm, ruptured                                                |
|                             | 4412       | Thoracic aneurysm without mention of rupture                               |
|                             | 4413       | Abdominal aneurysm, ruptured                                               |
|                             | 4414       | Abdominal aneurysm without mention of rupture                              |
|                             | 4415       | Aortic aneurysm of unspecified site, ruptured                              |
|                             | 4416       | Thoracoabdominal aneurysm, ruptured                                        |
|                             | 4417       | Thoracoabdominal aneurysm, without mention of rupture                      |
|                             | 4419       | Aortic aneurysm of unspecified site without mention of rupture             |
| Endocarditis                | 7422       | Coxsackie endocarditis                                                     |
|                             | 421        | Acute and subacute endocarditis                                            |
|                             | 4210       | Acute and subacute bacterial endocarditis                                  |
|                             | 4211       | Acute and subacute infective endocarditis in diseases classified elsewhere |
|                             | 4219       | Acute endocarditis, unspecified                                            |
|                             | 424        | Other diseases of endocardium                                              |
|                             | 4244       | Other endocarditis, valve unspecified                                      |
|                             | 4245       | Other endocarditis, valve unspecified                                      |
|                             | 4248       | Pulmonary valve disorders                                                  |
|                             | 4249       | Endocarditis valve unspecified                                             |
|                             | 42490      | Endocarditis, valve unspecified, unspecified cause                         |
|                             | 42491      | Endocarditis in diseases classified elsewhere                              |
|                             | 42499      | Other endocarditis, valve unspecified                                      |
| Heart Failure               | 742        | Coxsackie carditis                                                         |
|                             | 7423       | Coxsackie myocarditis                                                      |
|                             | 422        | Acute myocarditis                                                          |
|                             | 4220       | Acute myocarditis in diseases classified elsewhere                         |
|                             | 4224       | Other acute myocarditis                                                    |
|                             | 4225       | Acute myocarditis in diseases classified elsewhere                         |

|  |       |                                                       |
|--|-------|-------------------------------------------------------|
|  | 4229  | Other and unspecified acute myocarditis               |
|  | 42290 | Acute myocarditis, unspecified                        |
|  | 42291 | Idiopathic myocarditis                                |
|  | 42292 | Septic myocarditis                                    |
|  | 42293 | Toxic myocarditis                                     |
|  | 42299 | Other acute myocarditis                               |
|  | 425   | Cardiomyopathy                                        |
|  | 4250  | Endomyocardial fibrosis                               |
|  | 4251  | Hypertrophic cardiomyopathy                           |
|  | 42511 | Hypertrophic obstructive cardiomyopathy               |
|  | 42518 | Other hypertrophic cardiomyopathy                     |
|  | 4252  | Obscure cardiomyopathy of Africa                      |
|  | 4253  | Endocardial fibroelastosis                            |
|  | 4254  | Other primary cardiomyopathies                        |
|  | 4255  | Alcoholic cardiomyopathy                              |
|  | 4257  | Nutritional and metabolic cardiomyopathy              |
|  | 4258  | Cardiomyopathy in other diseases classified elsewhere |
|  | 4259  | Secondary cardiomyopathy, unspecified                 |
|  | 4290  | Myocarditis, unspecified                              |
|  | 4291  | Myocardial degeneration                               |
|  | 416   | Chronic pulmonary heart disease                       |
|  | 4160  | Primary pulmonary hypertension                        |
|  | 4162  | Chronic pulmonary embolism                            |
|  | 4163  | Chronic pulmonary heart disease unspecified           |
|  | 4168  | Other chronic pulmonary heart diseases                |
|  | 4169  | Chronic pulmonary heart disease unspecified           |
|  | 428   | Heart failure                                         |
|  | 4280  | Congestive heart failure, unspecified                 |
|  | 4281  | Left heart failure                                    |
|  | 4282  | Systolic heart failure                                |
|  | 42820 | Heart failure unspecified                             |
|  | 42821 | Acute systolic heart failure                          |
|  | 42822 | Chronic systolic heart failure                        |
|  | 42823 | Acute on chronic systolic heart failure               |
|  | 4283  | Diastolic heart failure                               |
|  | 42830 | Heart failure unspecified                             |
|  | 42831 | Acute diastolic heart failure                         |
|  | 42832 | Chronic diastolic heart failure                       |
|  | 42833 | Acute on chronic diastolic heart failure              |
|  | 4284  | Combined systolic and diastolic heart failure         |
|  | 42840 | Heart failure unspecified                             |
|  | 42841 | Acute combined systolic and diastolic heart failure   |
|  | 42842 | Chronic combined systolic and diastolic heart failure |



|                        |       |                                                                |
|------------------------|-------|----------------------------------------------------------------|
|                        | 42843 | Acute on chronic combined systolic and diastolic heart failure |
|                        | 4286  | Heart failure unspecified                                      |
|                        | 4287  | Heart failure unspecified                                      |
|                        | 4288  | Heart failure unspecified                                      |
|                        | 4289  | Heart failure unspecified                                      |
|                        | 402   | Hypertensive heart disease                                     |
|                        | 4020  | Malignant hypertensive heart disease                           |
|                        | 40200 | Hypertensive heart disease without heart failure               |
|                        | 40201 | Hypertensive heart disease with heart failure                  |
|                        | 4021  | Benign hypertensive heart disease                              |
|                        | 40210 | Hypertensive heart disease without heart failure               |
|                        | 40211 | Hypertensive heart disease with heart failure                  |
|                        | 4023  | With congestive heart failure                                  |
|                        | 4027  | Hypertensive heart disease with heart failure                  |
|                        | 4029  | Unspecified hypertensive heart disease                         |
|                        | 40290 | Hypertensive heart disease without heart failure               |
|                        | 40291 | Hypertensive heart disease with heart failure                  |
| Ischemic Heart Disease | 410   | Acute myocardial infarction                                    |
|                        | 4100  | Acute myocardial infarction of anterolateral wall              |
|                        | 41000 | Acute myocardial infarction episode of care unspecified        |
|                        | 41001 | Acute myocardial infarction initial episode of care            |
|                        | 41002 | Acute myocardial infarction subsequent episode of care         |
|                        | 4101  | Acute myocardial infarction of other anterior wall             |
|                        | 41010 | Acute myocardial infarction episode of care unspecified        |
|                        | 41011 | Acute myocardial infarction initial episode of care            |
|                        | 41012 | Acute myocardial infarction subsequent episode of care         |
|                        | 4102  | Acute myocardial infarction of inferolateral wall              |
|                        | 41020 | Acute myocardial infarction episode of care unspecified        |
|                        | 41021 | Acute myocardial infarction initial episode of care            |
|                        | 41022 | Acute myocardial infarction subsequent episode of care         |
|                        | 4103  | Acute myocardial infarction of inferoposterior wall            |
|                        | 41030 | Acute myocardial infarction episode of care unspecified        |
|                        | 41031 | Acute myocardial infarction initial episode of care            |
|                        | 41032 | Acute myocardial infarction subsequent episode of care         |

|  |       |                                                          |
|--|-------|----------------------------------------------------------|
|  | 4104  | Acute myocardial infarction of other inferior wall       |
|  | 41040 | Acute myocardial infarction episode of care unspecified  |
|  | 41041 | Acute myocardial infarction initial episode of care      |
|  | 41042 | Acute myocardial infarction subsequent episode of care   |
|  | 4105  | Acute myocardial infarction of other lateral wall        |
|  | 41050 | Acute myocardial infarction episode of care unspecified  |
|  | 41051 | Acute myocardial infarction initial episode of care      |
|  | 41052 | Acute myocardial infarction subsequent episode of care   |
|  | 4106  | True posterior wall infarction                           |
|  | 41060 | Acute myocardial infarction episode of care unspecified  |
|  | 41061 | Acute myocardial infarction initial episode of care      |
|  | 41062 | Acute myocardial infarction subsequent episode of care   |
|  | 4107  | Subendocardial infarction                                |
|  | 41070 | Acute myocardial infarction episode of care unspecified  |
|  | 41071 | Acute myocardial infarction initial episode of care      |
|  | 41072 | Acute myocardial infarction subsequent episode of care   |
|  | 4108  | Acute myocardial infarction of other specified sites     |
|  | 41080 | Acute myocardial infarction episode of care unspecified  |
|  | 41081 | Acute myocardial infarction initial episode of care      |
|  | 41082 | Acute myocardial infarction subsequent episode of care   |
|  | 4109  | Acute myocardial infarction of unspecified site          |
|  | 41090 | Acute myocardial infarction episode of care unspecified  |
|  | 41091 | Acute myocardial infarction initial episode of care      |
|  | 41092 | Acute myocardial infarction subsequent episode of care   |
|  | 411   | Other acute and subacute forms of ischemic heart disease |
|  | 4110  | Postmyocardial infarction syndrome                       |
|  | 4111  | Intermediate coronary syndrome                           |
|  | 4118  | Other acute and subacute forms of ischemic heart disease |

|  |       |                                                                                                     |
|--|-------|-----------------------------------------------------------------------------------------------------|
|  | 41181 | Acute coronary occlusion without myocardial infarction                                              |
|  | 41189 | Other acute and subacute forms of ischemic heart disease other                                      |
|  | 4119  | Other acute and subacute forms of ischaemic heart disease                                           |
|  | 412   | Old myocardial infarction                                                                           |
|  | 4120  | Old myocardial infarction                                                                           |
|  | 4129  | Old myocardial infarction                                                                           |
|  | 413   | Angina pectoris                                                                                     |
|  | 4130  | Angina decubitus                                                                                    |
|  | 4131  | Prinzmetal angina                                                                                   |
|  | 4139  | Other and unspecified angina pectoris                                                               |
|  | 414   | Other forms of chronic ischemic heart disease                                                       |
|  | 4140  | Coronary atherosclerosis                                                                            |
|  | 41400 | Other forms of chronic ischemic heart disease of unspecified type of vessel, native or graft        |
|  | 41401 | Other forms of chronic ischemic heart disease of native coronary artery                             |
|  | 41402 | Other forms of chronic ischemic heart disease of autologous vein bypass graft                       |
|  | 41403 | Other forms of chronic ischemic heart disease of nonautologous biological bypass graft              |
|  | 41404 | Other forms of chronic ischemic heart disease of artery bypass graft                                |
|  | 41405 | Other forms of chronic ischemic heart disease of unspecified bypass graft                           |
|  | 41406 | Other forms of chronic ischemic heart disease of native coronary artery of transplanted heart       |
|  | 41407 | Other forms of chronic ischemic heart disease of bypass graft (artery) (vein) of transplanted heart |
|  | 4141  | Aneurysm and dissection of heart                                                                    |
|  | 41410 | Aneurysm of heart (wall)                                                                            |
|  | 41411 | Aneurysm of coronary vessels                                                                        |
|  | 41412 | Dissection of coronary artery                                                                       |
|  | 41419 | Other aneurysm of heart                                                                             |
|  | 4142  | Chronic total occlusion of coronary artery                                                          |
|  | 4143  | Coronary atherosclerosis due to lipid rich plaque                                                   |
|  | 4144  | Coronary atherosclerosis due to calcified coronary lesion                                           |
|  | 4145  | Chronic ischemic heart disease, unspecified                                                         |
|  | 4148  | Other specified forms of chronic ischemic heart disease                                             |

|                              |       |                                                      |
|------------------------------|-------|------------------------------------------------------|
|                              | 4149  | Chronic ischemic heart disease, unspecified          |
|                              | V173  | Family history of ischemic heart disease             |
|                              | V810  | Screening for ischemic heart disease                 |
| Other Cardiovascular Disease | 417   | Other diseases of pulmonary circulation              |
|                              | 4170  | Arteriovenous fistula of pulmonary vessels           |
|                              | 4171  | Aneurysm of pulmonary artery                         |
|                              | 4178  | Other specified diseases of pulmonary circulation    |
|                              | 4179  | Unspecified disease of pulmonary circulation         |
|                              | 420   | Acute pericarditis                                   |
|                              | 4200  | Acute pericarditis in diseases classified elsewhere  |
|                              | 4201  | Acute pericarditis                                   |
|                              | 4209  | Other and unspecified acute pericarditis             |
|                              | 42090 | Acute pericarditis, unspecified                      |
|                              | 42091 | Acute idiopathic pericarditis                        |
|                              | 42099 | Other acute pericarditis                             |
|                              | 423   | Other diseases of pericardium                        |
|                              | 4231  | Adhesive pericarditis                                |
|                              | 4232  | Constrictive pericarditis                            |
|                              | 4233  | Cardiac tamponade                                    |
|                              | 4237  | Other diseases of pericardium                        |
|                              | 4238  | Other specified diseases of pericardium              |
|                              | 4239  | Unspecified disease of pericardium                   |
|                              | 4240  | Mitral valve disorders                               |
|                              | 4241  | Aortic valve disorders                               |
|                              | 4242  | Tricuspid valve disorders, specified as nonrheumatic |
|                              | 4243  | Pulmonary valve disorders                            |
|                              | 442   | Other aneurysm                                       |
|                              | 4420  | Aneurysm of artery of upper extremity                |
|                              | 4421  | Aneurysm of renal artery                             |
|                              | 4422  | Aneurysm of iliac artery                             |
|                              | 4423  | Aneurysm of artery of lower extremity                |
|                              | 4424  |                                                      |
|                              | 4428  | Aneurysm of other specified artery                   |
|                              | 44281 | Aneurysm of artery of neck                           |
|                              | 44282 | Aneurysm of subclavian artery                        |
|                              | 44283 | Aneurysm of splenic artery                           |
|                              | 44284 | Aneurysm of other visceral artery                    |
|                              | 44289 | Aneurysm of other specified artery                   |
|                              | 4429  | Aneurysm of unspecified site                         |
|                              | 447   | Other disorders of arteries and arterioles           |
|                              | 4470  | Arteriovenous fistula, acquired                      |
|                              | 4471  | Stricture of artery                                  |

|  |       |                                                                            |
|--|-------|----------------------------------------------------------------------------|
|  | 4472  | Rupture of artery                                                          |
|  | 4473  | Hyperplasia of renal artery                                                |
|  | 4474  | Celiac artery compression syndrome                                         |
|  | 4475  | Necrosis of artery                                                         |
|  | 4476  | Arteritis, unspecified                                                     |
|  | 4477  | Aortic ectasia                                                             |
|  | 44770 | Other disorders of arteries and arterioles unspecified site                |
|  | 44771 | Thoracic aortic ectasia                                                    |
|  | 44772 | Abdominal aortic ectasia                                                   |
|  | 44773 | Thoracoabdominal aortic ectasia                                            |
|  | 4478  | Other specified disorders of arteries and arterioles                       |
|  | 4479  | Unspecified disorders of arteries and arterioles                           |
|  | 448   | Disease of capillaries                                                     |
|  | 4480  | Hereditary hemorrhagic telangiectasia                                      |
|  | 4481  | Nevus, non-neoplastic                                                      |
|  | 4489  | Other and unspecified capillary diseases                                   |
|  | 449   | Septic arterial embolism                                                   |
|  | 450   | Other and unspecified capillary diseases                                   |
|  | 451   | Phlebitis and thrombophlebitis                                             |
|  | 4510  | Phlebitis and thrombophlebitis of superficial vessels of lower extremities |
|  | 4511  | Phlebitis and thrombophlebitis of deep veins of lower extremities          |
|  | 45111 | Phlebitis and thrombophlebitis of femoral vein (deep) (superficial)        |
|  | 45119 | Phlebitis and thrombophlebitis other                                       |
|  | 4512  | Phlebitis and thrombophlebitis of lower extremities, unspecified           |
|  | 4513  | Phlebitis and thrombophlebitis of unspecified site                         |
|  | 4515  | Phlebitis and thrombophlebitis of unspecified site                         |
|  | 4517  | Phlebitis and thrombophlebitis of unspecified site                         |
|  | 4518  | Phlebitis and thrombophlebitis of other sites                              |
|  | 45181 | Phlebitis and thrombophlebitis of iliac vein                               |
|  | 45182 | Phlebitis and thrombophlebitis of superficial veins of upper extremities   |
|  | 45183 | Phlebitis and thrombophlebitis of deep veins of upper extremities          |
|  | 45184 | Phlebitis and thrombophlebitis of upper extremities, unspecified           |
|  | 45189 | Phlebitis and thrombophlebitis of other sites                              |
|  | 4519  | Phlebitis and thrombophlebitis of unspecified site                         |
|  | 452   | Portal vein thrombosis                                                     |

|  |       |                                                                                       |
|--|-------|---------------------------------------------------------------------------------------|
|  | 4520  | Portal vein thrombosis                                                                |
|  | 4523  | Portal vein thrombosis                                                                |
|  | 4524  | Portal vein thrombosis                                                                |
|  | 4529  | Portal vein thrombosis                                                                |
|  | 453   | Other venous embolism and thrombosis                                                  |
|  | 4530  | Budd-chiari syndrome                                                                  |
|  | 4531  | Thrombophlebitis migrans                                                              |
|  | 4532  | Other venous embolism and thrombosis of inferior vena cava                            |
|  | 4533  | Other venous embolism and thrombosis of renal vein                                    |
|  | 4534  | Acute venous embolism and thrombosis of deep vessels of lower extremity               |
|  | 45340 | Acute venous embolism and thrombosis of unspecified deep vessels of lower extremity   |
|  | 45341 | Acute venous embolism and thrombosis of deep vessels of proximal lower extremity      |
|  | 45342 | Acute venous embolism and thrombosis of deep vessels of distal lower extremity        |
|  | 4535  | Chronic venous embolism and thrombosis of deep vessels of lower extremity             |
|  | 45350 | Chronic venous embolism and thrombosis of unspecified deep vessels of lower extremity |
|  | 45351 | Chronic venous embolism and thrombosis of deep vessels of proximal lower extremity    |
|  | 45352 | Chronic venous embolism and thrombosis of deep vessels of distal lower extremity      |
|  | 4536  | Venous embolism and thrombosis of superficial vessels of lower extremity              |
|  | 4537  | Chronic venous embolism and thrombosis of other specified vessels                     |
|  | 45371 | Chronic venous embolism and thrombosis of superficial veins of upper extremity        |
|  | 45372 | Chronic venous embolism and thrombosis of deep veins of upper extremity               |
|  | 45373 | Chronic venous embolism and thrombosis of upper extremity, unspecified                |
|  | 45374 | Chronic venous embolism and thrombosis of axillary veins                              |
|  | 45375 | Chronic venous embolism and thrombosis of subclavian veins                            |
|  | 45376 | Chronic venous embolism and thrombosis of internal jugular veins                      |

|  |       |                                                                              |
|--|-------|------------------------------------------------------------------------------|
|  | 45377 | Chronic venous embolism and thrombosis of other thoracic veins               |
|  | 45379 | Chronic venous embolism and thrombosis of other specified veins              |
|  | 4538  | Acute venous embolism and thrombosis of other specified veins                |
|  | 45381 | Acute venous embolism and thrombosis of superficial veins of upper extremity |
|  | 45382 | Acute venous embolism and thrombosis of deep veins of upper extremity        |
|  | 45383 | Acute venous embolism and thrombosis of upper extremity, unspecified         |
|  | 45384 | Acute venous embolism and thrombosis of axillary veins                       |
|  | 45385 | Acute venous embolism and thrombosis of subclavian veins                     |
|  | 45386 | Acute venous embolism and thrombosis of internal jugular veins               |
|  | 45387 | Acute venous embolism and thrombosis of other thoracic veins                 |
|  | 45389 | Acute venous embolism and thrombosis of other specified veins                |
|  | 4539  | Other venous embolism and thrombosis of unspecified site                     |
|  | 454   | Varicose veins of lower extremities                                          |
|  | 4540  | Varicose veins of lower extremities with ulcer                               |
|  | 4541  | Varicose veins of lower extremities with inflammation                        |
|  | 4542  | Varicose veins of lower extremities with ulcer and inflammation              |
|  | 4548  | Varicose veins of lower extremities with other complications                 |
|  | 4549  | Asymptomatic varicose veins                                                  |
|  | 456   | Varicose veins of other sites                                                |
|  | 4563  | Sublingual varices                                                           |
|  | 4564  | Scrotal varices                                                              |
|  | 4565  | Pelvic varices                                                               |
|  | 4566  | Vulval varices                                                               |
|  | 4568  | Varices of other sites                                                       |
|  | 4569  | Varices of other sites                                                       |
|  | 457   | Noninfectious disorders of lymphatic channels                                |
|  | 4571  | Other lymphedema                                                             |
|  | 4578  | Other noninfectious disorders of lymphatic channels                          |

|                             |       |                                                             |
|-----------------------------|-------|-------------------------------------------------------------|
|                             | 4579  | Unspecified noninfectious disorder of lymphatic channels    |
|                             | 459   | Other disorders of circulatory system                       |
|                             | 4591  | Postphlebotic syndrome                                      |
|                             | 45910 | Postphlebotic syndrome without complications                |
|                             | 45911 | Postphlebotic syndrome with ulcer                           |
|                             | 45912 | Postphlebotic syndrome with inflammation                    |
|                             | 45913 | Postphlebotic syndrome with ulcer and inflammation          |
|                             | 45919 | Postphlebotic syndrome with other complication              |
|                             | 4592  | Compression of vein                                         |
|                             | 4593  | Chronic venous hypertension (idiopathic)                    |
|                             | 45930 | Chronic venous hypertension without complications           |
|                             | 45931 | Chronic venous hypertension with ulcer                      |
|                             | 45932 | Chronic venous hypertension with inflammation               |
|                             | 45933 | Chronic venous hypertension with ulcer and inflammation     |
|                             | 45939 | Chronic venous hypertension with other complication         |
| Peripheral Arterial Disease | 4402  | Atherosclerosis of native arteries of the extremities       |
|                             | 44020 | Atherosclerosis unspecified                                 |
|                             | 44021 | Atherosclerosis with intermittent claudication              |
|                             | 44022 | Atherosclerosis with rest pain                              |
|                             | 44023 | Atherosclerosis with ulceration                             |
|                             | 44024 | Atherosclerosis with gangrene                               |
|                             | 44029 | Other atherosclerosis of native arteries of the extremities |
|                             | 4404  | Chronic total occlusion of artery of the extremities        |
|                             | 4408  | Atherosclerosis of other specified arteries                 |
|                             | 4409  | Generalized and unspecified atherosclerosis                 |
|                             | 443   | Other peripheral vascular disease                           |
|                             | 4430  | Raynaud's syndrome                                          |
|                             | 4431  | Thromboangiitis obliterans [Buerger's disease]              |
|                             | 4432  | Other arterial dissection                                   |
|                             | 44321 | <b>Dissection of carotid artery</b>                         |
|                             | 44322 | <b>Dissection of iliac artery</b>                           |
|                             | 44323 | <b>Dissection of renal artery</b>                           |
|                             | 44324 | <b>Dissection of vertebral artery</b>                       |
|                             | 44329 | <b>Dissection of other artery</b>                           |
|                             | 4438  | Other specified peripheral vascular diseases                |
|                             | 44381 | Peripheral angiopathy in diseases classified elsewhere      |
|                             | 44382 | Erythromelalgia                                             |
|                             | 44389 | Other specified peripheral vascular diseases                |
|                             | 4439  | Peripheral vascular disease, unspecified                    |
| Rheumatic Heart Disease     | 391   | Rheumatic fever with heart involvement                      |



|                         |       |                                                           |
|-------------------------|-------|-----------------------------------------------------------|
|                         | 3910  | Acute rheumatic pericarditis                              |
|                         | 3911  | Acute rheumatic endocarditis                              |
|                         | 3912  | Acute rheumatic myocarditis                               |
|                         | 3914  |                                                           |
|                         | 3918  | Other acute rheumatic heart disease                       |
|                         | 3919  | Acute rheumatic heart disease, unspecified                |
|                         | 3920  | Rheumatic chorea with heart involvement                   |
|                         | 393   | Chronic rheumatic pericarditis                            |
|                         | 3930  |                                                           |
|                         | 3939  |                                                           |
|                         | 394   | Diseases of mitral valve                                  |
|                         | 3940  | Mitral stenosis                                           |
|                         | 3941  | Rheumatic mitral insufficiency                            |
|                         | 3942  | Mitral stenosis with insufficiency                        |
|                         | 3945  |                                                           |
|                         | 3949  | Other and unspecified mitral valve diseases               |
|                         | 395   | Diseases of aortic valve                                  |
|                         | 3950  | Rheumatic aortic stenosis                                 |
|                         | 3951  | Rheumatic aortic insufficiency                            |
|                         | 3952  | Rheumatic aortic stenosis with insufficiency              |
|                         | 3959  | Other and unspecified rheumatic aortic diseases           |
|                         | 396   | Diseases of mitral and aortic valves                      |
|                         | 3960  | Mitral valve stenosis and aortic valve stenosis           |
|                         | 3961  | Mitral valve stenosis and aortic valve insufficiency      |
|                         | 3962  | Mitral valve insufficiency and aortic valve stenosis      |
|                         | 3963  | Mitral valve insufficiency and aortic valve insufficiency |
|                         | 3968  | Multiple involvement of mitral and aortic valves          |
|                         | 3969  | Mitral and aortic valve diseases, unspecified             |
|                         | 397   | Diseases of other endocardial structures                  |
|                         | 3970  | Diseases of tricuspid valve                               |
|                         | 3971  | Rheumatic diseases of pulmonary valve                     |
|                         | 3979  | Rheumatic diseases of endocardium, valve unspecified      |
|                         | 398   | Other rheumatic heart disease                             |
|                         | 3980  | Rheumatic myocarditis                                     |
|                         | 3988  |                                                           |
|                         | 3989  | Other and unspecified rheumatic heart diseases            |
|                         | 39890 | Rheumatic heart disease, unspecified                      |
|                         | 39891 | Rheumatic heart failure (congestive)                      |
|                         | 39899 | Other rheumatic heart diseases                            |
| Cerebrovascular Disease | 430   | Subarachnoid hemorrhage                                   |
|                         | 4300  | Subarachnoid hemorrhage                                   |
|                         | 4301  | Subarachnoid hemorrhage                                   |
|                         | 4304  | Subarachnoid hemorrhage                                   |

|  |       |                                                                                       |
|--|-------|---------------------------------------------------------------------------------------|
|  | 4306  | Subarachnoid hemorrhage                                                               |
|  | 4309  | Subarachnoid hemorrhage                                                               |
|  | 431   | Intracerebral hemorrhage                                                              |
|  | 4310  | Intracerebral hemorrhage                                                              |
|  | 4311  | Intracerebral hemorrhage                                                              |
|  | 4312  | Intracerebral hemorrhage                                                              |
|  | 4319  | Intracerebral hemorrhage                                                              |
|  | 432   | Other and unspecified intracranial hemorrhage                                         |
|  | 4320  | Nontraumatic extradural hemorrhage                                                    |
|  | 4321  | Subdural hemorrhage                                                                   |
|  | 4324  | Unspecified intracranial hemorrhage                                                   |
|  | 4325  | Unspecified intracranial hemorrhage                                                   |
|  | 4327  | Unspecified intracranial hemorrhage                                                   |
|  | 4329  | Unspecified intracranial hemorrhage                                                   |
|  | 433   | Occlusion and stenosis of precerebral arteries                                        |
|  | 4330  | Occlusion and stenosis of basilar artery                                              |
|  | 43300 | Occlusion and stenosis of precerebral arteries without mention of cerebral infarction |
|  | 43301 | Occlusion and stenosis of precerebral arteries with cerebral infarction               |
|  | 4331  | Occlusion and stenosis of carotid artery                                              |
|  | 43310 | Occlusion and stenosis of precerebral arteries without mention of cerebral infarction |
|  | 43311 | Occlusion and stenosis of precerebral arteries with cerebral infarction               |
|  | 4332  | Occlusion and stenosis of vertebral artery                                            |
|  | 43320 | Occlusion and stenosis of precerebral arteries without mention of cerebral infarction |
|  | 43321 | Occlusion and stenosis of precerebral arteries with cerebral infarction               |
|  | 4333  | Occlusion and stenosis of multiple and bilateral precerebral arteries                 |
|  | 43330 | Occlusion and stenosis of precerebral arteries without mention of cerebral infarction |
|  | 43331 | Occlusion and stenosis of precerebral arteries with cerebral infarction               |
|  | 4338  | Occlusion and stenosis of other specified precerebral artery                          |
|  | 43380 | Occlusion and stenosis of precerebral arteries without mention of cerebral infarction |
|  | 43381 | Occlusion and stenosis of precerebral arteries with cerebral infarction               |

|  |       |                                                                                       |
|--|-------|---------------------------------------------------------------------------------------|
|  | 4339  | Occlusion and stenosis of unspecified precerebral artery                              |
|  | 43390 | Occlusion and stenosis of precerebral arteries without mention of cerebral infarction |
|  | 43391 | Occlusion and stenosis of precerebral arteries with cerebral infarction               |
|  | 434   | Occlusion of cerebral arteries                                                        |
|  | 4340  | Cerebral thrombosis                                                                   |
|  | 43400 | Occlusion of cerebral arteries without mention of cerebral infarction                 |
|  | 43401 | Occlusion of cerebral arteries with cerebral infarction                               |
|  | 4341  | Cerebral embolism                                                                     |
|  | 43410 | Occlusion of cerebral arteries without mention of cerebral infarction                 |
|  | 43411 | Occlusion of cerebral arteries with cerebral infarction                               |
|  | 4343  | Cerebral artery occlusion, unspecified with cerebral infarction                       |
|  | 4344  | Cerebral artery occlusion, unspecified with cerebral infarction                       |
|  | 4346  | Cerebral artery occlusion, unspecified with cerebral infarction                       |
|  | 4347  | Cerebral artery occlusion, unspecified with cerebral infarction                       |
|  | 4349  | Cerebral artery occlusion unspecified                                                 |
|  | 43490 | Cerebral artery occlusion, unspecified without mention of cerebral infarction         |
|  | 43491 | Cerebral artery occlusion, unspecified with cerebral infarction                       |
|  | 435   | Transient cerebral ischemia                                                           |
|  | 4350  | Basilar artery syndrome                                                               |
|  | 4351  | Vertebral artery syndrome                                                             |
|  | 4352  | Subclavian steal syndrome                                                             |
|  | 4353  | Vertebrobasilar artery syndrome                                                       |
|  | 4358  | Other specified transient cerebral ischemias                                          |
|  | 4359  | Unspecified transient cerebral ischemia                                               |
|  | 436   | Acute, but ill-defined, cerebrovascular disease                                       |
|  | 4360  | Acute, but ill-defined, cerebrovascular disease                                       |
|  | 4361  | Acute, but ill-defined, cerebrovascular disease                                       |
|  | 4363  | Acute, but ill-defined, cerebrovascular disease                                       |
|  | 4368  | Acute, but ill-defined, cerebrovascular disease                                       |
|  | 4369  | Acute, but ill-defined, cerebrovascular disease                                       |
|  | 437   | Other and ill-defined cerebrovascular disease                                         |
|  | 4370  | Cerebral atherosclerosis                                                              |

|  |       |                                                                                              |
|--|-------|----------------------------------------------------------------------------------------------|
|  | 4371  | Other generalized ischemic cerebrovascular disease                                           |
|  | 4372  | Hypertensive encephalopathy                                                                  |
|  | 4373  | Cerebral aneurysm, nonruptured                                                               |
|  | 4374  | Cerebral arteritis                                                                           |
|  | 4375  | Moyamoya disease                                                                             |
|  | 4376  | Nonpyogenic thrombosis of intracranial venous sinus                                          |
|  | 4377  | Transient global amnesia                                                                     |
|  | 4378  | Other ill-defined cerebrovascular disease                                                    |
|  | 4379  | Unspecified cerebrovascular disease                                                          |
|  | 438   | Late effects of cerebrovascular disease                                                      |
|  | 4380  | Late effects of cerebrovascular disease cognitive deficits                                   |
|  | 4381  | Speech and language deficits                                                                 |
|  | 43810 | Late effects of cerebrovascular disease, speech and language deficit, unspecified            |
|  | 43811 | Late effects of cerebrovascular disease, aphasia                                             |
|  | 43812 | Late effects of cerebrovascular disease, dysphasia                                           |
|  | 43813 | Late effects of cerebrovascular disease, dysarthria                                          |
|  | 43814 | Late effects of cerebrovascular disease, fluency disorder                                    |
|  | 43819 | Late effects of cerebrovascular disease, other speech and language deficits                  |
|  | 4382  | Hemiplegia/hemiparesis                                                                       |
|  | 43820 | Late effects of cerebrovascular disease, hemiplegia affecting unspecified side               |
|  | 43821 | Late effects of cerebrovascular disease, hemiplegia affecting dominant side                  |
|  | 43822 | Late effects of cerebrovascular disease, hemiplegia affecting nondominant side               |
|  | 4383  | Monoplegia of upper limb                                                                     |
|  | 43830 | Late effects of cerebrovascular disease, monoplegia of upper limb affecting unspecified side |
|  | 43831 | Late effects of cerebrovascular disease, monoplegia of upper limb affecting dominant side    |
|  | 43832 | Late effects of cerebrovascular disease, monoplegia of upper limb affecting nondominant side |
|  | 4384  | Monoplegia of lower limb                                                                     |
|  | 43840 | Late effects of cerebrovascular disease, monoplegia of lower limb affecting unspecified side |
|  | 43841 | Late effects of cerebrovascular disease, monoplegia of lower limb affecting dominant side    |
|  | 43842 | Late effects of cerebrovascular disease, monoplegia of lower limb affecting nondominant side |

|                             |       |                                                                                                        |
|-----------------------------|-------|--------------------------------------------------------------------------------------------------------|
|                             | 4385  | Other paralytic syndrome                                                                               |
|                             | 43850 | Late effects of cerebrovascular disease, other paralytic syndrome affecting unspecified side           |
|                             | 43851 | Late effects of cerebrovascular disease, other paralytic syndrome affecting dominant side              |
|                             | 43852 | Late effects of cerebrovascular disease, other paralytic syndrome affecting nondominant side           |
|                             | 43853 | Late effects of cerebrovascular disease, other paralytic syndrome, bilateral                           |
|                             | 4386  | Late effects of cerebrovascular disease alterations of sensations                                      |
|                             | 4387  | Late effects of cerebrovascular disease disturbances of vision                                         |
|                             | 4388  | Other late effects of cerebrovascular disease                                                          |
|                             | 43881 | Late effects of cerebrovascular disease apraxia                                                        |
|                             | 43882 | Late effects of cerebrovascular disease dysphagia                                                      |
|                             | 43883 | Late effects of cerebrovascular disease facial weakness                                                |
|                             | 43884 | Late effects of cerebrovascular disease ataxia                                                         |
|                             | 43885 | Late effects of cerebrovascular disease vertigo                                                        |
|                             | 43889 | Other late effects of cerebrovascular disease                                                          |
|                             | 4389  | Unspecified late effects of cerebrovascular disease                                                    |
|                             | 439   | Unspecified late effects of cerebrovascular disease                                                    |
|                             | 4396  | Unspecified late effects of cerebrovascular disease                                                    |
|                             | V1254 | Personal history of transient ischemic attack (TIA), and cerebral infarction without residual deficits |
|                             | V171  | Family history of stroke (cerebrovascular)                                                             |
| Treatment of Hyperlipidemia | 272   | Disorders of lipid metabolism                                                                          |
|                             | 2720  | Pure hypercholesterolemia                                                                              |
|                             | 2721  | Pure hyperglyceridemia                                                                                 |
|                             | 2722  | Mixed hyperlipidemia                                                                                   |
|                             | 2723  | Hyperchylomicronemia                                                                                   |
|                             | 2724  | Other and unspecified hyperlipidemia                                                                   |
|                             | 2725  | Lipoprotein deficiencies                                                                               |
|                             | 2726  | Lipodystrophy                                                                                          |
|                             | 2727  | Lipidoses                                                                                              |
|                             | 2728  | Other disorders of lipid metabolism                                                                    |
|                             | 2729  | Unspecified disorder of lipid metabolism                                                               |
| Treatment of Hypertension   | 401   | Essential hypertension                                                                                 |
|                             | 4010  | Malignant essential hypertension                                                                       |
|                             | 4011  | Benign essential hypertension                                                                          |
|                             | 4019  | Unspecified essential hypertension                                                                     |
|                             | 405   | Secondary hypertension                                                                                 |

|  |       |                                                                   |
|--|-------|-------------------------------------------------------------------|
|  | 4050  | Malignant secondary hypertension                                  |
|  | 40501 | Malignant renovascular hypertension                               |
|  | 40509 | Other malignant secondary hypertension                            |
|  | 4051  | Benign secondary hypertension                                     |
|  | 40511 | Benign renovascular hypertension                                  |
|  | 40519 | Other benign secondary hypertension                               |
|  | 4059  | Unspecified secondary hypertension                                |
|  | 40591 | Unspecified renovascular hypertension                             |
|  | 40599 | Other unspecified secondary hypertension                          |
|  | 458   | Hypotension                                                       |
|  | 4588  | Other specified hypotension                                       |
|  | 4589  | Hypotension unspecified                                           |
|  | 7962  | Elevated blood pressure reading without diagnosis of hypertension |
|  | 7963  | Nonspecific low blood pressure reading                            |
|  | V811  | Screening for hypertension                                        |

**Supplemental Table V Cardiovascular Diseases and Cardiovascular Risk Factors and Corresponding ICD-10 Codes**

| Cause Name                  | ICD10 Codes      | ICD10 Names                                                             |                                              |
|-----------------------------|------------------|-------------------------------------------------------------------------|----------------------------------------------|
| Atrial Fibrillation/Flutter | I48              | Atrial fibrillation and flutter                                         |                                              |
|                             | I480             | Paroxysmal atrial fibrillation                                          |                                              |
|                             | I481             | Persistent atrial fibrillation                                          |                                              |
|                             | I482             | Chronic atrial fibrillation                                             |                                              |
|                             | I483             | Typical atrial flutter                                                  |                                              |
|                             | I484             | Atypical atrial flutter                                                 |                                              |
|                             | I489             | Unspecified atrial fibrillation and atrial flutter                      |                                              |
|                             | I4891            | Unspecified atrial fibrillation                                         |                                              |
|                             | I4892            | Unspecified atrial flutter                                              |                                              |
|                             | Aortic Aneurysms | I71                                                                     | Aortic aneurysm and dissection               |
| I710                        |                  | Dissection of aorta                                                     |                                              |
| I7100                       |                  | Dissection of unspecified site of aorta                                 |                                              |
| I7101                       |                  | Dissection of thoracic aorta                                            |                                              |
| I7102                       |                  | Dissection of abdominal aorta                                           |                                              |
| I7103                       |                  | Dissection of thoracoabdominal aorta                                    |                                              |
| I711                        |                  | Thoracic aortic aneurysm, ruptured                                      |                                              |
| I712                        |                  | Thoracic aortic aneurysm, without rupture                               |                                              |
| I713                        |                  | Abdominal aortic aneurysm, ruptured                                     |                                              |
| I714                        |                  | Abdominal aortic aneurysm, without rupture                              |                                              |
| I715                        |                  | Thoracoabdominal aortic aneurysm, ruptured                              |                                              |
| I716                        |                  | Thoracoabdominal aortic aneurysm, without rupture                       |                                              |
| I718                        |                  | Aortic aneurysm of unspecified site, ruptured                           |                                              |
| I719                        |                  | Aortic aneurysm of unspecified site, without rupture                    |                                              |
| I790                        |                  | Aneurysm of aorta in diseases classified elsewhere                      |                                              |
| Endocarditis                |                  | I33                                                                     | Acute and subacute endocarditis              |
|                             |                  | I330                                                                    | Acute and subacute infective endocarditis    |
|                             |                  | I339                                                                    | Acute and subacute endocarditis, unspecified |
|                             |                  | I38                                                                     | Endocarditis, valve unspecified              |
|                             | I380             |                                                                         |                                              |
|                             | I39              | Endocarditis and heart valve disorders in diseases classified elsewhere |                                              |
|                             | I390             | Mitral valve disorders in diseases classified elsewhere                 |                                              |
|                             | I391             | Aortic valve disorders in diseases classified elsewhere                 |                                              |
|                             | I392             | Tricuspid valve disorders in diseases classified elsewhere              |                                              |
|                             | I393             | Pulmonary valve disorders in diseases classified elsewhere              |                                              |
|                             | I394             | Multiple valve disorders in diseases classified elsewhere               |                                              |
|                             | I398             | Endocarditis, valve unspecified, in diseases classified elsewhere       |                                              |
|                             | I399             |                                                                         |                                              |
| Heart Failure*              | B332             | Viral carditis                                                          |                                              |
|                             | B3320            | Viral carditis, unspecified                                             |                                              |

|  |       |                                                 |
|--|-------|-------------------------------------------------|
|  | B3321 | Viral endocarditis                              |
|  | B3322 | Viral myocarditis                               |
|  | B3323 | Viral pericarditis                              |
|  | B3324 | Viral cardiomyopathy                            |
|  | I40   | Acute myocarditis                               |
|  | I400  | Infective myocarditis                           |
|  | I401  | Isolated myocarditis                            |
|  | I408  | Other acute myocarditis                         |
|  | I409  | Acute myocarditis, unspecified                  |
|  | I41   | Myocarditis in diseases classified elsewhere    |
|  | I410  | Myocarditis in diseases classified elsewhere    |
|  | I411  | Myocarditis in diseases classified elsewhere    |
|  | I412  | Myocarditis in diseases classified elsewhere    |
|  | I418  | Myocarditis in diseases classified elsewhere    |
|  | I42   | Cardiomyopathy                                  |
|  | I420  | Dilated cardiomyopathy                          |
|  | I421  | Obstructive hypertrophic cardiomyopathy         |
|  | I422  | Other hypertrophic cardiomyopathy               |
|  | I423  | Endomyocardial (eosinophilic) disease           |
|  | I424  | Endocardial fibroelastosis                      |
|  | I425  | Other restrictive cardiomyopathy                |
|  | I426  | Alcoholic cardiomyopathy                        |
|  | I427  | Cardiomyopathy due to drug and external agent   |
|  | I428  | Other cardiomyopathies                          |
|  | I429  | Cardiomyopathy, unspecified                     |
|  | I43   | Cardiomyopathy in diseases classified elsewhere |
|  | I430  | Cardiomyopathy in diseases classified elsewhere |
|  | I431  | Cardiomyopathy in diseases classified elsewhere |
|  | I432  | Cardiomyopathy in diseases classified elsewhere |
|  | I438  | Cardiomyopathy in diseases classified elsewhere |
|  | I514  | Myocarditis, unspecified                        |
|  | I515  | Myocardial degeneration                         |
|  | I516  | Cardiovascular disease, unspecified             |
|  | I270  | Primary pulmonary hypertension                  |
|  | I272  | Other secondary pulmonary hypertension          |
|  | I279  | Pulmonary heart disease, unspecified            |
|  | I50   | Heart failure                                   |
|  | I500  | Congestive heart failure                        |
|  | I501  | Left ventricular failure                        |
|  | I502  | Systolic (congestive) heart failure             |
|  | I5020 | Unspecified systolic (congestive) heart failure |
|  | I5021 | Acute systolic (congestive) heart failure       |
|  | I5022 | Chronic systolic (congestive) heart failure     |



|                        |       |                                                                                               |
|------------------------|-------|-----------------------------------------------------------------------------------------------|
|                        | I5023 | Acute on chronic systolic (congestive) heart failure                                          |
|                        | I503  | Diastolic (congestive) heart failure                                                          |
|                        | I5030 | Unspecified diastolic (congestive) heart failure                                              |
|                        | I5031 | Acute diastolic (congestive) heart failure                                                    |
|                        | I5032 | Chronic diastolic (congestive) heart failure                                                  |
|                        | I5033 | Acute on chronic diastolic (congestive) heart failure                                         |
|                        | I504  | Combined systolic (congestive) and diastolic (congestive) heart failure                       |
|                        | I5040 | Unspecified combined systolic (congestive) and diastolic (congestive) heart failure           |
|                        | I5041 | Acute combined systolic (congestive) and diastolic (congestive) heart failure                 |
|                        | I5042 | Chronic combined systolic (congestive) and diastolic (congestive) heart failure               |
|                        | I5043 | Acute on chronic combined systolic (congestive) and diastolic (congestive) heart failure      |
|                        | I508  |                                                                                               |
|                        | I509  | Heart failure, unspecified                                                                    |
|                        | J81   | Pulmonary edema                                                                               |
|                        | I11   | Hypertensive heart disease                                                                    |
|                        | I110  | Hypertensive heart disease with heart failure                                                 |
|                        | I112  |                                                                                               |
|                        | I119  | Hypertensive heart disease without heart failure                                              |
| Ischemic Heart Disease | I20   | Angina pectoris                                                                               |
|                        | I200  | Unstable angina                                                                               |
|                        | I201  | Angina pectoris with documented spasm                                                         |
|                        | I208  | Other forms of angina pectoris                                                                |
|                        | I209  | Angina pectoris, unspecified                                                                  |
|                        | I21   | ST elevation (STEMI) and non-ST elevation (NSTEMI) myocardial infarction                      |
|                        | I210  | ST elevation (STEMI) myocardial infarction of anterior wall                                   |
|                        | I2101 | ST elevation (STEMI) myocardial infarction involving left main coronary artery                |
|                        | I2102 | ST elevation (STEMI) myocardial infarction involving left anterior descending coronary artery |
|                        | I2109 | ST elevation (STEMI) myocardial infarction involving other coronary artery of anterior wall   |
|                        | I211  | ST elevation (STEMI) myocardial infarction of inferior wall                                   |
|                        | I2111 | ST elevation (STEMI) myocardial infarction involving right coronary artery                    |
|                        | I2119 | ST elevation (STEMI) myocardial infarction involving other coronary artery of inferior wall   |
|                        | I212  | ST elevation (STEMI) myocardial infarction of other sites                                     |

|  |        |                                                                                                                                             |
|--|--------|---------------------------------------------------------------------------------------------------------------------------------------------|
|  | I2121  | ST elevation (STEMI) myocardial infarction involving left circumflex coronary artery                                                        |
|  | I2129  | ST elevation (STEMI) myocardial infarction involving other sites                                                                            |
|  | I213   | ST elevation (STEMI) myocardial infarction of unspecified site                                                                              |
|  | I214   | Non-ST elevation (NSTEMI) myocardial infarction                                                                                             |
|  | I216   |                                                                                                                                             |
|  | I219   | Acute myocardial infarction, unspecified                                                                                                    |
|  | I21A   | NA                                                                                                                                          |
|  | I22    | Subsequent ST elevation (STEMI) and non-ST elevation (NSTEMI) myocardial infarction                                                         |
|  | I220   | Subsequent ST elevation (STEMI) myocardial infarction of anterior wall                                                                      |
|  | I221   | Subsequent ST elevation (STEMI) myocardial infarction of inferior wall                                                                      |
|  | I222   | Subsequent non-ST elevation (NSTEMI) myocardial infarction                                                                                  |
|  | I228   | Subsequent ST elevation (STEMI) myocardial infarction of other sites                                                                        |
|  | I229   | Subsequent ST elevation (STEMI) myocardial infarction of unspecified site                                                                   |
|  | I23    | Certain current complications following ST elevation (STEMI) and non-ST elevation (NSTEMI) myocardial infarction (within the 28 day period) |
|  | I24    | Other acute ischemic heart diseases                                                                                                         |
|  | I240   | Acute coronary thrombosis not resulting in myocardial infarction                                                                            |
|  | I241   | Dressler's syndrome                                                                                                                         |
|  | I248   | Other forms of acute ischemic heart disease                                                                                                 |
|  | I249   | Acute ischemic heart disease, unspecified                                                                                                   |
|  | I25    | Chronic ischemic heart disease                                                                                                              |
|  | I250   | Atherosclerotic cardiovascular disease, so described                                                                                        |
|  | I251   | Atherosclerotic heart disease of native coronary artery                                                                                     |
|  | I2510  | Atherosclerotic heart disease of native coronary artery without angina pectoris                                                             |
|  | I2511  | Atherosclerotic heart disease of native coronary artery with angina pectoris                                                                |
|  | I25110 | Atherosclerotic heart disease of native coronary artery with unstable angina pectoris                                                       |
|  | I25111 | Atherosclerotic heart disease of native coronary artery with angina pectoris with documented spasm                                          |
|  | I25118 | Atherosclerotic heart disease of native coronary artery with other forms of angina pectoris                                                 |
|  | I25119 | Atherosclerotic heart disease of native coronary artery with unspecified angina pectoris                                                    |
|  | I252   | Old myocardial infarction                                                                                                                   |

|  |        |                                                                                                                   |
|--|--------|-------------------------------------------------------------------------------------------------------------------|
|  | I253   | Aneurysm of heart                                                                                                 |
|  | I254   | Coronary artery aneurysm and dissection                                                                           |
|  | I2541  | Coronary artery aneurysm                                                                                          |
|  | I2542  | Coronary artery dissection                                                                                        |
|  | I255   | Ischemic cardiomyopathy                                                                                           |
|  | I256   | Silent myocardial ischemia                                                                                        |
|  | I257   | Atherosclerosis of coronary artery bypass graft(s) and coronary artery of transplanted heart with angina pectoris |
|  | I2570  | Atherosclerosis of coronary artery bypass graft(s), unspecified, with angina pectoris                             |
|  | I25700 | Atherosclerosis of coronary artery bypass graft(s), unspecified, with unstable angina pectoris                    |
|  | I25701 | Atherosclerosis of coronary artery bypass graft(s), unspecified, with angina pectoris with documented spasm       |
|  | I25708 | Atherosclerosis of coronary artery bypass graft(s), unspecified, with other forms of angina pectoris              |
|  | I25709 | Atherosclerosis of coronary artery bypass graft(s), unspecified, with unspecified angina pectoris                 |
|  | I2571  | Atherosclerosis of autologous vein coronary artery bypass graft(s) with angina pectoris                           |
|  | I25710 | Atherosclerosis of autologous vein coronary artery bypass graft(s) with unstable angina pectoris                  |
|  | I25711 | Atherosclerosis of autologous vein coronary artery bypass graft(s) with angina pectoris with documented spasm     |
|  | I25718 | Atherosclerosis of autologous vein coronary artery bypass graft(s) with other forms of angina pectoris            |
|  | I25719 | Atherosclerosis of autologous vein coronary artery bypass graft(s) with unspecified angina pectoris               |
|  | I2572  | Atherosclerosis of autologous artery coronary artery bypass graft(s) with angina pectoris                         |
|  | I25720 | Atherosclerosis of autologous artery coronary artery bypass graft(s) with unstable angina pectoris                |
|  | I25721 | Atherosclerosis of autologous artery coronary artery bypass graft(s) with angina pectoris with documented spasm   |
|  | I25728 | Atherosclerosis of autologous artery coronary artery bypass graft(s) with other forms of angina pectoris          |
|  | I25729 | Atherosclerosis of autologous artery coronary artery bypass graft(s) with unspecified angina pectoris             |
|  | I2573  | Atherosclerosis of nonautologous biological coronary artery bypass graft(s) with angina pectoris                  |
|  | I25730 | Atherosclerosis of nonautologous biological coronary artery bypass graft(s) with unstable angina pectoris         |

|  |        |                                                                                                                        |
|--|--------|------------------------------------------------------------------------------------------------------------------------|
|  | I25731 | Atherosclerosis of nonautologous biological coronary artery bypass graft(s) with angina pectoris with documented spasm |
|  | I25738 | Atherosclerosis of nonautologous biological coronary artery bypass graft(s) with other forms of angina pectoris        |
|  | I25739 | Atherosclerosis of nonautologous biological coronary artery bypass graft(s) with unspecified angina pectoris           |
|  | I2575  | Atherosclerosis of native coronary artery of transplanted heart with angina pectoris                                   |
|  | I25750 | Atherosclerosis of native coronary artery of transplanted heart with unstable angina                                   |
|  | I25751 | Atherosclerosis of native coronary artery of transplanted heart with angina pectoris with documented spasm             |
|  | I25758 | Atherosclerosis of native coronary artery of transplanted heart with other forms of angina pectoris                    |
|  | I25759 | Atherosclerosis of native coronary artery of transplanted heart with unspecified angina pectoris                       |
|  | I2576  | Atherosclerosis of bypass graft of coronary artery of transplanted heart with angina pectoris                          |
|  | I25760 | Atherosclerosis of bypass graft of coronary artery of transplanted heart with unstable angina                          |
|  | I25761 | Atherosclerosis of bypass graft of coronary artery of transplanted heart with angina pectoris with documented spasm    |
|  | I25768 | Atherosclerosis of bypass graft of coronary artery of transplanted heart with other forms of angina pectoris           |
|  | I25769 | Atherosclerosis of bypass graft of coronary artery of transplanted heart with unspecified angina pectoris              |
|  | I2579  | Atherosclerosis of other coronary artery bypass graft(s) with angina pectoris                                          |
|  | I25790 | Atherosclerosis of other coronary artery bypass graft(s) with unstable angina pectoris                                 |
|  | I25791 | Atherosclerosis of other coronary artery bypass graft(s) with angina pectoris with documented spasm                    |
|  | I25798 | Atherosclerosis of other coronary artery bypass graft(s) with other forms of angina pectoris                           |
|  | I25799 | Atherosclerosis of other coronary artery bypass graft(s) with unspecified angina pectoris                              |
|  | I258   | Other forms of chronic ischemic heart disease                                                                          |
|  | I2581  | Atherosclerosis of other coronary vessels without angina pectoris                                                      |
|  | I25810 | Atherosclerosis of coronary artery bypass graft(s) without angina pectoris                                             |
|  | I25811 | Atherosclerosis of native coronary artery of transplanted heart without angina pectoris                                |

|                              |        |                                                                                                  |
|------------------------------|--------|--------------------------------------------------------------------------------------------------|
|                              | I25812 | Atherosclerosis of bypass graft of coronary artery of transplanted heart without angina pectoris |
|                              | I2582  | Chronic total occlusion of coronary artery                                                       |
|                              | I2583  | Coronary atherosclerosis due to lipid rich plaque                                                |
|                              | I2584  | Coronary atherosclerosis due to calcified coronary lesion                                        |
|                              | I2589  | Other forms of chronic ischemic heart disease                                                    |
|                              | I259   | Chronic ischemic heart disease, unspecified                                                      |
|                              | Z824   | Family history of ischemic heart disease and other diseases of the circulatory system            |
|                              | Z8241  | Family history of sudden cardiac death                                                           |
|                              | Z8249  | Family history of ischemic heart disease and other diseases of the circulatory system            |
| Other Cardiovascular Disease | I280   | Arteriovenous fistula of pulmonary vessels                                                       |
|                              | I281   | Aneurysm of pulmonary artery                                                                     |
|                              | I288   | Other diseases of pulmonary vessels                                                              |
|                              | I289   | Disease of pulmonary vessels, unspecified                                                        |
|                              | I300   | Acute nonspecific idiopathic pericarditis                                                        |
|                              | I301   | Infective pericarditis                                                                           |
|                              | I308   | Other forms of acute pericarditis                                                                |
|                              | I309   | Acute pericarditis, unspecified                                                                  |
|                              | I310   | Chronic adhesive pericarditis                                                                    |
|                              | I311   | Chronic constrictive pericarditis                                                                |
|                              | I313   | Pericardial effusion (noninflammatory)                                                           |
|                              | I314   | Cardiac tamponade                                                                                |
|                              | I318   | Other specified diseases of pericardium                                                          |
|                              | I319   | Disease of pericardium, unspecified                                                              |
|                              | I32    | Pericarditis in diseases classified elsewhere                                                    |
|                              | I34    | Nonrheumatic mitral valve disorders                                                              |
|                              | I340   | Nonrheumatic mitral (valve) insufficiency                                                        |
|                              | I341   | Nonrheumatic mitral (valve) prolapse                                                             |
|                              | I342   | Nonrheumatic mitral (valve) stenosis                                                             |
|                              | I348   | Other nonrheumatic mitral valve disorders                                                        |
|                              | I349   | Nonrheumatic mitral valve disorder, unspecified                                                  |
|                              | I35    | Nonrheumatic aortic valve disorders                                                              |
|                              | I350   | Nonrheumatic aortic (valve) stenosis                                                             |
|                              | I351   | Nonrheumatic aortic (valve) insufficiency                                                        |
|                              | I352   | Nonrheumatic aortic (valve) stenosis with insufficiency                                          |
|                              | I358   | Other nonrheumatic aortic valve disorders                                                        |
|                              | I359   | Nonrheumatic aortic valve disorder, unspecified                                                  |
|                              | I36    | Nonrheumatic tricuspid valve disorders                                                           |
|                              | I360   | Nonrheumatic tricuspid (valve) stenosis                                                          |
|                              | I361   | Nonrheumatic tricuspid (valve) insufficiency                                                     |

|  |       |                                                                                       |
|--|-------|---------------------------------------------------------------------------------------|
|  | I362  | Nonrheumatic tricuspid (valve) stenosis with insufficiency                            |
|  | I368  | Other nonrheumatic tricuspid valve disorders                                          |
|  | I369  | Nonrheumatic tricuspid valve disorder, unspecified                                    |
|  | I37   | Nonrheumatic pulmonary valve disorders                                                |
|  | I370  | Nonrheumatic pulmonary valve stenosis                                                 |
|  | I371  | Nonrheumatic pulmonary valve insufficiency                                            |
|  | I372  | Nonrheumatic pulmonary valve stenosis with insufficiency                              |
|  | I378  | Other nonrheumatic pulmonary valve disorders                                          |
|  | I379  | Nonrheumatic pulmonary valve disorder, unspecified                                    |
|  | I720  | Aneurysm of carotid artery                                                            |
|  | I721  | Aneurysm of artery of upper extremity                                                 |
|  | I722  | Aneurysm of renal artery                                                              |
|  | I723  | Aneurysm of iliac artery                                                              |
|  | I724  | Aneurysm of artery of lower extremity                                                 |
|  | I728  | Aneurysm of other specified arteries                                                  |
|  | I729  | Aneurysm of unspecified site                                                          |
|  | I76   | Septic arterial embolism                                                              |
|  | I770  | Arteriovenous fistula, acquired                                                       |
|  | I771  | Stricture of artery                                                                   |
|  | I772  | Rupture of artery                                                                     |
|  | I773  | Arterial fibromuscular dysplasia                                                      |
|  | I774  | Celiac artery compression syndrome                                                    |
|  | I775  | Necrosis of artery                                                                    |
|  | I776  | Arteritis, unspecified                                                                |
|  | I779  | Disorder of arteries and arterioles, unspecified                                      |
|  | I780  | Hereditary hemorrhagic telangiectasia                                                 |
|  | I781  | Nevus, non-neoplastic                                                                 |
|  | I788  | Other diseases of capillaries                                                         |
|  | I789  | Disease of capillaries, unspecified                                                   |
|  | I80   | Phlebitis and thrombophlebitis                                                        |
|  | I800  | Phlebitis and thrombophlebitis of superficial vessels of lower extremities            |
|  | I8000 | Phlebitis and thrombophlebitis of superficial vessels of unspecified lower extremity  |
|  | I8001 | Phlebitis and thrombophlebitis of superficial vessels of right lower extremity        |
|  | I8002 | Phlebitis and thrombophlebitis of superficial vessels of left lower extremity         |
|  | I8003 | Phlebitis and thrombophlebitis of superficial vessels of lower extremities, bilateral |
|  | I801  | Phlebitis and thrombophlebitis of femoral vein                                        |
|  | I8010 | Phlebitis and thrombophlebitis of unspecified femoral vein                            |
|  | I8011 | Phlebitis and thrombophlebitis of right femoral vein                                  |

|  |        |                                                                                            |
|--|--------|--------------------------------------------------------------------------------------------|
|  | 18012  | Phlebitis and thrombophlebitis of left femoral vein                                        |
|  | 18013  | Phlebitis and thrombophlebitis of femoral vein, bilateral                                  |
|  | 1802   | Phlebitis and thrombophlebitis of other and unspecified deep vessels of lower extremities  |
|  | 18020  | Phlebitis and thrombophlebitis of unspecified deep vessels of lower extremities            |
|  | 180201 | Phlebitis and thrombophlebitis of unspecified deep vessels of right lower extremity        |
|  | 180202 | Phlebitis and thrombophlebitis of unspecified deep vessels of left lower extremity         |
|  | 180203 | Phlebitis and thrombophlebitis of unspecified deep vessels of lower extremities, bilateral |
|  | 180209 | Phlebitis and thrombophlebitis of unspecified deep vessels of unspecified lower extremity  |
|  | 18021  | Phlebitis and thrombophlebitis of iliac vein                                               |
|  | 180211 | Phlebitis and thrombophlebitis of right iliac vein                                         |
|  | 180212 | Phlebitis and thrombophlebitis of left iliac vein                                          |
|  | 180213 | Phlebitis and thrombophlebitis of iliac vein, bilateral                                    |
|  | 180219 | Phlebitis and thrombophlebitis of unspecified iliac vein                                   |
|  | 18022  | Phlebitis and thrombophlebitis of popliteal vein                                           |
|  | 180221 | Phlebitis and thrombophlebitis of right popliteal vein                                     |
|  | 180222 | Phlebitis and thrombophlebitis of left popliteal vein                                      |
|  | 180223 | Phlebitis and thrombophlebitis of popliteal vein, bilateral                                |
|  | 180229 | Phlebitis and thrombophlebitis of unspecified popliteal vein                               |
|  | 18023  | Phlebitis and thrombophlebitis of tibial vein                                              |
|  | 180231 | Phlebitis and thrombophlebitis of right tibial vein                                        |
|  | 180232 | Phlebitis and thrombophlebitis of left tibial vein                                         |
|  | 180233 | Phlebitis and thrombophlebitis of tibial vein, bilateral                                   |
|  | 180239 | Phlebitis and thrombophlebitis of unspecified tibial vein                                  |
|  | 18029  | Phlebitis and thrombophlebitis of other deep vessels of lower extremities                  |
|  | 180291 | Phlebitis and thrombophlebitis of other deep vessels of right lower extremity              |
|  | 180292 | Phlebitis and thrombophlebitis of other deep vessels of left lower extremity               |
|  | 180293 | Phlebitis and thrombophlebitis of other deep vessels of lower extremity, bilateral         |
|  | 180299 | Phlebitis and thrombophlebitis of other deep vessels of unspecified lower extremity        |
|  | 1803   | Phlebitis and thrombophlebitis of lower extremities, unspecified                           |
|  | 1808   | Phlebitis and thrombophlebitis of other sites                                              |
|  | 1809   | Phlebitis and thrombophlebitis of unspecified site                                         |
|  | 181    | Portal vein thrombosis                                                                     |

|  |        |                                                                                               |
|--|--------|-----------------------------------------------------------------------------------------------|
|  | 1810   |                                                                                               |
|  | 182    | Other venous embolism and thrombosis                                                          |
|  | 1820   | Budd-Chiari syndrome                                                                          |
|  | 1821   | Thrombophlebitis migrans                                                                      |
|  | 1822   | Embolism and thrombosis of vena cava and other thoracic veins                                 |
|  | 18221  | Embolism and thrombosis of superior vena cava                                                 |
|  | 182210 | Acute embolism and thrombosis of superior vena cava                                           |
|  | 182211 | Chronic embolism and thrombosis of superior vena cava                                         |
|  | 18222  | Embolism and thrombosis of inferior vena cava                                                 |
|  | 182220 | Acute embolism and thrombosis of inferior vena cava                                           |
|  | 182221 | Chronic embolism and thrombosis of inferior vena cava                                         |
|  | 18229  | Embolism and thrombosis of other thoracic veins                                               |
|  | 182290 | Acute embolism and thrombosis of other thoracic veins                                         |
|  | 182291 | Chronic embolism and thrombosis of other thoracic veins                                       |
|  | 1823   | Embolism and thrombosis of renal vein                                                         |
|  | 1824   | Acute embolism and thrombosis of unspecified deep veins of unspecified distal lower extremity |
|  | 18240  | Acute embolism and thrombosis of unspecified deep veins of lower extremity                    |
|  | 182401 | Acute embolism and thrombosis of unspecified deep veins of right lower extremity              |
|  | 182402 | Acute embolism and thrombosis of unspecified deep veins of left lower extremity               |
|  | 182403 | Acute embolism and thrombosis of unspecified deep veins of lower extremity, bilateral         |
|  | 182409 | Acute embolism and thrombosis of unspecified deep veins of unspecified lower extremity        |
|  | 18241  | Acute embolism and thrombosis of femoral vein                                                 |
|  | 182411 | Acute embolism and thrombosis of right femoral vein                                           |
|  | 182412 | Acute embolism and thrombosis of left femoral vein                                            |
|  | 182413 | Acute embolism and thrombosis of femoral vein, bilateral                                      |
|  | 182419 | Acute embolism and thrombosis of unspecified femoral vein                                     |
|  | 18242  | Acute embolism and thrombosis of iliac vein                                                   |
|  | 182421 | Acute embolism and thrombosis of right iliac vein                                             |
|  | 182422 | Acute embolism and thrombosis of left iliac vein                                              |
|  | 182423 | Acute embolism and thrombosis of iliac vein, bilateral                                        |
|  | 182429 | Acute embolism and thrombosis of unspecified iliac vein                                       |
|  | 18243  | Acute embolism and thrombosis of popliteal vein                                               |
|  | 182431 | Acute embolism and thrombosis of right popliteal vein                                         |
|  | 182432 | Acute embolism and thrombosis of left popliteal vein                                          |
|  | 182433 | Acute embolism and thrombosis of popliteal vein, bilateral                                    |
|  | 182439 | Acute embolism and thrombosis of unspecified popliteal vein                                   |
|  | 18244  | Acute embolism and thrombosis of tibial vein                                                  |



|  |        |                                                                                                 |
|--|--------|-------------------------------------------------------------------------------------------------|
|  | 182441 | Acute embolism and thrombosis of right tibial vein                                              |
|  | 182442 | Acute embolism and thrombosis of left tibial vein                                               |
|  | 182443 | Acute embolism and thrombosis of tibial vein, bilateral                                         |
|  | 182449 | Acute embolism and thrombosis of unspecified tibial vein                                        |
|  | 18249  | Acute embolism and thrombosis of other specified deep vein of lower extremity                   |
|  | 182491 | Acute embolism and thrombosis of other specified deep vein of right lower extremity             |
|  | 182492 | Acute embolism and thrombosis of other specified deep vein of left lower extremity              |
|  | 182493 | Acute embolism and thrombosis of other specified deep vein of lower extremity, bilateral        |
|  | 182499 | Acute embolism and thrombosis of other specified deep vein of unspecified lower extremity       |
|  | 1825   | Chronic embolism and thrombosis of unspecified deep veins of unspecified distal lower extremity |
|  | 18250  | Chronic embolism and thrombosis of unspecified deep veins of lower extremity                    |
|  | 182501 | Chronic embolism and thrombosis of unspecified deep veins of right lower extremity              |
|  | 182502 | Chronic embolism and thrombosis of unspecified deep veins of left lower extremity               |
|  | 182503 | Chronic embolism and thrombosis of unspecified deep veins of lower extremity, bilateral         |
|  | 182509 | Chronic embolism and thrombosis of unspecified deep veins of unspecified lower extremity        |
|  | 18251  | Chronic embolism and thrombosis of femoral vein                                                 |
|  | 182511 | Chronic embolism and thrombosis of right femoral vein                                           |
|  | 182512 | Chronic embolism and thrombosis of left femoral vein                                            |
|  | 182513 | Chronic embolism and thrombosis of femoral vein, bilateral                                      |
|  | 182519 | Chronic embolism and thrombosis of unspecified femoral vein                                     |
|  | 18252  | Chronic embolism and thrombosis of iliac vein                                                   |
|  | 182521 | Chronic embolism and thrombosis of right iliac vein                                             |
|  | 182522 | Chronic embolism and thrombosis of left iliac vein                                              |
|  | 182523 | Chronic embolism and thrombosis of iliac vein, bilateral                                        |
|  | 182529 | Chronic embolism and thrombosis of unspecified iliac vein                                       |
|  | 18253  | Chronic embolism and thrombosis of popliteal vein                                               |
|  | 182531 | Chronic embolism and thrombosis of right popliteal vein                                         |
|  | 182532 | Chronic embolism and thrombosis of left popliteal vein                                          |
|  | 182533 | Chronic embolism and thrombosis of popliteal vein, bilateral                                    |
|  | 182539 | Chronic embolism and thrombosis of unspecified popliteal vein                                   |
|  | 18254  | Chronic embolism and thrombosis of tibial vein                                                  |
|  | 182541 | Chronic embolism and thrombosis of right tibial vein                                            |

|  |        |                                                                                             |
|--|--------|---------------------------------------------------------------------------------------------|
|  | 182542 | Chronic embolism and thrombosis of left tibial vein                                         |
|  | 182543 | Chronic embolism and thrombosis of tibial vein, bilateral                                   |
|  | 182549 | Chronic embolism and thrombosis of unspecified tibial vein                                  |
|  | 18259  | Chronic embolism and thrombosis of other specified deep vein of lower extremity             |
|  | 182591 | Chronic embolism and thrombosis of other specified deep vein of right lower extremity       |
|  | 182592 | Chronic embolism and thrombosis of other specified deep vein of left lower extremity        |
|  | 182593 | Chronic embolism and thrombosis of other specified deep vein of lower extremity, bilateral  |
|  | 182599 | Chronic embolism and thrombosis of other specified deep vein of unspecified lower extremity |
|  | 1826   | Acute embolism and thrombosis of veins of upper extremity                                   |
|  | 18260  | Acute embolism and thrombosis of unspecified veins of upper extremity                       |
|  | 182601 | Acute embolism and thrombosis of unspecified veins of right upper extremity                 |
|  | 182602 | Acute embolism and thrombosis of unspecified veins of left upper extremity                  |
|  | 182603 | Acute embolism and thrombosis of unspecified veins of upper extremity, bilateral            |
|  | 182609 | Acute embolism and thrombosis of unspecified veins of unspecified upper extremity           |
|  | 18261  | Acute embolism and thrombosis of superficial veins of upper extremity                       |
|  | 182611 | Acute embolism and thrombosis of superficial veins of right upper extremity                 |
|  | 182612 | Acute embolism and thrombosis of superficial veins of left upper extremity                  |
|  | 182613 | Acute embolism and thrombosis of superficial veins of upper extremity, bilateral            |
|  | 182619 | Acute embolism and thrombosis of superficial veins of unspecified upper extremity           |
|  | 18262  | Acute embolism and thrombosis of deep veins of upper extremity                              |
|  | 182621 | Acute embolism and thrombosis of deep veins of right upper extremity                        |
|  | 182622 | Acute embolism and thrombosis of deep veins of left upper extremity                         |
|  | 182623 | Acute embolism and thrombosis of deep veins of upper extremity, bilateral                   |

|  |        |                                                                                     |
|--|--------|-------------------------------------------------------------------------------------|
|  | I82629 | Acute embolism and thrombosis of deep veins of unspecified upper extremity          |
|  | I827   | Chronic embolism and thrombosis of veins of upper extremity                         |
|  | I8270  | Chronic embolism and thrombosis of unspecified veins of upper extremity             |
|  | I82701 | Chronic embolism and thrombosis of unspecified veins of right upper extremity       |
|  | I82702 | Chronic embolism and thrombosis of unspecified veins of left upper extremity        |
|  | I82703 | Chronic embolism and thrombosis of unspecified veins of upper extremity, bilateral  |
|  | I82709 | Chronic embolism and thrombosis of unspecified veins of unspecified upper extremity |
|  | I8271  | Chronic embolism and thrombosis of superficial veins of upper extremity             |
|  | I82711 | Chronic embolism and thrombosis of superficial veins of right upper extremity       |
|  | I82712 | Chronic embolism and thrombosis of superficial veins of left upper extremity        |
|  | I82713 | Chronic embolism and thrombosis of superficial veins of upper extremity, bilateral  |
|  | I82719 | Chronic embolism and thrombosis of superficial veins of unspecified upper extremity |
|  | I8272  | Chronic embolism and thrombosis of deep veins of upper extremity                    |
|  | I82721 | Chronic embolism and thrombosis of deep veins of right upper extremity              |
|  | I82722 | Chronic embolism and thrombosis of deep veins of left upper extremity               |
|  | I82723 | Chronic embolism and thrombosis of deep veins of upper extremity, bilateral         |
|  | I82729 | Chronic embolism and thrombosis of deep veins of unspecified upper extremity        |
|  | I828   | Embolism and thrombosis of other specified veins                                    |
|  | I8281  | Embolism and thrombosis of superficial veins of lower extremities                   |
|  | I82811 | Embolism and thrombosis of superficial veins of right lower extremities             |
|  | I82812 | Embolism and thrombosis of superficial veins of left lower extremities              |
|  | I82813 | Embolism and thrombosis of superficial veins of lower extremities, bilateral        |
|  | I82819 | Embolism and thrombosis of superficial veins of unspecified lower extremities       |

|  |        |                                                                                  |
|--|--------|----------------------------------------------------------------------------------|
|  | I8289  | Embolism and thrombosis of other specified veins                                 |
|  | I82890 | Acute embolism and thrombosis of other specified veins                           |
|  | I82891 | Chronic embolism and thrombosis of other specified veins                         |
|  | I829   | Embolism and thrombosis of unspecified vein                                      |
|  | I8290  | Acute embolism and thrombosis of unspecified vein                                |
|  | I8291  | Chronic embolism and thrombosis of unspecified vein                              |
|  | I82A   | NA                                                                               |
|  | I82B   | NA                                                                               |
|  | I82C   | NA                                                                               |
|  | I83    | Varicose veins of lower extremities                                              |
|  | I830   | Varicose veins of lower extremities with ulcer                                   |
|  | I8300  | Varicose veins of unspecified lower extremity with ulcer                         |
|  | I83001 | Varicose veins of unspecified lower extremity with ulcer of thigh                |
|  | I83002 | Varicose veins of unspecified lower extremity with ulcer of calf                 |
|  | I83003 | Varicose veins of unspecified lower extremity with ulcer of ankle                |
|  | I83004 | Varicose veins of unspecified lower extremity with ulcer of heel and midfoot     |
|  | I83005 | Varicose veins of unspecified lower extremity with ulcer other part of foot      |
|  | I83008 | Varicose veins of unspecified lower extremity with ulcer other part of lower leg |
|  | I83009 | Varicose veins of unspecified lower extremity with ulcer of unspecified site     |
|  | I8301  | Varicose veins of right lower extremity with ulcer                               |
|  | I83011 | Varicose veins of right lower extremity with ulcer of thigh                      |
|  | I83012 | Varicose veins of right lower extremity with ulcer of calf                       |
|  | I83013 | Varicose veins of right lower extremity with ulcer of ankle                      |
|  | I83014 | Varicose veins of right lower extremity with ulcer of heel and midfoot           |
|  | I83015 | Varicose veins of right lower extremity with ulcer other part of foot            |
|  | I83018 | Varicose veins of right lower extremity with ulcer other part of lower leg       |
|  | I83019 | Varicose veins of right lower extremity with ulcer of unspecified site           |
|  | I8302  | Varicose veins of left lower extremity with ulcer                                |
|  | I83021 | Varicose veins of left lower extremity with ulcer of thigh                       |
|  | I83022 | Varicose veins of left lower extremity with ulcer of calf                        |
|  | I83023 | Varicose veins of left lower extremity with ulcer of ankle                       |
|  | I83024 | Varicose veins of left lower extremity with ulcer of heel and midfoot            |
|  | I83025 | Varicose veins of left lower extremity with ulcer other part of foot             |

|  |        |                                                                                                                 |
|--|--------|-----------------------------------------------------------------------------------------------------------------|
|  | 183028 | Varicose veins of left lower extremity with ulcer other part of lower leg                                       |
|  | 183029 | Varicose veins of left lower extremity with ulcer of unspecified site                                           |
|  | 1831   | Varicose veins of lower extremities with inflammation                                                           |
|  | 18310  | Varicose veins of unspecified lower extremity with inflammation                                                 |
|  | 18311  | Varicose veins of right lower extremity with inflammation                                                       |
|  | 18312  | Varicose veins of left lower extremity with inflammation                                                        |
|  | 1832   | Varicose veins of lower extremities with both ulcer and inflammation                                            |
|  | 18320  | Varicose veins of unspecified lower extremity with both ulcer and inflammation                                  |
|  | 183201 | Varicose veins of unspecified lower extremity with both ulcer of thigh and inflammation                         |
|  | 183202 | Varicose veins of unspecified lower extremity with both ulcer of calf and inflammation                          |
|  | 183203 | Varicose veins of unspecified lower extremity with both ulcer of ankle and inflammation                         |
|  | 183204 | Varicose veins of unspecified lower extremity with both ulcer of heel and midfoot and inflammation              |
|  | 183205 | Varicose veins of unspecified lower extremity with both ulcer other part of foot and inflammation               |
|  | 183208 | Varicose veins of unspecified lower extremity with both ulcer of other part of lower extremity and inflammation |
|  | 183209 | Varicose veins of unspecified lower extremity with both ulcer of unspecified site and inflammation              |
|  | 18321  | Varicose veins of right lower extremity with both ulcer and inflammation                                        |
|  | 183211 | Varicose veins of right lower extremity with both ulcer of thigh and inflammation                               |
|  | 183212 | Varicose veins of right lower extremity with both ulcer of calf and inflammation                                |
|  | 183213 | Varicose veins of right lower extremity with both ulcer of ankle and inflammation                               |
|  | 183214 | Varicose veins of right lower extremity with both ulcer of heel and midfoot and inflammation                    |
|  | 183215 | Varicose veins of right lower extremity with both ulcer other part of foot and inflammation                     |
|  | 183218 | Varicose veins of right lower extremity with both ulcer of other part of lower extremity and inflammation       |
|  | 183219 | Varicose veins of right lower extremity with both ulcer of unspecified site and inflammation                    |

|  |        |                                                                                                          |
|--|--------|----------------------------------------------------------------------------------------------------------|
|  | 18322  | Varicose veins of left lower extremity with both ulcer and inflammation                                  |
|  | 183221 | Varicose veins of left lower extremity with both ulcer of thigh and inflammation                         |
|  | 183222 | Varicose veins of left lower extremity with both ulcer of calf and inflammation                          |
|  | 183223 | Varicose veins of left lower extremity with both ulcer of ankle and inflammation                         |
|  | 183224 | Varicose veins of left lower extremity with both ulcer of heel and midfoot and inflammation              |
|  | 183225 | Varicose veins of left lower extremity with both ulcer other part of foot and inflammation               |
|  | 183228 | Varicose veins of left lower extremity with both ulcer of other part of lower extremity and inflammation |
|  | 183229 | Varicose veins of left lower extremity with both ulcer of unspecified site and inflammation              |
|  | 1838   | Varicose veins of lower extremities with other complications                                             |
|  | 18381  | Varicose veins of lower extremities with pain                                                            |
|  | 183811 | Varicose veins of right lower extremities with pain                                                      |
|  | 183812 | Varicose veins of left lower extremities with pain                                                       |
|  | 183813 | Varicose veins of bilateral lower extremities with pain                                                  |
|  | 183819 | Varicose veins of unspecified lower extremities with pain                                                |
|  | 18389  | Varicose veins of lower extremities with other complications                                             |
|  | 183891 | Varicose veins of right lower extremities with other complications                                       |
|  | 183892 | Varicose veins of left lower extremities with other complications                                        |
|  | 183893 | Varicose veins of bilateral lower extremities with other complications                                   |
|  | 183899 | Varicose veins of unspecified lower extremities with other complications                                 |
|  | 1839   | Asymptomatic varicose veins of lower extremities                                                         |
|  | 18390  | Asymptomatic varicose veins of unspecified lower extremity                                               |
|  | 18391  | Asymptomatic varicose veins of right lower extremity                                                     |
|  | 18392  | Asymptomatic varicose veins of left lower extremity                                                      |
|  | 18393  | Asymptomatic varicose veins of bilateral lower extremities                                               |
|  | 1860   | Sublingual varices                                                                                       |
|  | 1861   | Scrotal varices                                                                                          |
|  | 1862   | Pelvic varices                                                                                           |
|  | 1863   | Vulval varices                                                                                           |
|  | 1864   | Gastric varices                                                                                          |
|  | 1868   | Varicose veins of other specified sites                                                                  |
|  | 1870   | Postthrombotic syndrome                                                                                  |
|  | 18700  | Postthrombotic syndrome without complications                                                            |

|  |        |                                                                                    |
|--|--------|------------------------------------------------------------------------------------|
|  | I87001 | Postthrombotic syndrome without complications of right lower extremity             |
|  | I87002 | Postthrombotic syndrome without complications of left lower extremity              |
|  | I87003 | Postthrombotic syndrome without complications of bilateral lower extremity         |
|  | I87009 | Postthrombotic syndrome without complications of unspecified extremity             |
|  | I8701  | Postthrombotic syndrome with ulcer                                                 |
|  | I87011 | Postthrombotic syndrome with ulcer of right lower extremity                        |
|  | I87012 | Postthrombotic syndrome with ulcer of left lower extremity                         |
|  | I87013 | Postthrombotic syndrome with ulcer of bilateral lower extremity                    |
|  | I87019 | Postthrombotic syndrome with ulcer of unspecified lower extremity                  |
|  | I8702  | Postthrombotic syndrome with inflammation                                          |
|  | I87021 | Postthrombotic syndrome with inflammation of right lower extremity                 |
|  | I87022 | Postthrombotic syndrome with inflammation of left lower extremity                  |
|  | I87023 | Postthrombotic syndrome with inflammation of bilateral lower extremity             |
|  | I87029 | Postthrombotic syndrome with inflammation of unspecified lower extremity           |
|  | I8703  | Postthrombotic syndrome with ulcer and inflammation                                |
|  | I87031 | Postthrombotic syndrome with ulcer and inflammation of right lower extremity       |
|  | I87032 | Postthrombotic syndrome with ulcer and inflammation of left lower extremity        |
|  | I87033 | Postthrombotic syndrome with ulcer and inflammation of bilateral lower extremity   |
|  | I87039 | Postthrombotic syndrome with ulcer and inflammation of unspecified lower extremity |
|  | I8709  | Postthrombotic syndrome with other complications                                   |
|  | I87091 | Postthrombotic syndrome with other complications of right lower extremity          |
|  | I87092 | Postthrombotic syndrome with other complications of left lower extremity           |
|  | I87093 | Postthrombotic syndrome with other complications of bilateral lower extremity      |
|  | I87099 | Postthrombotic syndrome with other complications of unspecified lower extremity    |
|  | I871   | Compression of vein                                                                |
|  | I890   | Lymphedema, not elsewhere classified                                               |

|                             |        |                                                                                                         |
|-----------------------------|--------|---------------------------------------------------------------------------------------------------------|
|                             | 1898   | Other specified noninfective disorders of lymphatic vessels and lymph nodes                             |
|                             | 1899   | Noninfective disorder of lymphatic vessels and lymph nodes, unspecified                                 |
|                             | M318   | Other specified necrotizing vasculopathies                                                              |
|                             | M319   | Necrotizing vasculopathy, unspecified                                                                   |
| Peripheral Arterial Disease | I670   | Dissection of cerebral arteries, nonruptured                                                            |
|                             | I702   | Atherosclerosis of native arteries of the extremities                                                   |
|                             | I7020  | Unspecified atherosclerosis of native arteries of extremities                                           |
|                             | I70201 | Unspecified atherosclerosis of native arteries of extremities, right leg                                |
|                             | I70202 | Unspecified atherosclerosis of native arteries of extremities, left leg                                 |
|                             | I70203 | Unspecified atherosclerosis of native arteries of extremities, bilateral legs                           |
|                             | I70208 | Unspecified atherosclerosis of native arteries of extremities, other extremity                          |
|                             | I70209 | Unspecified atherosclerosis of native arteries of extremities, unspecified extremity                    |
|                             | I7021  | Atherosclerosis of native arteries of extremities with intermittent claudication                        |
|                             | I70211 | Atherosclerosis of native arteries of extremities with intermittent claudication, right leg             |
|                             | I70212 | Atherosclerosis of native arteries of extremities with intermittent claudication, left leg              |
|                             | I70213 | Atherosclerosis of native arteries of extremities with intermittent claudication, bilateral legs        |
|                             | I70218 | Atherosclerosis of native arteries of extremities with intermittent claudication, other extremity       |
|                             | I70219 | Atherosclerosis of native arteries of extremities with intermittent claudication, unspecified extremity |
|                             | I7022  | Atherosclerosis of native arteries of extremities with rest pain                                        |
|                             | I70221 | Atherosclerosis of native arteries of extremities with rest pain, right leg                             |
|                             | I70222 | Atherosclerosis of native arteries of extremities with rest pain, left leg                              |
|                             | I70223 | Atherosclerosis of native arteries of extremities with rest pain, bilateral legs                        |
|                             | I70228 | Atherosclerosis of native arteries of extremities with rest pain, other extremity                       |
|                             | I70229 | Atherosclerosis of native arteries of extremities with rest pain, unspecified extremity                 |
|                             | I7023  | Atherosclerosis of native arteries of right leg with ulceration                                         |



|  |        |                                                                                                  |
|--|--------|--------------------------------------------------------------------------------------------------|
|  | 170231 | Atherosclerosis of native arteries of right leg with ulceration of thigh                         |
|  | 170232 | Atherosclerosis of native arteries of right leg with ulceration of calf                          |
|  | 170233 | Atherosclerosis of native arteries of right leg with ulceration of ankle                         |
|  | 170234 | Atherosclerosis of native arteries of right leg with ulceration of heel and midfoot              |
|  | 170235 | Atherosclerosis of native arteries of right leg with ulceration of other part of foot            |
|  | 170238 | Atherosclerosis of native arteries of right leg with ulceration of other part of lower right leg |
|  | 170239 | Atherosclerosis of native arteries of right leg with ulceration of unspecified site              |
|  | 17024  | Atherosclerosis of native arteries of left leg with ulceration                                   |
|  | 170241 | Atherosclerosis of native arteries of left leg with ulceration of thigh                          |
|  | 170242 | Atherosclerosis of native arteries of left leg with ulceration of calf                           |
|  | 170243 | Atherosclerosis of native arteries of left leg with ulceration of ankle                          |
|  | 170244 | Atherosclerosis of native arteries of left leg with ulceration of heel and midfoot               |
|  | 170245 | Atherosclerosis of native arteries of left leg with ulceration of other part of foot             |
|  | 170248 | Atherosclerosis of native arteries of left leg with ulceration of other part of lower left leg   |
|  | 170249 | Atherosclerosis of native arteries of left leg with ulceration of unspecified site               |
|  | 17025  | Atherosclerosis of native arteries of other extremities with ulceration                          |
|  | 17026  | Atherosclerosis of native arteries of extremities with gangrene                                  |
|  | 170261 | Atherosclerosis of native arteries of extremities with gangrene, right leg                       |
|  | 170262 | Atherosclerosis of native arteries of extremities with gangrene, left leg                        |
|  | 170263 | Atherosclerosis of native arteries of extremities with gangrene, bilateral legs                  |
|  | 170268 | Atherosclerosis of native arteries of extremities with gangrene, other extremity                 |
|  | 170269 | Atherosclerosis of native arteries of extremities with gangrene, unspecified extremity           |
|  | 17029  | Other atherosclerosis of native arteries of extremities                                          |
|  | 170291 | Other atherosclerosis of native arteries of extremities, right leg                               |

|  |        |                                                                                                                                 |
|--|--------|---------------------------------------------------------------------------------------------------------------------------------|
|  | 170292 | Other atherosclerosis of native arteries of extremities, left leg                                                               |
|  | 170293 | Other atherosclerosis of native arteries of extremities, bilateral legs                                                         |
|  | 170298 | Other atherosclerosis of native arteries of extremities, other extremity                                                        |
|  | 170299 | Other atherosclerosis of native arteries of extremities, unspecified extremity                                                  |
|  | 1703   | Atherosclerosis of unspecified type of bypass graft(s) of the extremities                                                       |
|  | 17030  | Unspecified atherosclerosis of unspecified type of bypass graft(s) of the extremities                                           |
|  | 170301 | Unspecified atherosclerosis of unspecified type of bypass graft(s) of the extremities, right leg                                |
|  | 170302 | Unspecified atherosclerosis of unspecified type of bypass graft(s) of the extremities, left leg                                 |
|  | 170303 | Unspecified atherosclerosis of unspecified type of bypass graft(s) of the extremities, bilateral legs                           |
|  | 170308 | Unspecified atherosclerosis of unspecified type of bypass graft(s) of the extremities, other extremity                          |
|  | 170309 | Unspecified atherosclerosis of unspecified type of bypass graft(s) of the extremities, unspecified extremity                    |
|  | 17031  | Atherosclerosis of unspecified type of bypass graft(s) of the extremities with intermittent claudication                        |
|  | 170311 | Atherosclerosis of unspecified type of bypass graft(s) of the extremities with intermittent claudication, right leg             |
|  | 170312 | Atherosclerosis of unspecified type of bypass graft(s) of the extremities with intermittent claudication, left leg              |
|  | 170313 | Atherosclerosis of unspecified type of bypass graft(s) of the extremities with intermittent claudication, bilateral legs        |
|  | 170318 | Atherosclerosis of unspecified type of bypass graft(s) of the extremities with intermittent claudication, other extremity       |
|  | 170319 | Atherosclerosis of unspecified type of bypass graft(s) of the extremities with intermittent claudication, unspecified extremity |
|  | 17032  | Atherosclerosis of unspecified type of bypass graft(s) of the extremities with rest pain                                        |
|  | 170321 | Atherosclerosis of unspecified type of bypass graft(s) of the extremities with rest pain, right leg                             |
|  | 170322 | Atherosclerosis of unspecified type of bypass graft(s) of the extremities with rest pain, left leg                              |
|  | 170323 | Atherosclerosis of unspecified type of bypass graft(s) of the extremities with rest pain, bilateral legs                        |
|  | 170328 | Atherosclerosis of unspecified type of bypass graft(s) of the extremities with rest pain, other extremity                       |

|  |        |                                                                                                                    |
|--|--------|--------------------------------------------------------------------------------------------------------------------|
|  | 170329 | Atherosclerosis of unspecified type of bypass graft(s) of the extremities with rest pain, unspecified extremity    |
|  | 17033  | Atherosclerosis of unspecified type of bypass graft(s) of the right leg with ulceration                            |
|  | 170331 | Atherosclerosis of unspecified type of bypass graft(s) of the right leg with ulceration of thigh                   |
|  | 170332 | Atherosclerosis of unspecified type of bypass graft(s) of the right leg with ulceration of calf                    |
|  | 170333 | Atherosclerosis of unspecified type of bypass graft(s) of the right leg with ulceration of ankle                   |
|  | 170334 | Atherosclerosis of unspecified type of bypass graft(s) of the right leg with ulceration of heel and midfoot        |
|  | 170335 | Atherosclerosis of unspecified type of bypass graft(s) of the right leg with ulceration of other part of foot      |
|  | 170338 | Atherosclerosis of unspecified type of bypass graft(s) of the right leg with ulceration of other part of lower leg |
|  | 170339 | Atherosclerosis of unspecified type of bypass graft(s) of the right leg with ulceration of unspecified site        |
|  | 17034  | Atherosclerosis of unspecified type of bypass graft(s) of the left leg with ulceration                             |
|  | 170341 | Atherosclerosis of unspecified type of bypass graft(s) of the left leg with ulceration of thigh                    |
|  | 170342 | Atherosclerosis of unspecified type of bypass graft(s) of the left leg with ulceration of calf                     |
|  | 170343 | Atherosclerosis of unspecified type of bypass graft(s) of the left leg with ulceration of ankle                    |
|  | 170344 | Atherosclerosis of unspecified type of bypass graft(s) of the left leg with ulceration of heel and midfoot         |
|  | 170345 | Atherosclerosis of unspecified type of bypass graft(s) of the left leg with ulceration of other part of foot       |
|  | 170348 | Atherosclerosis of unspecified type of bypass graft(s) of the left leg with ulceration of other part of lower leg  |
|  | 170349 | Atherosclerosis of unspecified type of bypass graft(s) of the left leg with ulceration of unspecified site         |
|  | 17035  | Atherosclerosis of unspecified type of bypass graft(s) of other extremity with ulceration                          |
|  | 17036  | Atherosclerosis of unspecified type of bypass graft(s) of the extremities with gangrene                            |
|  | 170361 | Atherosclerosis of unspecified type of bypass graft(s) of the extremities with gangrene, right leg                 |
|  | 170362 | Atherosclerosis of unspecified type of bypass graft(s) of the extremities with gangrene, left leg                  |

|  |        |                                                                                                                             |
|--|--------|-----------------------------------------------------------------------------------------------------------------------------|
|  | 170363 | Atherosclerosis of unspecified type of bypass graft(s) of the extremities with gangrene, bilateral legs                     |
|  | 170368 | Atherosclerosis of unspecified type of bypass graft(s) of the extremities with gangrene, other extremity                    |
|  | 170369 | Atherosclerosis of unspecified type of bypass graft(s) of the extremities with gangrene, unspecified extremity              |
|  | 17039  | Other atherosclerosis of unspecified type of bypass graft(s) of the extremities                                             |
|  | 170391 | Other atherosclerosis of unspecified type of bypass graft(s) of the extremities, right leg                                  |
|  | 170392 | Other atherosclerosis of unspecified type of bypass graft(s) of the extremities, left leg                                   |
|  | 170393 | Other atherosclerosis of unspecified type of bypass graft(s) of the extremities, bilateral legs                             |
|  | 170398 | Other atherosclerosis of unspecified type of bypass graft(s) of the extremities, other extremity                            |
|  | 170399 | Other atherosclerosis of unspecified type of bypass graft(s) of the extremities, unspecified extremity                      |
|  | 1704   | Atherosclerosis of autologous vein bypass graft(s) of the extremities                                                       |
|  | 17040  | Unspecified atherosclerosis of autologous vein bypass graft(s) of the extremities                                           |
|  | 170401 | Unspecified atherosclerosis of autologous vein bypass graft(s) of the extremities, right leg                                |
|  | 170402 | Unspecified atherosclerosis of autologous vein bypass graft(s) of the extremities, left leg                                 |
|  | 170403 | Unspecified atherosclerosis of autologous vein bypass graft(s) of the extremities, bilateral legs                           |
|  | 170408 | Unspecified atherosclerosis of autologous vein bypass graft(s) of the extremities, other extremity                          |
|  | 170409 | Unspecified atherosclerosis of autologous vein bypass graft(s) of the extremities, unspecified extremity                    |
|  | 17041  | Atherosclerosis of autologous vein bypass graft(s) of the extremities with intermittent claudication                        |
|  | 170411 | Atherosclerosis of autologous vein bypass graft(s) of the extremities with intermittent claudication, right leg             |
|  | 170412 | Atherosclerosis of autologous vein bypass graft(s) of the extremities with intermittent claudication, left leg              |
|  | 170413 | Atherosclerosis of autologous vein bypass graft(s) of the extremities with intermittent claudication, bilateral legs        |
|  | 170418 | Atherosclerosis of autologous vein bypass graft(s) of the extremities with intermittent claudication, other extremity       |
|  | 170419 | Atherosclerosis of autologous vein bypass graft(s) of the extremities with intermittent claudication, unspecified extremity |

|  |        |                                                                                                                |
|--|--------|----------------------------------------------------------------------------------------------------------------|
|  | 17042  | Atherosclerosis of autologous vein bypass graft(s) of the extremities with rest pain                           |
|  | 170421 | Atherosclerosis of autologous vein bypass graft(s) of the extremities with rest pain, right leg                |
|  | 170422 | Atherosclerosis of autologous vein bypass graft(s) of the extremities with rest pain, left leg                 |
|  | 170423 | Atherosclerosis of autologous vein bypass graft(s) of the extremities with rest pain, bilateral legs           |
|  | 170428 | Atherosclerosis of autologous vein bypass graft(s) of the extremities with rest pain, other extremity          |
|  | 170429 | Atherosclerosis of autologous vein bypass graft(s) of the extremities with rest pain, unspecified extremity    |
|  | 17043  | Atherosclerosis of autologous vein bypass graft(s) of the right leg with ulceration                            |
|  | 170431 | Atherosclerosis of autologous vein bypass graft(s) of the right leg with ulceration of thigh                   |
|  | 170432 | Atherosclerosis of autologous vein bypass graft(s) of the right leg with ulceration of calf                    |
|  | 170433 | Atherosclerosis of autologous vein bypass graft(s) of the right leg with ulceration of ankle                   |
|  | 170434 | Atherosclerosis of autologous vein bypass graft(s) of the right leg with ulceration of heel and midfoot        |
|  | 170435 | Atherosclerosis of autologous vein bypass graft(s) of the right leg with ulceration of other part of foot      |
|  | 170438 | Atherosclerosis of autologous vein bypass graft(s) of the right leg with ulceration of other part of lower leg |
|  | 170439 | Atherosclerosis of autologous vein bypass graft(s) of the right leg with ulceration of unspecified site        |
|  | 17044  | Atherosclerosis of autologous vein bypass graft(s) of the left leg with ulceration                             |
|  | 170441 | Atherosclerosis of autologous vein bypass graft(s) of the left leg with ulceration of thigh                    |
|  | 170442 | Atherosclerosis of autologous vein bypass graft(s) of the left leg with ulceration of calf                     |
|  | 170443 | Atherosclerosis of autologous vein bypass graft(s) of the left leg with ulceration of ankle                    |
|  | 170444 | Atherosclerosis of autologous vein bypass graft(s) of the left leg with ulceration of heel and midfoot         |
|  | 170445 | Atherosclerosis of autologous vein bypass graft(s) of the left leg with ulceration of other part of foot       |
|  | 170448 | Atherosclerosis of autologous vein bypass graft(s) of the left leg with ulceration of other part of lower leg  |

|  |        |                                                                                                                   |
|--|--------|-------------------------------------------------------------------------------------------------------------------|
|  | 170449 | Atherosclerosis of autologous vein bypass graft(s) of the left leg with ulceration of unspecified site            |
|  | 17045  | Atherosclerosis of autologous vein bypass graft(s) of other extremity with ulceration                             |
|  | 17046  | Atherosclerosis of autologous vein bypass graft(s) of the extremities with gangrene                               |
|  | 170461 | Atherosclerosis of autologous vein bypass graft(s) of the extremities with gangrene, right leg                    |
|  | 170462 | Atherosclerosis of autologous vein bypass graft(s) of the extremities with gangrene, left leg                     |
|  | 170463 | Atherosclerosis of autologous vein bypass graft(s) of the extremities with gangrene, bilateral legs               |
|  | 170468 | Atherosclerosis of autologous vein bypass graft(s) of the extremities with gangrene, other extremity              |
|  | 170469 | Atherosclerosis of autologous vein bypass graft(s) of the extremities with gangrene, unspecified extremity        |
|  | 17049  | Other atherosclerosis of autologous vein bypass graft(s) of the extremities                                       |
|  | 170491 | Other atherosclerosis of autologous vein bypass graft(s) of the extremities, right leg                            |
|  | 170492 | Other atherosclerosis of autologous vein bypass graft(s) of the extremities, left leg                             |
|  | 170493 | Other atherosclerosis of autologous vein bypass graft(s) of the extremities, bilateral legs                       |
|  | 170498 | Other atherosclerosis of autologous vein bypass graft(s) of the extremities, other extremity                      |
|  | 170499 | Other atherosclerosis of autologous vein bypass graft(s) of the extremities, unspecified extremity                |
|  | 1705   | Atherosclerosis of nonautologous biological bypass graft(s) of the extremities                                    |
|  | 17050  | Unspecified atherosclerosis of nonautologous biological bypass graft(s) of the extremities                        |
|  | 170501 | Unspecified atherosclerosis of nonautologous biological bypass graft(s) of the extremities, right leg             |
|  | 170502 | Unspecified atherosclerosis of nonautologous biological bypass graft(s) of the extremities, left leg              |
|  | 170503 | Unspecified atherosclerosis of nonautologous biological bypass graft(s) of the extremities, bilateral legs        |
|  | 170508 | Unspecified atherosclerosis of nonautologous biological bypass graft(s) of the extremities, other extremity       |
|  | 170509 | Unspecified atherosclerosis of nonautologous biological bypass graft(s) of the extremities, unspecified extremity |

|  |        |                                                                                                                                      |
|--|--------|--------------------------------------------------------------------------------------------------------------------------------------|
|  | 17051  | Atherosclerosis of nonautologous biological bypass graft(s) of the extremities intermittent claudication                             |
|  | 170511 | Atherosclerosis of nonautologous biological bypass graft(s) of the extremities with intermittent claudication, right leg             |
|  | 170512 | Atherosclerosis of nonautologous biological bypass graft(s) of the extremities with intermittent claudication, left leg              |
|  | 170513 | Atherosclerosis of nonautologous biological bypass graft(s) of the extremities with intermittent claudication, bilateral legs        |
|  | 170518 | Atherosclerosis of nonautologous biological bypass graft(s) of the extremities with intermittent claudication, other extremity       |
|  | 170519 | Atherosclerosis of nonautologous biological bypass graft(s) of the extremities with intermittent claudication, unspecified extremity |
|  | 17052  | Atherosclerosis of nonautologous biological bypass graft(s) of the extremities with rest pain                                        |
|  | 170521 | Atherosclerosis of nonautologous biological bypass graft(s) of the extremities with rest pain, right leg                             |
|  | 170522 | Atherosclerosis of nonautologous biological bypass graft(s) of the extremities with rest pain, left leg                              |
|  | 170523 | Atherosclerosis of nonautologous biological bypass graft(s) of the extremities with rest pain, bilateral legs                        |
|  | 170528 | Atherosclerosis of nonautologous biological bypass graft(s) of the extremities with rest pain, other extremity                       |
|  | 170529 | Atherosclerosis of nonautologous biological bypass graft(s) of the extremities with rest pain, unspecified extremity                 |
|  | 17053  | Atherosclerosis of nonautologous biological bypass graft(s) of the right leg with ulceration                                         |
|  | 170531 | Atherosclerosis of nonautologous biological bypass graft(s) of the right leg with ulceration of thigh                                |
|  | 170532 | Atherosclerosis of nonautologous biological bypass graft(s) of the right leg with ulceration of calf                                 |
|  | 170533 | Atherosclerosis of nonautologous biological bypass graft(s) of the right leg with ulceration of ankle                                |
|  | 170534 | Atherosclerosis of nonautologous biological bypass graft(s) of the right leg with ulceration of heel and midfoot                     |
|  | 170535 | Atherosclerosis of nonautologous biological bypass graft(s) of the right leg with ulceration of other part of foot                   |
|  | 170538 | Atherosclerosis of nonautologous biological bypass graft(s) of the right leg with ulceration of other part of lower leg              |
|  | 170539 | Atherosclerosis of nonautologous biological bypass graft(s) of the right leg with ulceration of unspecified site                     |
|  | 17054  | Atherosclerosis of nonautologous biological bypass graft(s) of the left leg with ulceration                                          |

|  |        |                                                                                                                        |
|--|--------|------------------------------------------------------------------------------------------------------------------------|
|  | 170541 | Atherosclerosis of nonautologous biological bypass graft(s) of the left leg with ulceration of thigh                   |
|  | 170542 | Atherosclerosis of nonautologous biological bypass graft(s) of the left leg with ulceration of calf                    |
|  | 170543 | Atherosclerosis of nonautologous biological bypass graft(s) of the left leg with ulceration of ankle                   |
|  | 170544 | Atherosclerosis of nonautologous biological bypass graft(s) of the left leg with ulceration of heel and midfoot        |
|  | 170545 | Atherosclerosis of nonautologous biological bypass graft(s) of the left leg with ulceration of other part of foot      |
|  | 170548 | Atherosclerosis of nonautologous biological bypass graft(s) of the left leg with ulceration of other part of lower leg |
|  | 170549 | Atherosclerosis of nonautologous biological bypass graft(s) of the left leg with ulceration of unspecified site        |
|  | 17055  | Atherosclerosis of nonautologous biological bypass graft(s) of other extremity with ulceration                         |
|  | 17056  | Atherosclerosis of nonautologous biological bypass graft(s) of the extremities with gangrene                           |
|  | 170561 | Atherosclerosis of nonautologous biological bypass graft(s) of the extremities with gangrene, right leg                |
|  | 170562 | Atherosclerosis of nonautologous biological bypass graft(s) of the extremities with gangrene, left leg                 |
|  | 170563 | Atherosclerosis of nonautologous biological bypass graft(s) of the extremities with gangrene, bilateral legs           |
|  | 170568 | Atherosclerosis of nonautologous biological bypass graft(s) of the extremities with gangrene, other extremity          |
|  | 170569 | Atherosclerosis of nonautologous biological bypass graft(s) of the extremities with gangrene, unspecified extremity    |
|  | 17059  | Other atherosclerosis of nonautologous biological bypass graft(s) of the extremities                                   |
|  | 170591 | Other atherosclerosis of nonautologous biological bypass graft(s) of the extremities, right leg                        |
|  | 170592 | Other atherosclerosis of nonautologous biological bypass graft(s) of the extremities, left leg                         |
|  | 170593 | Other atherosclerosis of nonautologous biological bypass graft(s) of the extremities, bilateral legs                   |
|  | 170598 | Other atherosclerosis of nonautologous biological bypass graft(s) of the extremities, other extremity                  |
|  | 170599 | Other atherosclerosis of nonautologous biological bypass graft(s) of the extremities, unspecified extremity            |
|  | 1706   | Atherosclerosis of nonbiological bypass graft(s) of the extremities                                                    |
|  | 17060  | Unspecified atherosclerosis of nonbiological bypass graft(s) of the extremities                                        |



|  |        |                                                                                                                           |
|--|--------|---------------------------------------------------------------------------------------------------------------------------|
|  | 170601 | Unspecified atherosclerosis of nonbiological bypass graft(s) of the extremities, right leg                                |
|  | 170602 | Unspecified atherosclerosis of nonbiological bypass graft(s) of the extremities, left leg                                 |
|  | 170603 | Unspecified atherosclerosis of nonbiological bypass graft(s) of the extremities, bilateral legs                           |
|  | 170608 | Unspecified atherosclerosis of nonbiological bypass graft(s) of the extremities, other extremity                          |
|  | 170609 | Unspecified atherosclerosis of nonbiological bypass graft(s) of the extremities, unspecified extremity                    |
|  | 17061  | Atherosclerosis of nonbiological bypass graft(s) of the extremities with intermittent claudication                        |
|  | 170611 | Atherosclerosis of nonbiological bypass graft(s) of the extremities with intermittent claudication, right leg             |
|  | 170612 | Atherosclerosis of nonbiological bypass graft(s) of the extremities with intermittent claudication, left leg              |
|  | 170613 | Atherosclerosis of nonbiological bypass graft(s) of the extremities with intermittent claudication, bilateral legs        |
|  | 170618 | Atherosclerosis of nonbiological bypass graft(s) of the extremities with intermittent claudication, other extremity       |
|  | 170619 | Atherosclerosis of nonbiological bypass graft(s) of the extremities with intermittent claudication, unspecified extremity |
|  | 17062  | Atherosclerosis of nonbiological bypass graft(s) of the extremities with rest pain                                        |
|  | 170621 | Atherosclerosis of nonbiological bypass graft(s) of the extremities with rest pain, right leg                             |
|  | 170622 | Atherosclerosis of nonbiological bypass graft(s) of the extremities with rest pain, left leg                              |
|  | 170623 | Atherosclerosis of nonbiological bypass graft(s) of the extremities with rest pain, bilateral legs                        |
|  | 170628 | Atherosclerosis of nonbiological bypass graft(s) of the extremities with rest pain, other extremity                       |
|  | 170629 | Atherosclerosis of nonbiological bypass graft(s) of the extremities with rest pain, unspecified extremity                 |
|  | 17063  | Atherosclerosis of nonbiological bypass graft(s) of the right leg with ulceration                                         |
|  | 170631 | Atherosclerosis of nonbiological bypass graft(s) of the right leg with ulceration of thigh                                |
|  | 170632 | Atherosclerosis of nonbiological bypass graft(s) of the right leg with ulceration of calf                                 |
|  | 170633 | Atherosclerosis of nonbiological bypass graft(s) of the right leg with ulceration of ankle                                |

|  |        |                                                                                                              |
|--|--------|--------------------------------------------------------------------------------------------------------------|
|  | 170634 | Atherosclerosis of nonbiological bypass graft(s) of the right leg with ulceration of heel and midfoot        |
|  | 170635 | Atherosclerosis of nonbiological bypass graft(s) of the right leg with ulceration of other part of foot      |
|  | 170638 | Atherosclerosis of nonbiological bypass graft(s) of the right leg with ulceration of other part of lower leg |
|  | 170639 | Atherosclerosis of nonbiological bypass graft(s) of the right leg with ulceration of unspecified site        |
|  | 17064  | Atherosclerosis of nonbiological bypass graft(s) of the left leg with ulceration                             |
|  | 170641 | Atherosclerosis of nonbiological bypass graft(s) of the left leg with ulceration of thigh                    |
|  | 170642 | Atherosclerosis of nonbiological bypass graft(s) of the left leg with ulceration of calf                     |
|  | 170643 | Atherosclerosis of nonbiological bypass graft(s) of the left leg with ulceration of ankle                    |
|  | 170644 | Atherosclerosis of nonbiological bypass graft(s) of the left leg with ulceration of heel and midfoot         |
|  | 170645 | Atherosclerosis of nonbiological bypass graft(s) of the left leg with ulceration of other part of foot       |
|  | 170648 | Atherosclerosis of nonbiological bypass graft(s) of the left leg with ulceration of other part of lower leg  |
|  | 170649 | Atherosclerosis of nonbiological bypass graft(s) of the left leg with ulceration of unspecified site         |
|  | 17065  | Atherosclerosis of nonbiological bypass graft(s) of other extremity with ulceration                          |
|  | 17066  | Atherosclerosis of nonbiological bypass graft(s) of the extremities with gangrene                            |
|  | 170661 | Atherosclerosis of nonbiological bypass graft(s) of the extremities with gangrene, right leg                 |
|  | 170662 | Atherosclerosis of nonbiological bypass graft(s) of the extremities with gangrene, left leg                  |
|  | 170663 | Atherosclerosis of nonbiological bypass graft(s) of the extremities with gangrene, bilateral legs            |
|  | 170668 | Atherosclerosis of nonbiological bypass graft(s) of the extremities with gangrene, other extremity           |
|  | 170669 | Atherosclerosis of nonbiological bypass graft(s) of the extremities with gangrene, unspecified extremity     |
|  | 17069  | Other atherosclerosis of nonbiological bypass graft(s) of the extremities                                    |
|  | 170691 | Other atherosclerosis of nonbiological bypass graft(s) of the extremities, right leg                         |

|  |        |                                                                                                                           |
|--|--------|---------------------------------------------------------------------------------------------------------------------------|
|  | 170692 | Other atherosclerosis of nonbiological bypass graft(s) of the extremities, left leg                                       |
|  | 170693 | Other atherosclerosis of nonbiological bypass graft(s) of the extremities, bilateral legs                                 |
|  | 170698 | Other atherosclerosis of nonbiological bypass graft(s) of the extremities, other extremity                                |
|  | 170699 | Other atherosclerosis of nonbiological bypass graft(s) of the extremities, unspecified extremity                          |
|  | 1707   | Atherosclerosis of other type of bypass graft(s) of the extremities                                                       |
|  | 17070  | Unspecified atherosclerosis of other type of bypass graft(s) of the extremities                                           |
|  | 170701 | Unspecified atherosclerosis of other type of bypass graft(s) of the extremities, right leg                                |
|  | 170702 | Unspecified atherosclerosis of other type of bypass graft(s) of the extremities, left leg                                 |
|  | 170703 | Unspecified atherosclerosis of other type of bypass graft(s) of the extremities, bilateral legs                           |
|  | 170708 | Unspecified atherosclerosis of other type of bypass graft(s) of the extremities, other extremity                          |
|  | 170709 | Unspecified atherosclerosis of other type of bypass graft(s) of the extremities, unspecified extremity                    |
|  | 17071  | Atherosclerosis of other type of bypass graft(s) of the extremities with intermittent claudication                        |
|  | 170711 | Atherosclerosis of other type of bypass graft(s) of the extremities with intermittent claudication, right leg             |
|  | 170712 | Atherosclerosis of other type of bypass graft(s) of the extremities with intermittent claudication, left leg              |
|  | 170713 | Atherosclerosis of other type of bypass graft(s) of the extremities with intermittent claudication, bilateral legs        |
|  | 170718 | Atherosclerosis of other type of bypass graft(s) of the extremities with intermittent claudication, other extremity       |
|  | 170719 | Atherosclerosis of other type of bypass graft(s) of the extremities with intermittent claudication, unspecified extremity |
|  | 17072  | Atherosclerosis of other type of bypass graft(s) of the extremities with rest pain                                        |
|  | 170721 | Atherosclerosis of other type of bypass graft(s) of the extremities with rest pain, right leg                             |
|  | 170722 | Atherosclerosis of other type of bypass graft(s) of the extremities with rest pain, left leg                              |
|  | 170723 | Atherosclerosis of other type of bypass graft(s) of the extremities with rest pain, bilateral legs                        |
|  | 170728 | Atherosclerosis of other type of bypass graft(s) of the extremities with rest pain, other extremity                       |

|  |        |                                                                                                              |
|--|--------|--------------------------------------------------------------------------------------------------------------|
|  | 170729 | Atherosclerosis of other type of bypass graft(s) of the extremities with rest pain, unspecified extremity    |
|  | 17073  | Atherosclerosis of other type of bypass graft(s) of the right leg with ulceration                            |
|  | 170731 | Atherosclerosis of other type of bypass graft(s) of the right leg with ulceration of thigh                   |
|  | 170732 | Atherosclerosis of other type of bypass graft(s) of the right leg with ulceration of calf                    |
|  | 170733 | Atherosclerosis of other type of bypass graft(s) of the right leg with ulceration of ankle                   |
|  | 170734 | Atherosclerosis of other type of bypass graft(s) of the right leg with ulceration of heel and midfoot        |
|  | 170735 | Atherosclerosis of other type of bypass graft(s) of the right leg with ulceration of other part of foot      |
|  | 170738 | Atherosclerosis of other type of bypass graft(s) of the right leg with ulceration of other part of lower leg |
|  | 170739 | Atherosclerosis of other type of bypass graft(s) of the right leg with ulceration of unspecified site        |
|  | 17074  | Atherosclerosis of other type of bypass graft(s) of the left leg with ulceration                             |
|  | 170741 | Atherosclerosis of other type of bypass graft(s) of the left leg with ulceration of thigh                    |
|  | 170742 | Atherosclerosis of other type of bypass graft(s) of the left leg with ulceration of calf                     |
|  | 170743 | Atherosclerosis of other type of bypass graft(s) of the left leg with ulceration of ankle                    |
|  | 170744 | Atherosclerosis of other type of bypass graft(s) of the left leg with ulceration of heel and midfoot         |
|  | 170745 | Atherosclerosis of other type of bypass graft(s) of the left leg with ulceration of other part of foot       |
|  | 170748 | Atherosclerosis of other type of bypass graft(s) of the left leg with ulceration of other part of lower leg  |
|  | 170749 | Atherosclerosis of other type of bypass graft(s) of the left leg with ulceration of unspecified site         |
|  | 17075  | Atherosclerosis of other type of bypass graft(s) of other extremity with ulceration                          |
|  | 17076  | Atherosclerosis of other type of bypass graft(s) of the extremities with gangrene                            |
|  | 170761 | Atherosclerosis of other type of bypass graft(s) of the extremities with gangrene, right leg                 |
|  | 170762 | Atherosclerosis of other type of bypass graft(s) of the extremities with gangrene, left leg                  |

|                         |        |                                                                                                          |
|-------------------------|--------|----------------------------------------------------------------------------------------------------------|
|                         | 170763 | Atherosclerosis of other type of bypass graft(s) of the extremities with gangrene, bilateral legs        |
|                         | 170768 | Atherosclerosis of other type of bypass graft(s) of the extremities with gangrene, other extremity       |
|                         | 170769 | Atherosclerosis of other type of bypass graft(s) of the extremities with gangrene, unspecified extremity |
|                         | 17079  | Other atherosclerosis of other type of bypass graft(s) of the extremities                                |
|                         | 170791 | Other atherosclerosis of other type of bypass graft(s) of the extremities, right leg                     |
|                         | 170792 | Other atherosclerosis of other type of bypass graft(s) of the extremities, left leg                      |
|                         | 170793 | Other atherosclerosis of other type of bypass graft(s) of the extremities, bilateral legs                |
|                         | 170798 | Other atherosclerosis of other type of bypass graft(s) of the extremities, other extremity               |
|                         | 170799 | Other atherosclerosis of other type of bypass graft(s) of the extremities, unspecified extremity         |
|                         | 1708   | Atherosclerosis of other arteries                                                                        |
|                         | 1709   | Other and unspecified atherosclerosis                                                                    |
|                         | 17090  | Unspecified atherosclerosis                                                                              |
|                         | 17091  | Generalized atherosclerosis                                                                              |
|                         | 17092  | Chronic total occlusion of artery of the extremities                                                     |
|                         | 173    | Other peripheral vascular diseases                                                                       |
|                         | 1730   | Raynaud's syndrome                                                                                       |
|                         | 17300  | Raynaud's syndrome without gangrene                                                                      |
|                         | 17301  | Raynaud's syndrome with gangrene                                                                         |
|                         | 1731   | Thromboangiitis obliterans [Buerger's disease]                                                           |
|                         | 1738   | Other specified peripheral vascular diseases                                                             |
|                         | 17381  | Erythromelalgia                                                                                          |
|                         | 17389  | Other specified peripheral vascular diseases                                                             |
|                         | 1739   | Peripheral vascular disease, unspecified                                                                 |
|                         | 1791   | Aortitis in diseases classified elsewhere                                                                |
|                         | 1798   | Other disorders of arteries, arterioles and capillaries in diseases classified elsewhere                 |
| Rheumatic Heart Disease | I01    | Rheumatic fever with heart involvement                                                                   |
|                         | I010   | Acute rheumatic pericarditis                                                                             |
|                         | I011   | Acute rheumatic endocarditis                                                                             |
|                         | I012   | Acute rheumatic myocarditis                                                                              |
|                         | I018   | Other acute rheumatic heart disease                                                                      |
|                         | I019   | Acute rheumatic heart disease, unspecified                                                               |
|                         | I020   | Rheumatic chorea with heart involvement                                                                  |
|                         | I05    | Rheumatic mitral valve diseases                                                                          |

|                         |       |                                                                     |
|-------------------------|-------|---------------------------------------------------------------------|
|                         | I050  | Rheumatic mitral stenosis                                           |
|                         | I051  | Rheumatic mitral insufficiency                                      |
|                         | I052  | Rheumatic mitral stenosis with insufficiency                        |
|                         | I058  | Other rheumatic mitral valve diseases                               |
|                         | I059  | Rheumatic mitral valve disease, unspecified                         |
|                         | I06   | Rheumatic aortic valve diseases                                     |
|                         | I060  | Rheumatic aortic stenosis                                           |
|                         | I061  | Rheumatic aortic insufficiency                                      |
|                         | I062  | Rheumatic aortic stenosis with insufficiency                        |
|                         | I068  | Other rheumatic aortic valve diseases                               |
|                         | I069  | Rheumatic aortic valve disease, unspecified                         |
|                         | I07   | Rheumatic tricuspid valve diseases                                  |
|                         | I070  | Rheumatic tricuspid stenosis                                        |
|                         | I071  | Rheumatic tricuspid insufficiency                                   |
|                         | I072  | Rheumatic tricuspid stenosis and insufficiency                      |
|                         | I078  | Other rheumatic tricuspid valve diseases                            |
|                         | I079  | Rheumatic tricuspid valve disease, unspecified                      |
|                         | I08   | Multiple valve diseases                                             |
|                         | I080  | Rheumatic disorders of both mitral and aortic valves                |
|                         | I081  | Rheumatic disorders of both mitral and tricuspid valves             |
|                         | I082  | Rheumatic disorders of both aortic and tricuspid valves             |
|                         | I083  | Combined rheumatic disorders of mitral, aortic and tricuspid valves |
|                         | I088  | Other rheumatic multiple valve diseases                             |
|                         | I089  | Rheumatic multiple valve disease, unspecified                       |
|                         | I09   | Other rheumatic heart diseases                                      |
|                         | I090  | Rheumatic myocarditis                                               |
|                         | I091  | Rheumatic diseases of endocardium, valve unspecified                |
|                         | I092  | Chronic rheumatic pericarditis                                      |
|                         | I098  | Other specified rheumatic heart diseases                            |
|                         | I0981 | Rheumatic heart failure                                             |
|                         | I0989 | Other specified rheumatic heart diseases                            |
|                         | I099  | Rheumatic heart disease, unspecified                                |
| Cerebrovascular Disease | G45   | Transient cerebral ischemic attacks and related syndromes           |
|                         | G450  | Vertebro-basilar artery syndrome                                    |
|                         | G451  | Carotid artery syndrome (hemispheric)                               |
|                         | G452  | Multiple and bilateral precerebral artery syndromes                 |
|                         | G454  | Transient global amnesia                                            |
|                         | G458  | Other transient cerebral ischemic attacks and related syndromes     |
|                         | G459  | Transient cerebral ischemic attack, unspecified                     |
|                         | G46   | Vascular syndromes of brain in cerebrovascular diseases             |
|                         | G460  | Middle cerebral artery syndrome                                     |
|                         | G461  | Anterior cerebral artery syndrome                                   |

|  |       |                                                                                      |
|--|-------|--------------------------------------------------------------------------------------|
|  | G462  | Posterior cerebral artery syndrome                                                   |
|  | G463  | Brain stem stroke syndrome                                                           |
|  | G464  | Cerebellar stroke syndrome                                                           |
|  | G465  | Pure motor lacunar syndrome                                                          |
|  | G466  | Pure sensory lacunar syndrome                                                        |
|  | G467  | Other lacunar syndromes                                                              |
|  | G468  | Other vascular syndromes of brain in cerebrovascular diseases                        |
|  | I60   | Nontraumatic subarachnoid hemorrhage                                                 |
|  | I600  | Nontraumatic subarachnoid hemorrhage from carotid siphon and bifurcation             |
|  | I6000 | Nontraumatic subarachnoid hemorrhage from unspecified carotid siphon and bifurcation |
|  | I6001 | Nontraumatic subarachnoid hemorrhage from right carotid siphon and bifurcation       |
|  | I6002 | Nontraumatic subarachnoid hemorrhage from left carotid siphon and bifurcation        |
|  | I601  | Nontraumatic subarachnoid hemorrhage from middle cerebral artery                     |
|  | I6010 | Nontraumatic subarachnoid hemorrhage from unspecified middle cerebral artery         |
|  | I6011 | Nontraumatic subarachnoid hemorrhage from right middle cerebral artery               |
|  | I6012 | Nontraumatic subarachnoid hemorrhage from left middle cerebral artery                |
|  | I602  | Nontraumatic subarachnoid hemorrhage from anterior communicating artery              |
|  | I6020 | Nontraumatic subarachnoid hemorrhage from unspecified anterior communicating artery  |
|  | I6021 | Nontraumatic subarachnoid hemorrhage from right anterior communicating artery        |
|  | I6022 | Nontraumatic subarachnoid hemorrhage from left anterior communicating artery         |
|  | I603  | Nontraumatic subarachnoid hemorrhage from posterior communicating artery             |
|  | I6030 | Nontraumatic subarachnoid hemorrhage from unspecified posterior communicating artery |
|  | I6031 | Nontraumatic subarachnoid hemorrhage from right posterior communicating artery       |
|  | I6032 | Nontraumatic subarachnoid hemorrhage from left posterior communicating artery        |
|  | I604  | Nontraumatic subarachnoid hemorrhage from basilar artery                             |
|  | I605  | Nontraumatic subarachnoid hemorrhage from vertebral artery                           |

|  |        |                                                                           |
|--|--------|---------------------------------------------------------------------------|
|  | I6050  | Nontraumatic subarachnoid hemorrhage from unspecified vertebral artery    |
|  | I6051  | Nontraumatic subarachnoid hemorrhage from right vertebral artery          |
|  | I6052  | Nontraumatic subarachnoid hemorrhage from left vertebral artery           |
|  | I606   | Nontraumatic subarachnoid hemorrhage from other intracranial arteries     |
|  | I607   | Nontraumatic subarachnoid hemorrhage from unspecified intracranial artery |
|  | I608   | Other nontraumatic subarachnoid hemorrhage                                |
|  | I609   | Nontraumatic subarachnoid hemorrhage, unspecified                         |
|  | I61    | Nontraumatic intracerebral hemorrhage                                     |
|  | I610   | Nontraumatic intracerebral hemorrhage in hemisphere, subcortical          |
|  | I611   | Nontraumatic intracerebral hemorrhage in hemisphere, cortical             |
|  | I612   | Nontraumatic intracerebral hemorrhage in hemisphere, unspecified          |
|  | I613   | Nontraumatic intracerebral hemorrhage in brain stem                       |
|  | I614   | Nontraumatic intracerebral hemorrhage in cerebellum                       |
|  | I615   | Nontraumatic intracerebral hemorrhage, intraventricular                   |
|  | I616   | Nontraumatic intracerebral hemorrhage, multiple localized                 |
|  | I618   | Other nontraumatic intracerebral hemorrhage                               |
|  | I619   | Nontraumatic intracerebral hemorrhage, unspecified                        |
|  | I62    | Other and unspecified nontraumatic intracranial hemorrhage                |
|  | I621   | Nontraumatic extradural hemorrhage                                        |
|  | I629   | Nontraumatic intracranial hemorrhage, unspecified                         |
|  | I63    | Cerebral infarction                                                       |
|  | I630   | Cerebral infarction due to thrombosis of precerebral arteries             |
|  | I6300  | Cerebral infarction due to thrombosis of unspecified precerebral artery   |
|  | I6301  | Cerebral infarction due to thrombosis of vertebral artery                 |
|  | I63011 | Cerebral infarction due to thrombosis of right vertebral artery           |
|  | I63012 | Cerebral infarction due to thrombosis of left vertebral artery            |
|  | I63019 | Cerebral infarction due to thrombosis of unspecified vertebral artery     |
|  | I6302  | Cerebral infarction due to thrombosis of basilar artery                   |
|  | I6303  | Cerebral infarction due to thrombosis of carotid artery                   |
|  | I63031 | Cerebral infarction due to thrombosis of right carotid artery             |
|  | I63032 | Cerebral infarction due to thrombosis of left carotid artery              |
|  | I63039 | Cerebral infarction due to thrombosis of unspecified carotid artery       |
|  | I6309  | Cerebral infarction due to thrombosis of other precerebral artery         |



|  |        |                                                                                                  |
|--|--------|--------------------------------------------------------------------------------------------------|
|  | I631   | Cerebral infarction due to embolism of precerebral arteries                                      |
|  | I6310  | Cerebral infarction due to embolism of unspecified precerebral artery                            |
|  | I6311  | Cerebral infarction due to embolism of vertebral artery                                          |
|  | I63111 | Cerebral infarction due to embolism of right vertebral artery                                    |
|  | I63112 | Cerebral infarction due to embolism of left vertebral artery                                     |
|  | I63119 | Cerebral infarction due to embolism of unspecified vertebral artery                              |
|  | I6312  | Cerebral infarction due to embolism of basilar artery                                            |
|  | I6313  | Cerebral infarction due to embolism of carotid artery                                            |
|  | I63131 | Cerebral infarction due to embolism of right carotid artery                                      |
|  | I63132 | Cerebral infarction due to embolism of left carotid artery                                       |
|  | I63139 | Cerebral infarction due to embolism of unspecified carotid artery                                |
|  | I6319  | Cerebral infarction due to embolism of other precerebral artery                                  |
|  | I632   | Cerebral infarction due to unspecified occlusion or stenosis of precerebral arteries             |
|  | I6320  | Cerebral infarction due to unspecified occlusion or stenosis of unspecified precerebral arteries |
|  | I6321  | Cerebral infarction due to unspecified occlusion or stenosis of vertebral arteries               |
|  | I63211 | Cerebral infarction due to unspecified occlusion or stenosis of right vertebral arteries         |
|  | I63212 | Cerebral infarction due to unspecified occlusion or stenosis of left vertebral arteries          |
|  | I63219 | Cerebral infarction due to unspecified occlusion or stenosis of unspecified vertebral arteries   |
|  | I6322  | Cerebral infarction due to unspecified occlusion or stenosis of basilar arteries                 |
|  | I6323  | Cerebral infarction due to unspecified occlusion or stenosis of carotid arteries                 |
|  | I63231 | Cerebral infarction due to unspecified occlusion or stenosis of right carotid arteries           |
|  | I63232 | Cerebral infarction due to unspecified occlusion or stenosis of left carotid arteries            |
|  | I63239 | Cerebral infarction due to unspecified occlusion or stenosis of unspecified carotid arteries     |
|  | I6329  | Cerebral infarction due to unspecified occlusion or stenosis of other precerebral arteries       |
|  | I633   | Cerebral infarction due to thrombosis of cerebral arteries                                       |
|  | I6330  | Cerebral infarction due to thrombosis of unspecified cerebral artery                             |
|  | I6331  | Cerebral infarction due to thrombosis of middle cerebral artery                                  |

|  |        |                                                                                |
|--|--------|--------------------------------------------------------------------------------|
|  | I63311 | Cerebral infarction due to thrombosis of right middle cerebral artery          |
|  | I63312 | Cerebral infarction due to thrombosis of left middle cerebral artery           |
|  | I63319 | Cerebral infarction due to thrombosis of unspecified middle cerebral artery    |
|  | I6332  | Cerebral infarction due to thrombosis of anterior cerebral artery              |
|  | I63321 | Cerebral infarction due to thrombosis of right anterior cerebral artery        |
|  | I63322 | Cerebral infarction due to thrombosis of left anterior cerebral artery         |
|  | I63329 | Cerebral infarction due to thrombosis of unspecified anterior cerebral artery  |
|  | I6333  | Cerebral infarction due to thrombosis of posterior cerebral artery             |
|  | I63331 | Cerebral infarction due to thrombosis of right posterior cerebral artery       |
|  | I63332 | Cerebral infarction due to thrombosis of left posterior cerebral artery        |
|  | I63339 | Cerebral infarction due to thrombosis of unspecified posterior cerebral artery |
|  | I6334  | Cerebral infarction due to thrombosis of cerebellar artery                     |
|  | I63341 | Cerebral infarction due to thrombosis of right cerebellar artery               |
|  | I63342 | Cerebral infarction due to thrombosis of left cerebellar artery                |
|  | I63349 | Cerebral infarction due to thrombosis of unspecified cerebellar artery         |
|  | I6339  | Cerebral infarction due to thrombosis of other cerebral artery                 |
|  | I634   | Cerebral infarction due to embolism of cerebral arteries                       |
|  | I6340  | Cerebral infarction due to embolism of unspecified cerebral artery             |
|  | I6341  | Cerebral infarction due to embolism of middle cerebral artery                  |
|  | I63411 | Cerebral infarction due to embolism of right middle cerebral artery            |
|  | I63412 | Cerebral infarction due to embolism of left middle cerebral artery             |
|  | I63419 | Cerebral infarction due to embolism of unspecified middle cerebral artery      |
|  | I6342  | Cerebral infarction due to embolism of anterior cerebral artery                |
|  | I63421 | Cerebral infarction due to embolism of right anterior cerebral artery          |
|  | I63422 | Cerebral infarction due to embolism of left anterior cerebral artery           |
|  | I63429 | Cerebral infarction due to embolism of unspecified anterior cerebral artery    |
|  | I6343  | Cerebral infarction due to embolism of posterior cerebral artery               |

|  |        |                                                                                                       |
|--|--------|-------------------------------------------------------------------------------------------------------|
|  | I63431 | Cerebral infarction due to embolism of right posterior cerebral artery                                |
|  | I63432 | Cerebral infarction due to embolism of left posterior cerebral artery                                 |
|  | I63439 | Cerebral infarction due to embolism of unspecified posterior cerebral artery                          |
|  | I6344  | Cerebral infarction due to embolism of cerebellar artery                                              |
|  | I63441 | Cerebral infarction due to embolism of right cerebellar artery                                        |
|  | I63442 | Cerebral infarction due to embolism of left cerebellar artery                                         |
|  | I63449 | Cerebral infarction due to embolism of unspecified cerebellar artery                                  |
|  | I6349  | Cerebral infarction due to embolism of other cerebral artery                                          |
|  | I635   | Cerebral infarction due to unspecified occlusion or stenosis of cerebral arteries                     |
|  | I6350  | Cerebral infarction due to unspecified occlusion or stenosis of unspecified cerebral artery           |
|  | I6351  | Cerebral infarction due to unspecified occlusion or stenosis of middle cerebral artery                |
|  | I63511 | Cerebral infarction due to unspecified occlusion or stenosis of right middle cerebral artery          |
|  | I63512 | Cerebral infarction due to unspecified occlusion or stenosis of left middle cerebral artery           |
|  | I63519 | Cerebral infarction due to unspecified occlusion or stenosis of unspecified middle cerebral artery    |
|  | I6352  | Cerebral infarction due to unspecified occlusion or stenosis of anterior cerebral artery              |
|  | I63521 | Cerebral infarction due to unspecified occlusion or stenosis of right anterior cerebral artery        |
|  | I63522 | Cerebral infarction due to unspecified occlusion or stenosis of left anterior cerebral artery         |
|  | I63529 | Cerebral infarction due to unspecified occlusion or stenosis of unspecified anterior cerebral artery  |
|  | I6353  | Cerebral infarction due to unspecified occlusion or stenosis of posterior cerebral artery             |
|  | I63531 | Cerebral infarction due to unspecified occlusion or stenosis of right posterior cerebral artery       |
|  | I63532 | Cerebral infarction due to unspecified occlusion or stenosis of left posterior cerebral artery        |
|  | I63539 | Cerebral infarction due to unspecified occlusion or stenosis of unspecified posterior cerebral artery |
|  | I6354  | Cerebral infarction due to unspecified occlusion or stenosis of cerebellar artery                     |
|  | I63541 | Cerebral infarction due to unspecified occlusion or stenosis of right cerebellar artery               |

|  |        |                                                                                               |
|--|--------|-----------------------------------------------------------------------------------------------|
|  | I63542 | Cerebral infarction due to unspecified occlusion or stenosis of left cerebellar artery        |
|  | I63549 | Cerebral infarction due to unspecified occlusion or stenosis of unspecified cerebellar artery |
|  | I6359  | Cerebral infarction due to unspecified occlusion or stenosis of other cerebral artery         |
|  | I636   | Cerebral infarction due to cerebral venous thrombosis, nonpyogenic                            |
|  | I637   |                                                                                               |
|  | I638   | Other cerebral infarction                                                                     |
|  | I639   | Cerebral infarction, unspecified                                                              |
|  | I64    | Stroke, not specified as haemorrhage or infarction                                            |
|  | I641   | Stroke, not specified as haemorrhage or infarction                                            |
|  | I65    | Occlusion and stenosis of precerebral arteries, not resulting in cerebral infarction          |
|  | I650   | Occlusion and stenosis of vertebral artery                                                    |
|  | I6501  | Occlusion and stenosis of right vertebral artery                                              |
|  | I6502  | Occlusion and stenosis of left vertebral artery                                               |
|  | I6503  | Occlusion and stenosis of bilateral vertebral arteries                                        |
|  | I6509  | Occlusion and stenosis of unspecified vertebral artery                                        |
|  | I651   | Occlusion and stenosis of basilar artery                                                      |
|  | I652   | Occlusion and stenosis of carotid artery                                                      |
|  | I6521  | Occlusion and stenosis of right carotid artery                                                |
|  | I6522  | Occlusion and stenosis of left carotid artery                                                 |
|  | I6523  | Occlusion and stenosis of bilateral carotid arteries                                          |
|  | I6529  | Occlusion and stenosis of unspecified carotid artery                                          |
|  | I653   | Occlusion and stenosis of multiple and bilateral precerebral arteries                         |
|  | I658   | Occlusion and stenosis of other precerebral arteries                                          |
|  | I659   | Occlusion and stenosis of unspecified precerebral artery                                      |
|  | I66    | Occlusion and stenosis of cerebral arteries, not resulting in cerebral infarction             |
|  | I660   | Occlusion and stenosis of middle cerebral artery                                              |
|  | I6601  | Occlusion and stenosis of right middle cerebral artery                                        |
|  | I6602  | Occlusion and stenosis of left middle cerebral artery                                         |
|  | I6603  | Occlusion and stenosis of bilateral middle cerebral arteries                                  |
|  | I6609  | Occlusion and stenosis of unspecified middle cerebral artery                                  |
|  | I661   | Occlusion and stenosis of anterior cerebral artery                                            |
|  | I6611  | Occlusion and stenosis of right anterior cerebral artery                                      |
|  | I6612  | Occlusion and stenosis of left anterior cerebral artery                                       |
|  | I6613  | Occlusion and stenosis of bilateral anterior cerebral arteries                                |
|  | I6619  | Occlusion and stenosis of unspecified anterior cerebral artery                                |
|  | I662   | Occlusion and stenosis of posterior cerebral artery                                           |

|  |        |                                                                             |
|--|--------|-----------------------------------------------------------------------------|
|  | I6621  | Occlusion and stenosis of right posterior cerebral artery                   |
|  | I6622  | Occlusion and stenosis of left posterior cerebral artery                    |
|  | I6623  | Occlusion and stenosis of bilateral posterior cerebral arteries             |
|  | I6629  | Occlusion and stenosis of unspecified posterior cerebral artery             |
|  | I663   | Occlusion and stenosis of cerebellar arteries                               |
|  | I664   | Occlusion and stenosis of multiple and bilateral cerebral arteries          |
|  | I668   | Occlusion and stenosis of other cerebral arteries                           |
|  | I669   | Occlusion and stenosis of unspecified cerebral artery                       |
|  | I67    | Other cerebrovascular diseases                                              |
|  | I671   | Cerebral aneurysm, nonruptured                                              |
|  | I672   | Cerebral atherosclerosis                                                    |
|  | I674   | Hypertensive encephalopathy                                                 |
|  | I675   | Moyamoya disease                                                            |
|  | I676   | Nonpyogenic thrombosis of intracranial venous system                        |
|  | I677   | Cerebral arteritis, not elsewhere classified                                |
|  | I678   | Other specified cerebrovascular diseases                                    |
|  | I6781  | Acute cerebrovascular insufficiency                                         |
|  | I6782  | Cerebral ischemia                                                           |
|  | I6783  | Posterior reversible encephalopathy syndrome                                |
|  | I6784  | Cerebral vasospasm and vasoconstriction                                     |
|  | I67841 | Reversible cerebrovascular vasoconstriction syndrome                        |
|  | I67848 | Other cerebrovascular vasospasm and vasoconstriction                        |
|  | I6789  | Other cerebrovascular disease                                               |
|  | I679   | Cerebrovascular disease, unspecified                                        |
|  | I68    | Cerebrovascular disorders in diseases classified elsewhere                  |
|  | I680   | Cerebral amyloid angiopathy                                                 |
|  | I681   | Other cerebrovascular disorders in diseases classified elsewhere            |
|  | I682   | Cerebral arteritis in other diseases classified elsewhere                   |
|  | I688   | Other cerebrovascular disorders in diseases classified elsewhere            |
|  | I69    | Sequelae of cerebrovascular disease                                         |
|  | I690   | Sequelae of nontraumatic subarachnoid hemorrhage                            |
|  | I6900  | Unspecified sequelae of nontraumatic subarachnoid hemorrhage                |
|  | I6901  | Cognitive deficits following nontraumatic subarachnoid hemorrhage           |
|  | I6902  | Speech and language deficits following nontraumatic subarachnoid hemorrhage |
|  | I69020 | Aphasia following nontraumatic subarachnoid hemorrhage                      |
|  | I69021 | Dysphasia following nontraumatic subarachnoid hemorrhage                    |
|  | I69022 | Dysarthria following nontraumatic subarachnoid hemorrhage                   |
|  | I69023 | Fluency disorder following nontraumatic subarachnoid hemorrhage             |

|  |        |                                                                                                             |
|--|--------|-------------------------------------------------------------------------------------------------------------|
|  | 169028 | Other speech and language deficits following nontraumatic subarachnoid hemorrhage                           |
|  | 16903  | Monoplegia of upper limb following nontraumatic subarachnoid hemorrhage                                     |
|  | 169031 | Monoplegia of upper limb following nontraumatic subarachnoid hemorrhage affecting right dominant side       |
|  | 169032 | Monoplegia of upper limb following nontraumatic subarachnoid hemorrhage affecting left dominant side        |
|  | 169033 | Monoplegia of upper limb following nontraumatic subarachnoid hemorrhage affecting right non-dominant side   |
|  | 169034 | Monoplegia of upper limb following nontraumatic subarachnoid hemorrhage affecting left non-dominant side    |
|  | 169039 | Monoplegia of upper limb following nontraumatic subarachnoid hemorrhage affecting unspecified side          |
|  | 16904  | Monoplegia of lower limb following nontraumatic subarachnoid hemorrhage                                     |
|  | 169041 | Monoplegia of lower limb following nontraumatic subarachnoid hemorrhage affecting right dominant side       |
|  | 169042 | Monoplegia of lower limb following nontraumatic subarachnoid hemorrhage affecting left dominant side        |
|  | 169043 | Monoplegia of lower limb following nontraumatic subarachnoid hemorrhage affecting right non-dominant side   |
|  | 169044 | Monoplegia of lower limb following nontraumatic subarachnoid hemorrhage affecting left non-dominant side    |
|  | 169049 | Monoplegia of lower limb following nontraumatic subarachnoid hemorrhage affecting unspecified side          |
|  | 16905  | Hemiplegia and hemiparesis following nontraumatic subarachnoid hemorrhage                                   |
|  | 169051 | Hemiplegia and hemiparesis following nontraumatic subarachnoid hemorrhage affecting right dominant side     |
|  | 169052 | Hemiplegia and hemiparesis following nontraumatic subarachnoid hemorrhage affecting left dominant side      |
|  | 169053 | Hemiplegia and hemiparesis following nontraumatic subarachnoid hemorrhage affecting right non-dominant side |
|  | 169054 | Hemiplegia and hemiparesis following nontraumatic subarachnoid hemorrhage affecting left non-dominant side  |
|  | 169059 | Hemiplegia and hemiparesis following nontraumatic subarachnoid hemorrhage affecting unspecified side        |
|  | 16906  | Other paralytic syndrome following nontraumatic subarachnoid hemorrhage                                     |
|  | 169061 | Other paralytic syndrome following nontraumatic subarachnoid hemorrhage affecting right dominant side       |

|  |        |                                                                                                            |
|--|--------|------------------------------------------------------------------------------------------------------------|
|  | 169062 | Other paralytic syndrome following nontraumatic subarachnoid hemorrhage affecting left dominant side       |
|  | 169063 | Other paralytic syndrome following nontraumatic subarachnoid hemorrhage affecting right non-dominant side  |
|  | 169064 | Other paralytic syndrome following nontraumatic subarachnoid hemorrhage affecting left non-dominant side   |
|  | 169065 | Other paralytic syndrome following nontraumatic subarachnoid hemorrhage, bilateral                         |
|  | 169069 | Other paralytic syndrome following nontraumatic subarachnoid hemorrhage affecting unspecified side         |
|  | 16909  | Other sequelae of nontraumatic subarachnoid hemorrhage                                                     |
|  | 169090 | Apraxia following nontraumatic subarachnoid hemorrhage                                                     |
|  | 169091 | Dysphagia following nontraumatic subarachnoid hemorrhage                                                   |
|  | 169092 | Facial weakness following nontraumatic subarachnoid hemorrhage                                             |
|  | 169093 | Ataxia following nontraumatic subarachnoid hemorrhage                                                      |
|  | 169098 | Other sequelae following nontraumatic subarachnoid hemorrhage                                              |
|  | 1691   | Sequelae of nontraumatic intracerebral hemorrhage                                                          |
|  | 16910  | Unspecified sequelae of nontraumatic intracerebral hemorrhage                                              |
|  | 16911  | Cognitive deficits following nontraumatic intracerebral hemorrhage                                         |
|  | 16912  | Speech and language deficits following nontraumatic intracerebral hemorrhage                               |
|  | 169120 | Aphasia following nontraumatic intracerebral hemorrhage                                                    |
|  | 169121 | Dysphasia following nontraumatic intracerebral hemorrhage                                                  |
|  | 169122 | Dysarthria following nontraumatic intracerebral hemorrhage                                                 |
|  | 169123 | Fluency disorder following nontraumatic intracerebral hemorrhage                                           |
|  | 169128 | Other speech and language deficits following nontraumatic intracerebral hemorrhage                         |
|  | 16913  | Monoplegia of upper limb following nontraumatic intracerebral hemorrhage                                   |
|  | 169131 | Monoplegia of upper limb following nontraumatic intracerebral hemorrhage affecting right dominant side     |
|  | 169132 | Monoplegia of upper limb following nontraumatic intracerebral hemorrhage affecting left dominant side      |
|  | 169133 | Monoplegia of upper limb following nontraumatic intracerebral hemorrhage affecting right non-dominant side |
|  | 169134 | Monoplegia of upper limb following nontraumatic intracerebral hemorrhage affecting left non-dominant side  |
|  | 169139 | Monoplegia of upper limb following nontraumatic intracerebral hemorrhage affecting unspecified side        |

|  |        |                                                                                                              |
|--|--------|--------------------------------------------------------------------------------------------------------------|
|  | I6914  | Monoplegia of lower limb following nontraumatic intracerebral hemorrhage                                     |
|  | I69141 | Monoplegia of lower limb following nontraumatic intracerebral hemorrhage affecting right dominant side       |
|  | I69142 | Monoplegia of lower limb following nontraumatic intracerebral hemorrhage affecting left dominant side        |
|  | I69143 | Monoplegia of lower limb following nontraumatic intracerebral hemorrhage affecting right non-dominant side   |
|  | I69144 | Monoplegia of lower limb following nontraumatic intracerebral hemorrhage affecting left non-dominant side    |
|  | I69149 | Monoplegia of lower limb following nontraumatic intracerebral hemorrhage affecting unspecified side          |
|  | I6915  | Hemiplegia and hemiparesis following nontraumatic intracerebral hemorrhage                                   |
|  | I69151 | Hemiplegia and hemiparesis following nontraumatic intracerebral hemorrhage affecting right dominant side     |
|  | I69152 | Hemiplegia and hemiparesis following nontraumatic intracerebral hemorrhage affecting left dominant side      |
|  | I69153 | Hemiplegia and hemiparesis following nontraumatic intracerebral hemorrhage affecting right non-dominant side |
|  | I69154 | Hemiplegia and hemiparesis following nontraumatic intracerebral hemorrhage affecting left non-dominant side  |
|  | I69159 | Hemiplegia and hemiparesis following nontraumatic intracerebral hemorrhage affecting unspecified side        |
|  | I6916  | Other paralytic syndrome following nontraumatic intracerebral hemorrhage                                     |
|  | I69161 | Other paralytic syndrome following nontraumatic intracerebral hemorrhage affecting right dominant side       |
|  | I69162 | Other paralytic syndrome following nontraumatic intracerebral hemorrhage affecting left dominant side        |
|  | I69163 | Other paralytic syndrome following nontraumatic intracerebral hemorrhage affecting right non-dominant side   |
|  | I69164 | Other paralytic syndrome following nontraumatic intracerebral hemorrhage affecting left non-dominant side    |
|  | I69165 | Other paralytic syndrome following nontraumatic intracerebral hemorrhage, bilateral                          |
|  | I69169 | Other paralytic syndrome following nontraumatic intracerebral hemorrhage affecting unspecified side          |
|  | I6919  | Other sequelae of nontraumatic intracerebral hemorrhage                                                      |
|  | I69190 | Apraxia following nontraumatic intracerebral hemorrhage                                                      |
|  | I69191 | Dysphagia following nontraumatic intracerebral hemorrhage                                                    |
|  | I69192 | Facial weakness following nontraumatic intracerebral hemorrhage                                              |



|  |        |                                                                                                                 |
|--|--------|-----------------------------------------------------------------------------------------------------------------|
|  | I69193 | Ataxia following nontraumatic intracerebral hemorrhage                                                          |
|  | I69198 | Other sequelae of nontraumatic intracerebral hemorrhage                                                         |
|  | I692   | Sequelae of other nontraumatic intracranial hemorrhage                                                          |
|  | I6920  | Unspecified sequelae of other nontraumatic intracranial hemorrhage                                              |
|  | I6921  | Cognitive deficits following other nontraumatic intracranial hemorrhage                                         |
|  | I6922  | Speech and language deficits following other nontraumatic intracranial hemorrhage                               |
|  | I69220 | Aphasia following other nontraumatic intracranial hemorrhage                                                    |
|  | I69221 | Dysphasia following other nontraumatic intracranial hemorrhage                                                  |
|  | I69222 | Dysarthria following other nontraumatic intracranial hemorrhage                                                 |
|  | I69223 | Fluency disorder following other nontraumatic intracranial hemorrhage                                           |
|  | I69228 | Other speech and language deficits following other nontraumatic intracranial hemorrhage                         |
|  | I6923  | Monoplegia of upper limb following other nontraumatic intracranial hemorrhage                                   |
|  | I69231 | Monoplegia of upper limb following other nontraumatic intracranial hemorrhage affecting right dominant side     |
|  | I69232 | Monoplegia of upper limb following other nontraumatic intracranial hemorrhage affecting left dominant side      |
|  | I69233 | Monoplegia of upper limb following other nontraumatic intracranial hemorrhage affecting right non-dominant side |
|  | I69234 | Monoplegia of upper limb following other nontraumatic intracranial hemorrhage affecting left non-dominant side  |
|  | I69239 | Monoplegia of upper limb following other nontraumatic intracranial hemorrhage affecting unspecified side        |
|  | I6924  | Monoplegia of lower limb following other nontraumatic intracranial hemorrhage                                   |
|  | I69241 | Monoplegia of lower limb following other nontraumatic intracranial hemorrhage affecting right dominant side     |
|  | I69242 | Monoplegia of lower limb following other nontraumatic intracranial hemorrhage affecting left dominant side      |
|  | I69243 | Monoplegia of lower limb following other nontraumatic intracranial hemorrhage affecting right non-dominant side |
|  | I69244 | Monoplegia of lower limb following other nontraumatic intracranial hemorrhage affecting left non-dominant side  |
|  | I69249 | Monoplegia of lower limb following other nontraumatic intracranial hemorrhage affecting unspecified side        |
|  | I6925  | Hemiplegia and hemiparesis following other nontraumatic intracranial hemorrhage                                 |

|  |        |                                                                                                                   |
|--|--------|-------------------------------------------------------------------------------------------------------------------|
|  | 169251 | Hemiplegia and hemiparesis following other nontraumatic intracranial hemorrhage affecting right dominant side     |
|  | 169252 | Hemiplegia and hemiparesis following other nontraumatic intracranial hemorrhage affecting left dominant side      |
|  | 169253 | Hemiplegia and hemiparesis following other nontraumatic intracranial hemorrhage affecting right non-dominant side |
|  | 169254 | Hemiplegia and hemiparesis following other nontraumatic intracranial hemorrhage affecting left non-dominant side  |
|  | 169259 | Hemiplegia and hemiparesis following other nontraumatic intracranial hemorrhage affecting unspecified side        |
|  | 16926  | Other paralytic syndrome following other nontraumatic intracranial hemorrhage                                     |
|  | 169261 | Other paralytic syndrome following other nontraumatic intracranial hemorrhage affecting right dominant side       |
|  | 169262 | Other paralytic syndrome following other nontraumatic intracranial hemorrhage affecting left dominant side        |
|  | 169263 | Other paralytic syndrome following other nontraumatic intracranial hemorrhage affecting right non-dominant side   |
|  | 169264 | Other paralytic syndrome following other nontraumatic intracranial hemorrhage affecting left non-dominant side    |
|  | 169265 | Other paralytic syndrome following other nontraumatic intracranial hemorrhage, bilateral                          |
|  | 169269 | Other paralytic syndrome following other nontraumatic intracranial hemorrhage affecting unspecified side          |
|  | 16929  | Other sequelae of other nontraumatic intracranial hemorrhage                                                      |
|  | 169290 | Apraxia following other nontraumatic intracranial hemorrhage                                                      |
|  | 169291 | Dysphagia following other nontraumatic intracranial hemorrhage                                                    |
|  | 169292 | Facial weakness following other nontraumatic intracranial hemorrhage                                              |
|  | 169293 | Ataxia following other nontraumatic intracranial hemorrhage                                                       |
|  | 169298 | Other sequelae of other nontraumatic intracranial hemorrhage                                                      |
|  | 1693   | Sequelae of cerebral infarction                                                                                   |
|  | 16930  | Unspecified sequelae of cerebral infarction                                                                       |
|  | 16931  | Cognitive deficits following cerebral infarction                                                                  |
|  | 16932  | Speech and language deficits following cerebral infarction                                                        |
|  | 169320 | Aphasia following cerebral infarction                                                                             |
|  | 169321 | Dysphasia following cerebral infarction                                                                           |
|  | 169322 | Dysarthria following cerebral infarction                                                                          |
|  | 169323 | Fluency disorder following cerebral infarction                                                                    |
|  | 169328 | Other speech and language deficits following cerebral infarction                                                  |
|  | 16933  | Monoplegia of upper limb following cerebral infarction                                                            |

|  |        |                                                                                            |
|--|--------|--------------------------------------------------------------------------------------------|
|  | I69331 | Monoplegia of upper limb following cerebral infarction affecting right dominant side       |
|  | I69332 | Monoplegia of upper limb following cerebral infarction affecting left dominant side        |
|  | I69333 | Monoplegia of upper limb following cerebral infarction affecting right non-dominant side   |
|  | I69334 | Monoplegia of upper limb following cerebral infarction affecting left non-dominant side    |
|  | I69339 | Monoplegia of upper limb following cerebral infarction affecting unspecified side          |
|  | I6934  | Monoplegia of lower limb following cerebral infarction                                     |
|  | I69341 | Monoplegia of lower limb following cerebral infarction affecting right dominant side       |
|  | I69342 | Monoplegia of lower limb following cerebral infarction affecting left dominant side        |
|  | I69343 | Monoplegia of lower limb following cerebral infarction affecting right non-dominant side   |
|  | I69344 | Monoplegia of lower limb following cerebral infarction affecting left non-dominant side    |
|  | I69349 | Monoplegia of lower limb following cerebral infarction affecting unspecified side          |
|  | I6935  | Hemiplegia and hemiparesis following cerebral infarction                                   |
|  | I69351 | Hemiplegia and hemiparesis following cerebral infarction affecting right dominant side     |
|  | I69352 | Hemiplegia and hemiparesis following cerebral infarction affecting left dominant side      |
|  | I69353 | Hemiplegia and hemiparesis following cerebral infarction affecting right non-dominant side |
|  | I69354 | Hemiplegia and hemiparesis following cerebral infarction affecting left non-dominant side  |
|  | I69359 | Hemiplegia and hemiparesis following cerebral infarction affecting unspecified side        |
|  | I6936  | Other paralytic syndrome following cerebral infarction                                     |
|  | I69361 | Other paralytic syndrome following cerebral infarction affecting right dominant side       |
|  | I69362 | Other paralytic syndrome following cerebral infarction affecting left dominant side        |
|  | I69363 | Other paralytic syndrome following cerebral infarction affecting right non-dominant side   |
|  | I69364 | Other paralytic syndrome following cerebral infarction affecting left non-dominant side    |
|  | I69365 | Other paralytic syndrome following cerebral infarction, bilateral                          |

|  |        |                                                                                                    |
|--|--------|----------------------------------------------------------------------------------------------------|
|  | 169369 | Other paralytic syndrome following cerebral infarction affecting unspecified side                  |
|  | 16939  | Other sequelae of cerebral infarction                                                              |
|  | 169390 | Apraxia following cerebral infarction                                                              |
|  | 169391 | Dysphagia following cerebral infarction                                                            |
|  | 169392 | Facial weakness following cerebral infarction                                                      |
|  | 169393 | Ataxia following cerebral infarction                                                               |
|  | 169398 | Other sequelae of cerebral infarction                                                              |
|  | 1694   | Sequelae of stroke, not specified as haemorrhage or infarction                                     |
|  | 1698   | Sequelae of other cerebrovascular diseases                                                         |
|  | 16980  | Unspecified sequelae of other cerebrovascular disease                                              |
|  | 16981  | Cognitive deficits following other cerebrovascular disease                                         |
|  | 16982  | Speech and language deficits following other cerebrovascular disease                               |
|  | 169820 | Aphasia following other cerebrovascular disease                                                    |
|  | 169821 | Dysphasia following other cerebrovascular disease                                                  |
|  | 169822 | Dysarthria following other cerebrovascular disease                                                 |
|  | 169823 | Fluency disorder following other cerebrovascular disease                                           |
|  | 169828 | Other speech and language deficits following other cerebrovascular disease                         |
|  | 16983  | Monoplegia of upper limb following other cerebrovascular disease                                   |
|  | 169831 | Monoplegia of upper limb following other cerebrovascular disease affecting right dominant side     |
|  | 169832 | Monoplegia of upper limb following other cerebrovascular disease affecting left dominant side      |
|  | 169833 | Monoplegia of upper limb following other cerebrovascular disease affecting right non-dominant side |
|  | 169834 | Monoplegia of upper limb following other cerebrovascular disease affecting left non-dominant side  |
|  | 169839 | Monoplegia of upper limb following other cerebrovascular disease affecting unspecified side        |
|  | 16984  | Monoplegia of lower limb following other cerebrovascular disease                                   |
|  | 169841 | Monoplegia of lower limb following other cerebrovascular disease affecting right dominant side     |
|  | 169842 | Monoplegia of lower limb following other cerebrovascular disease affecting left dominant side      |
|  | 169843 | Monoplegia of lower limb following other cerebrovascular disease affecting right non-dominant side |
|  | 169844 | Monoplegia of lower limb following other cerebrovascular disease affecting left non-dominant side  |

|  |        |                                                                                                      |
|--|--------|------------------------------------------------------------------------------------------------------|
|  | 169849 | Monoplegia of lower limb following other cerebrovascular disease affecting unspecified side          |
|  | 16985  | Hemiplegia and hemiparesis following other cerebrovascular disease                                   |
|  | 169851 | Hemiplegia and hemiparesis following other cerebrovascular disease affecting right dominant side     |
|  | 169852 | Hemiplegia and hemiparesis following other cerebrovascular disease affecting left dominant side      |
|  | 169853 | Hemiplegia and hemiparesis following other cerebrovascular disease affecting right non-dominant side |
|  | 169854 | Hemiplegia and hemiparesis following other cerebrovascular disease affecting left non-dominant side  |
|  | 169859 | Hemiplegia and hemiparesis following other cerebrovascular disease affecting unspecified side        |
|  | 16986  | Other paralytic syndrome following other cerebrovascular disease                                     |
|  | 169861 | Other paralytic syndrome following other cerebrovascular disease affecting right dominant side       |
|  | 169862 | Other paralytic syndrome following other cerebrovascular disease affecting left dominant side        |
|  | 169863 | Other paralytic syndrome following other cerebrovascular disease affecting right non-dominant side   |
|  | 169864 | Other paralytic syndrome following other cerebrovascular disease affecting left non-dominant side    |
|  | 169865 | Other paralytic syndrome following other cerebrovascular disease, bilateral                          |
|  | 169869 | Other paralytic syndrome following other cerebrovascular disease affecting unspecified side          |
|  | 16989  | Other sequelae of other cerebrovascular disease                                                      |
|  | 169890 | Apraxia following other cerebrovascular disease                                                      |
|  | 169891 | Dysphagia following other cerebrovascular disease                                                    |
|  | 169892 | Facial weakness following other cerebrovascular disease                                              |
|  | 169893 | Ataxia following other cerebrovascular disease                                                       |
|  | 169898 | Other sequelae of other cerebrovascular disease                                                      |
|  | 1699   | Sequelae of unspecified cerebrovascular diseases                                                     |
|  | 16990  | Unspecified sequelae of unspecified cerebrovascular disease                                          |
|  | 16991  | Cognitive deficits following unspecified cerebrovascular disease                                     |
|  | 16992  | Speech and language deficits following unspecified cerebrovascular disease                           |
|  | 169920 | Aphasia following unspecified cerebrovascular disease                                                |
|  | 169921 | Dysphasia following unspecified cerebrovascular disease                                              |
|  | 169922 | Dysarthria following unspecified cerebrovascular disease                                             |
|  | 169923 | Fluency disorder following unspecified cerebrovascular disease                                       |

|  |        |                                                                                                            |
|--|--------|------------------------------------------------------------------------------------------------------------|
|  | 169928 | Other speech and language deficits following unspecified cerebrovascular disease                           |
|  | 16993  | Monoplegia of upper limb following unspecified cerebrovascular disease                                     |
|  | 169931 | Monoplegia of upper limb following unspecified cerebrovascular disease affecting right dominant side       |
|  | 169932 | Monoplegia of upper limb following unspecified cerebrovascular disease affecting left dominant side        |
|  | 169933 | Monoplegia of upper limb following unspecified cerebrovascular disease affecting right non-dominant side   |
|  | 169934 | Monoplegia of upper limb following unspecified cerebrovascular disease affecting left non-dominant side    |
|  | 169939 | Monoplegia of upper limb following unspecified cerebrovascular disease affecting unspecified side          |
|  | 16994  | Monoplegia of lower limb following unspecified cerebrovascular disease                                     |
|  | 169941 | Monoplegia of lower limb following unspecified cerebrovascular disease affecting right dominant side       |
|  | 169942 | Monoplegia of lower limb following unspecified cerebrovascular disease affecting left dominant side        |
|  | 169943 | Monoplegia of lower limb following unspecified cerebrovascular disease affecting right non-dominant side   |
|  | 169944 | Monoplegia of lower limb following unspecified cerebrovascular disease affecting left non-dominant side    |
|  | 169949 | Monoplegia of lower limb following unspecified cerebrovascular disease affecting unspecified side          |
|  | 16995  | Hemiplegia and hemiparesis following unspecified cerebrovascular disease                                   |
|  | 169951 | Hemiplegia and hemiparesis following unspecified cerebrovascular disease affecting right dominant side     |
|  | 169952 | Hemiplegia and hemiparesis following unspecified cerebrovascular disease affecting left dominant side      |
|  | 169953 | Hemiplegia and hemiparesis following unspecified cerebrovascular disease affecting right non-dominant side |
|  | 169954 | Hemiplegia and hemiparesis following unspecified cerebrovascular disease affecting left non-dominant side  |
|  | 169959 | Hemiplegia and hemiparesis following unspecified cerebrovascular disease affecting unspecified side        |
|  | 16996  | Other paralytic syndrome following unspecified cerebrovascular disease                                     |
|  | 169961 | Other paralytic syndrome following unspecified cerebrovascular disease affecting right dominant side       |

|                             |        |                                                                                                          |
|-----------------------------|--------|----------------------------------------------------------------------------------------------------------|
|                             | I69962 | Other paralytic syndrome following unspecified cerebrovascular disease affecting left dominant side      |
|                             | I69963 | Other paralytic syndrome following unspecified cerebrovascular disease affecting right non-dominant side |
|                             | I69964 | Other paralytic syndrome following unspecified cerebrovascular disease affecting left non-dominant side  |
|                             | I69965 | Other paralytic syndrome following unspecified cerebrovascular disease, bilateral                        |
|                             | I69969 | Other paralytic syndrome following unspecified cerebrovascular disease affecting unspecified side        |
|                             | I6999  | Other sequelae of unspecified cerebrovascular disease                                                    |
|                             | I69990 | Apraxia following unspecified cerebrovascular disease                                                    |
|                             | I69991 | Dysphagia following unspecified cerebrovascular disease                                                  |
|                             | I69992 | Facial weakness following unspecified cerebrovascular disease                                            |
|                             | I69993 | Ataxia following unspecified cerebrovascular disease                                                     |
|                             | I69998 | Other sequelae following unspecified cerebrovascular disease                                             |
|                             | Z823   | Family history of stroke                                                                                 |
| Treatment of Hyperlipidemia | E753   | Sphingolipidosis, unspecified                                                                            |
|                             | E755   | Other lipid storage disorders                                                                            |
|                             | E756   | Lipid storage disorder, unspecified                                                                      |
|                             | E770   | Defects in post-translational modification of lysosomal enzymes                                          |
|                             | E778   | Other disorders of glycoprotein metabolism                                                               |
|                             | E779   | Disorder of glycoprotein metabolism, unspecified                                                         |
|                             | E78    | Disorders of lipoprotein metabolism and other lipidemias                                                 |
|                             | E780   | Pure hypercholesterolemia                                                                                |
|                             | E781   | Pure hyperglyceridemia                                                                                   |
|                             | E782   | Mixed hyperlipidemia                                                                                     |
|                             | E783   | Hyperchylomicronemia                                                                                     |
|                             | E784   | Other hyperlipidemia                                                                                     |
|                             | E785   | Hyperlipidemia, unspecified                                                                              |
|                             | E786   | Lipoprotein deficiency                                                                                   |
|                             | E787   | Disorders of bile acid and cholesterol metabolism                                                        |
|                             | E7870  | Disorder of bile acid and cholesterol metabolism, unspecified                                            |
|                             | E7871  | Barth syndrome                                                                                           |
|                             | E7872  | Smith-Lemli-Opitz syndrome                                                                               |
|                             | E7879  | Other disorders of bile acid and cholesterol metabolism                                                  |
|                             | E788   | Other disorders of lipoprotein metabolism                                                                |
|                             | E7881  | Lipoid dermatoarthritis                                                                                  |
|                             | E7889  | Other lipoprotein metabolism disorders                                                                   |
|                             | E789   | Disorder of lipoprotein metabolism, unspecified                                                          |
|                             | E881   | Lipodystrophy, not elsewhere classified                                                                  |
|                             | E8810  | Lipodystrophy, not elsewhere classified                                                                  |

|                           |       |                                                                    |
|---------------------------|-------|--------------------------------------------------------------------|
|                           | E8811 | Lipodystrophy, not elsewhere classified                            |
|                           | E882  | Lipomatosis, not elsewhere classified                              |
| Treatment of Hypertension | I10   | Essential (primary) hypertension                                   |
|                           | I100  | Essential (primary) hypertension                                   |
|                           | I15   | Secondary hypertension                                             |
|                           | I150  | Renovascular hypertension                                          |
|                           | I151  | Hypertension secondary to other renal disorders                    |
|                           | I152  | Hypertension secondary to endocrine disorders                      |
|                           | I158  | Other secondary hypertension                                       |
|                           | I159  | Secondary hypertension, unspecified                                |
|                           | I95   | Hypotension                                                        |
|                           | I958  | Other hypotension                                                  |
|                           | I9581 | Postprocedural hypotension                                         |
|                           | I9589 | Other hypotension                                                  |
|                           | I959  | Hypotension, unspecified                                           |
|                           | N262  | Page kidney                                                        |
|                           | R03   | Abnormal blood-pressure reading, without diagnosis                 |
|                           | R030  | Elevated blood-pressure reading, without diagnosis of hypertension |
|                           | R031  | Nonspecific low blood-pressure reading                             |
|                           | Z136  | Encounter for screening for cardiovascular disorders               |



# SUPPLEMENTAL FIGURES

**Supplemental Figure I: Changes in spending on atrial fibrillation/flutter from 1996 to 2016 associated with drivers, disaggregated by type of care**

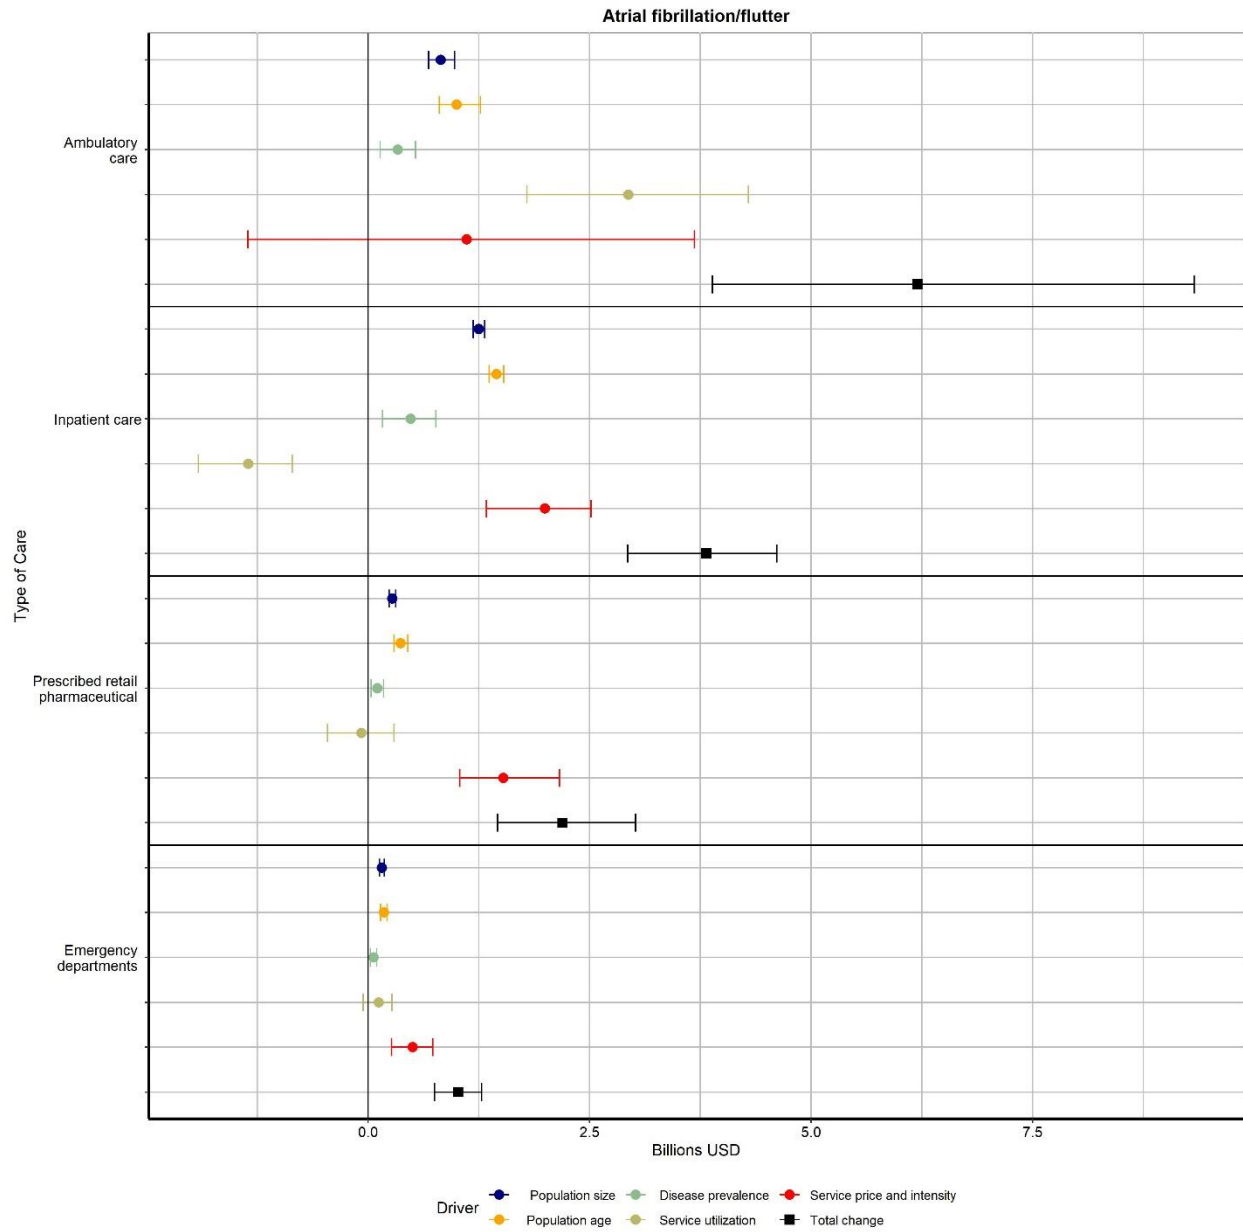

**Supplemental Figure II: Changes in spending on endocarditis from 1996 to 2016 associated with drivers, disaggregated by type of care**

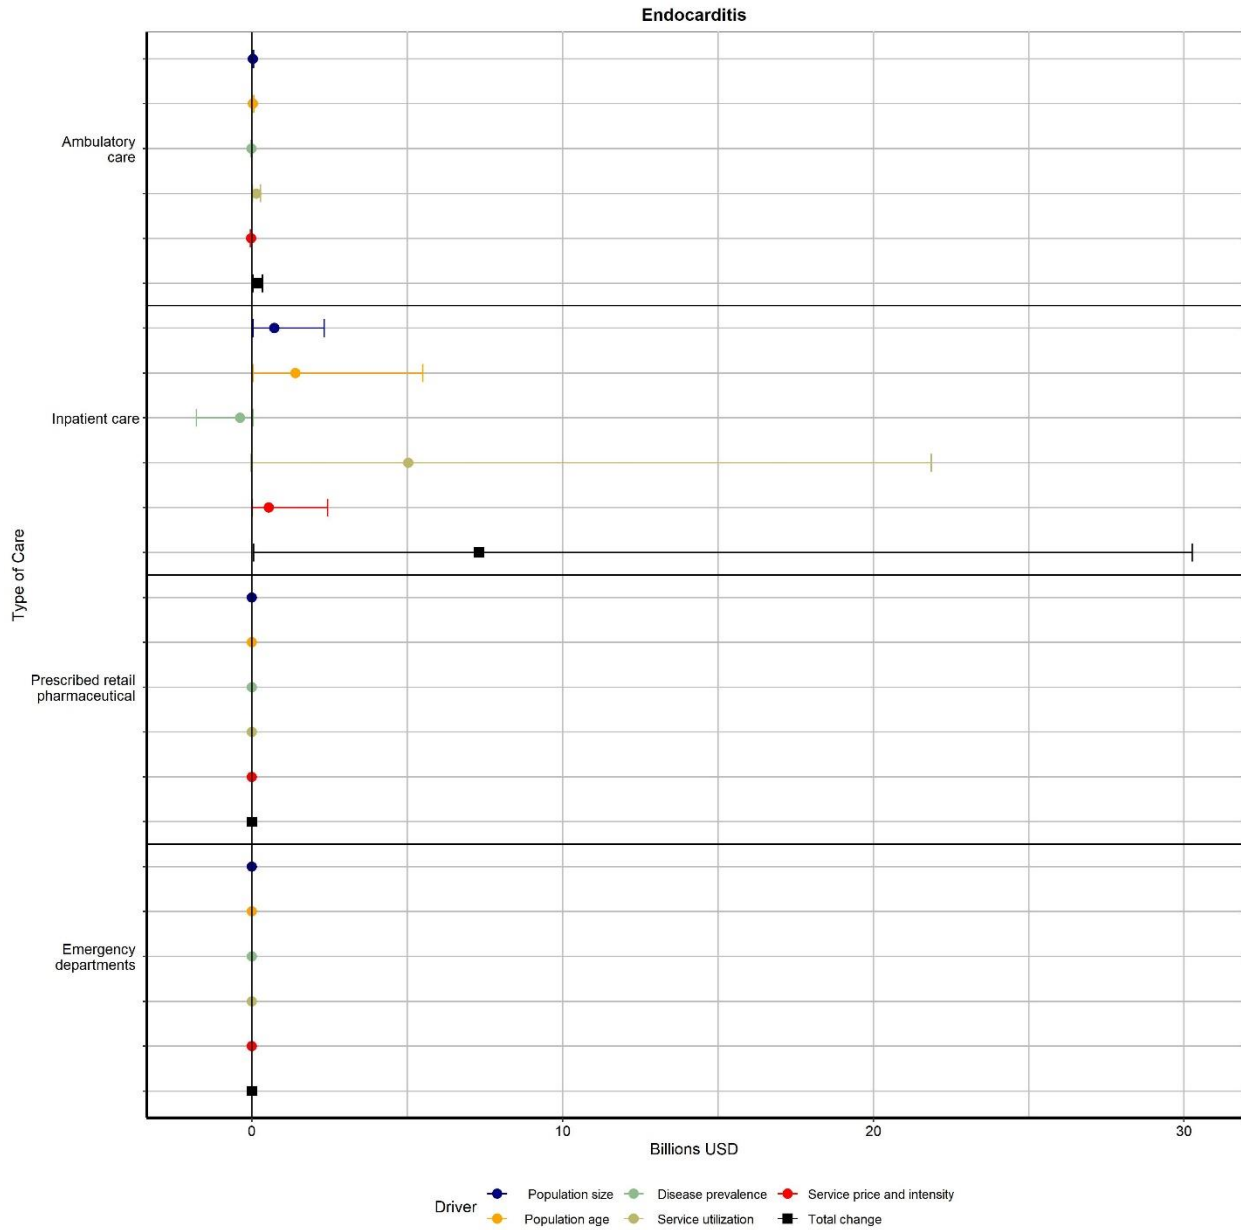

**Supplemental Figure III: Changes in spending on heart failure from 1996 to 2016 associated with drivers, disaggregated by type of care**

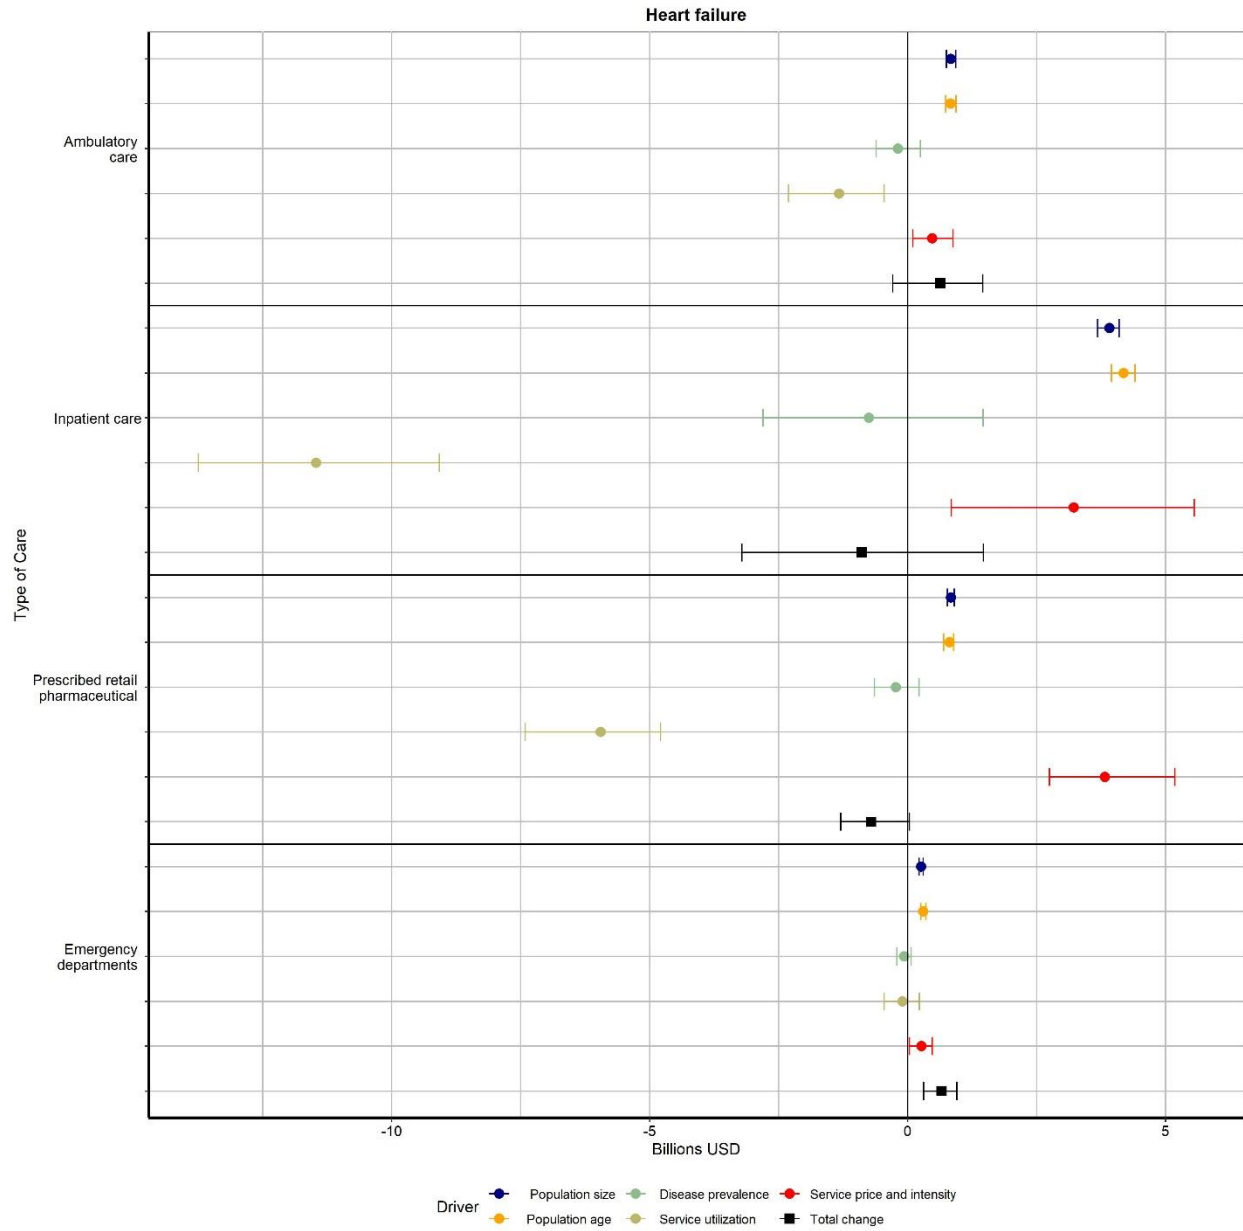

**Supplemental Figure IV: Changes in spending on ischemic heart disease from 1996 to 2016 associated with drivers, disaggregated by type of care**

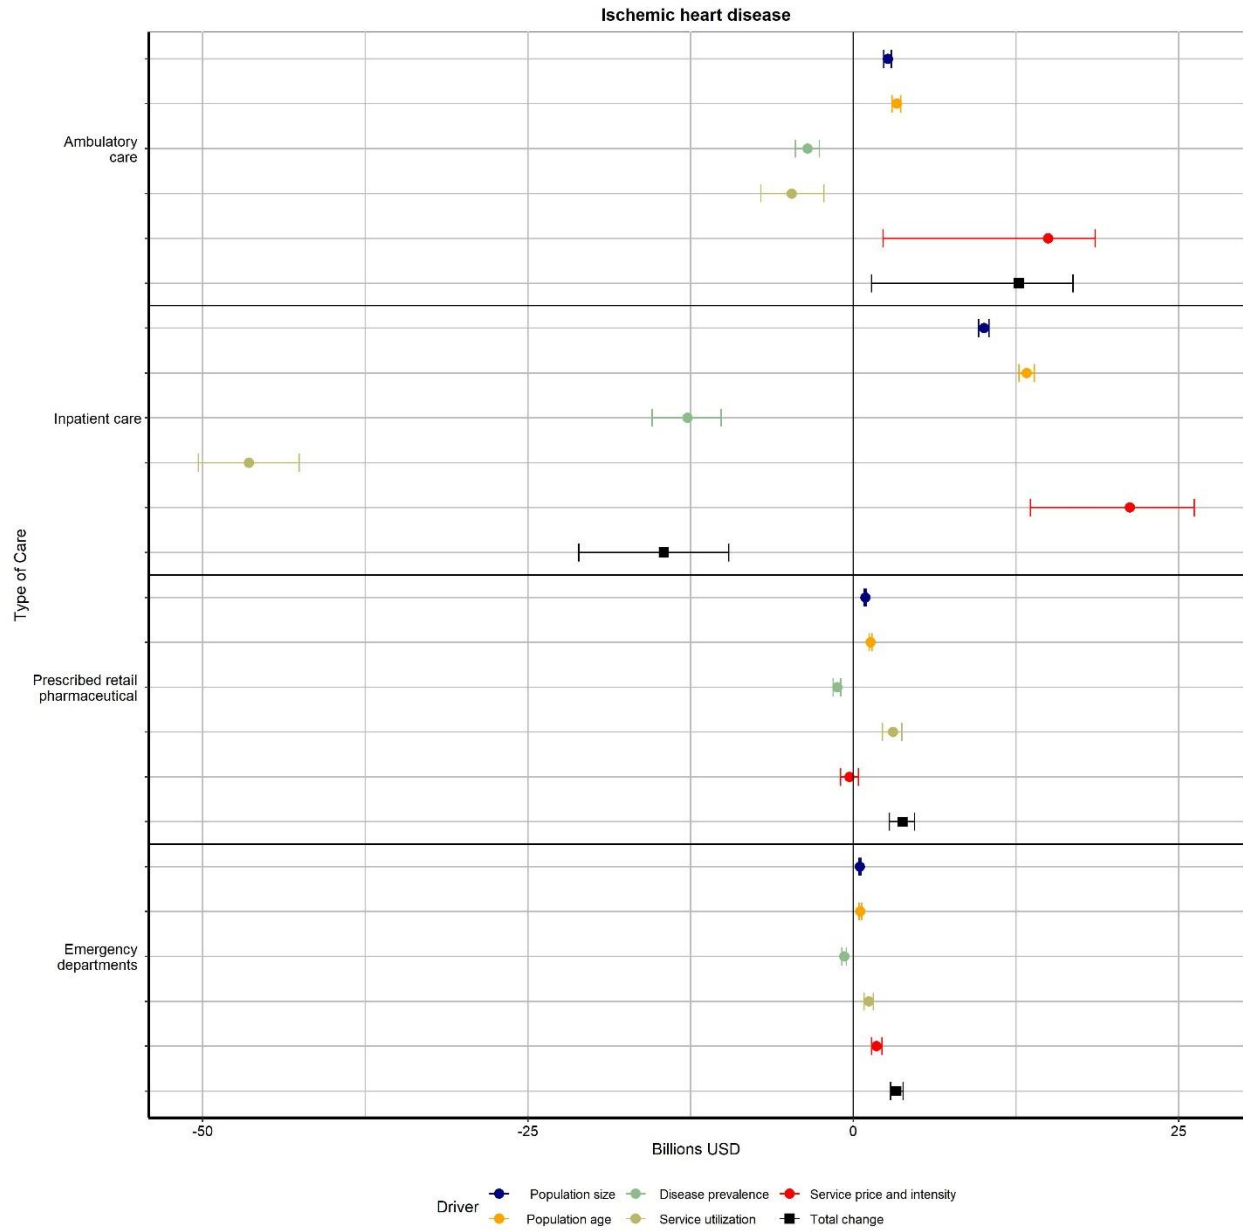

**Supplemental Figure V: Changes in spending on other heart disease from 1996 to 2016 associated with drivers, disaggregated by type of care**

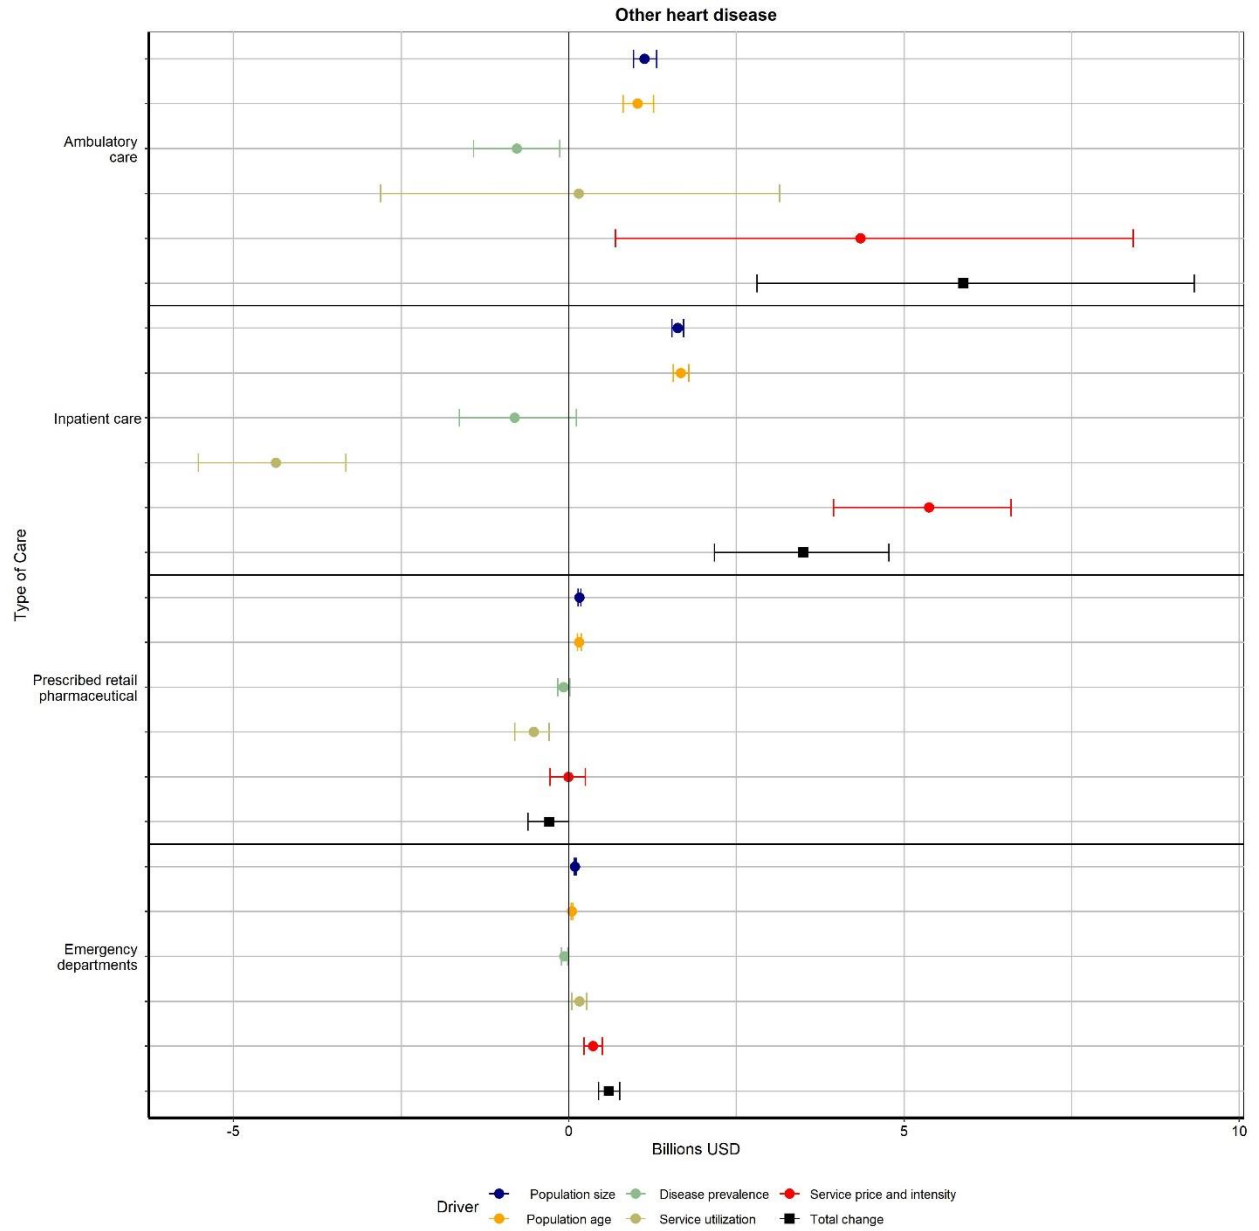

**Supplemental Figure VI: Changes in spending on peripheral arterial disease from 1996 to 2016 associated with drivers, disaggregated by type of care**

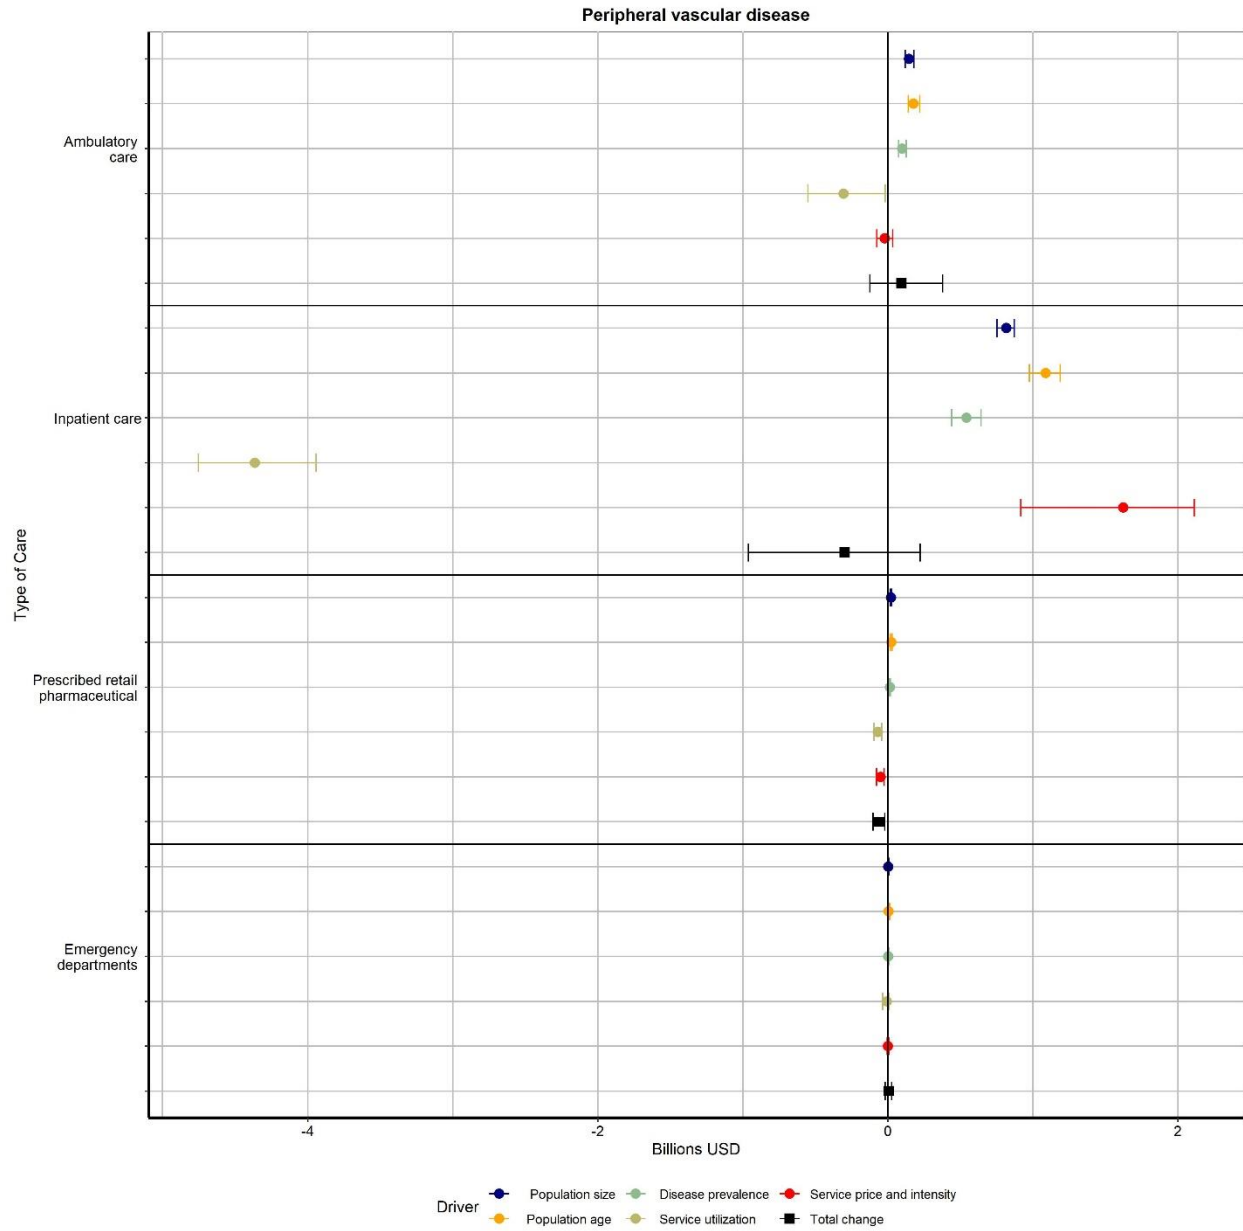

**Supplemental Figure VII: Changes in spending on rheumatic heart disease from 1996 to 2016 associated with drivers, disaggregated by type of care**

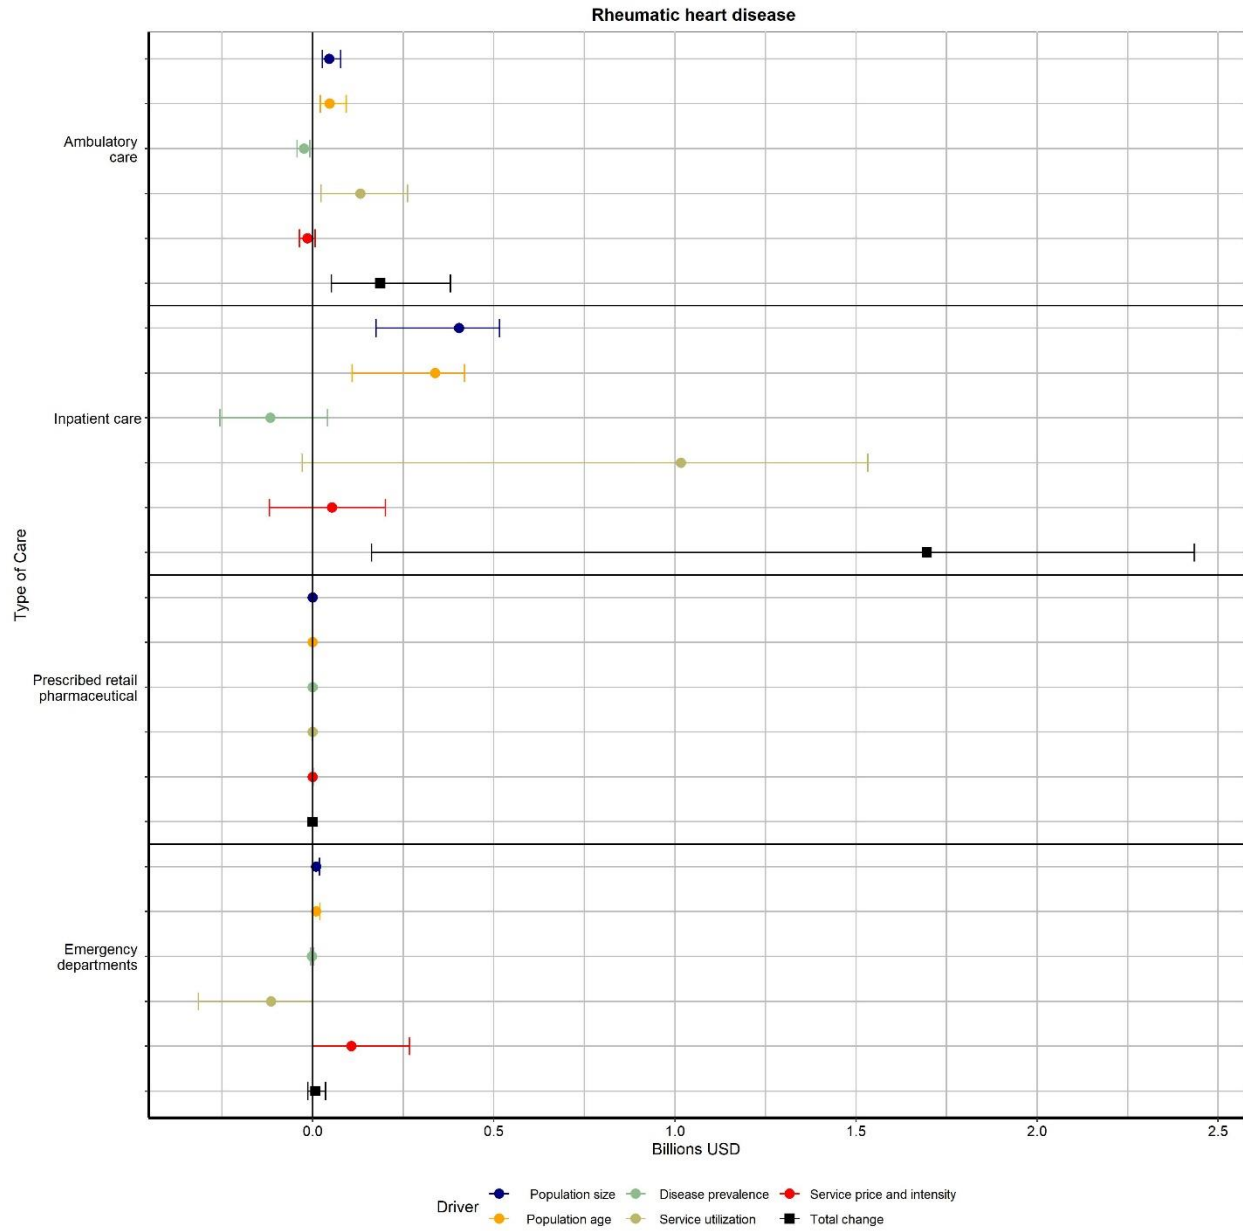

**Supplemental Figure VIII: Changes in spending on cerebrovascular disease from 1996 to 2016 associated with drivers, disaggregated by type of care**

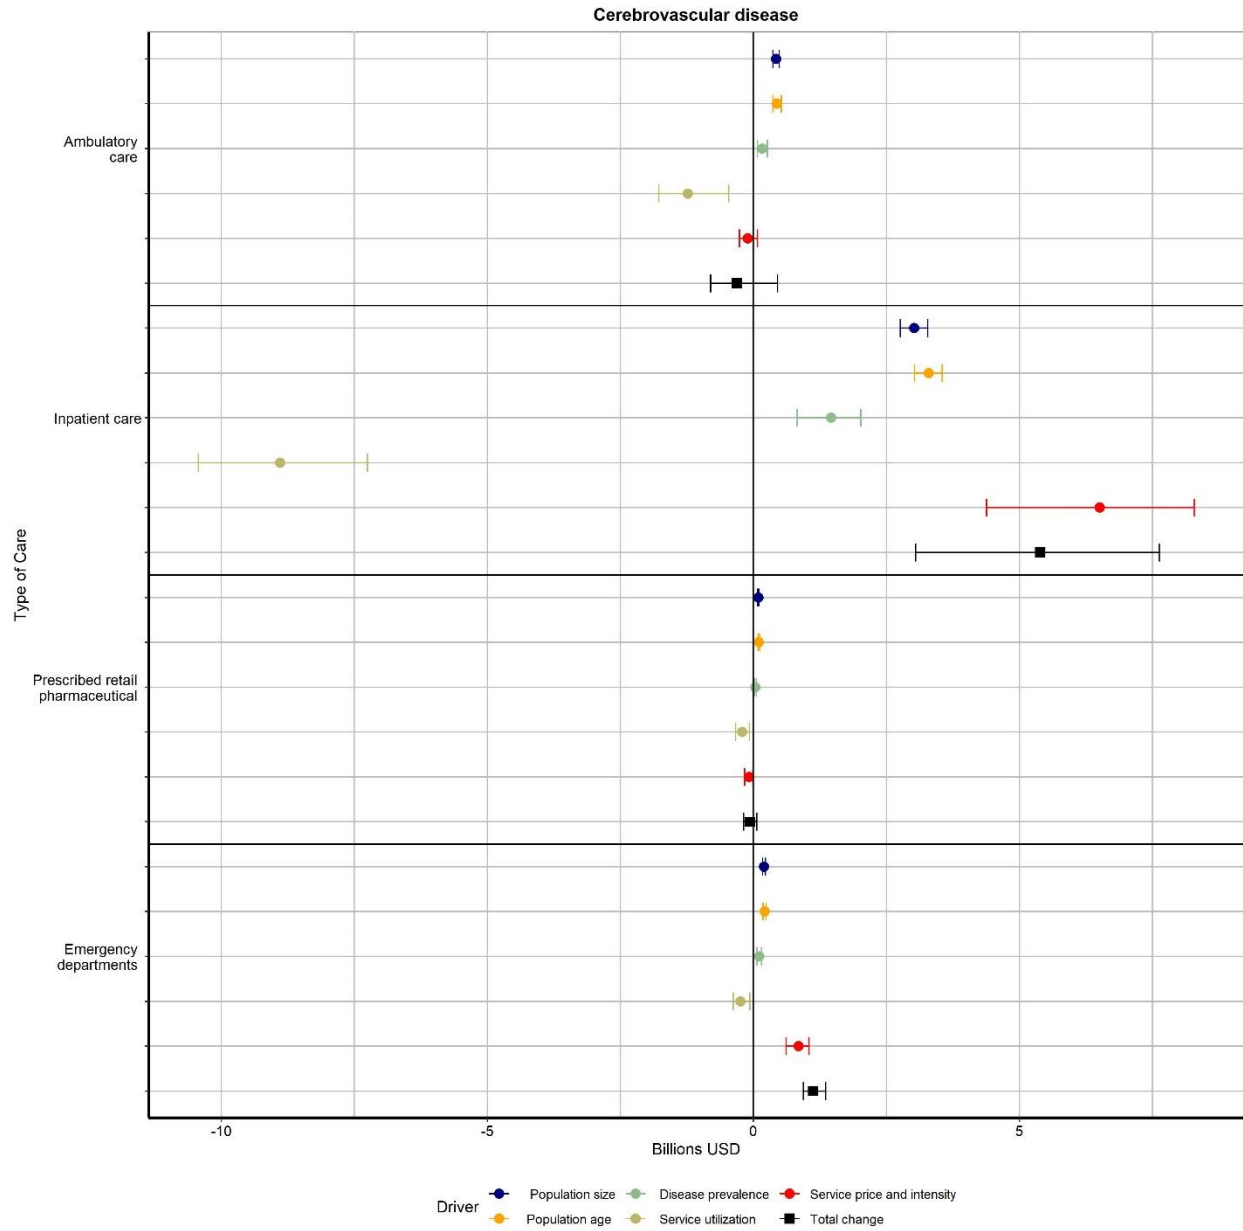



**Supplemental Figure IX: Changes in spending on hyperlipidemia from 1996 to 2016 associated with drivers, disaggregated by type of care**

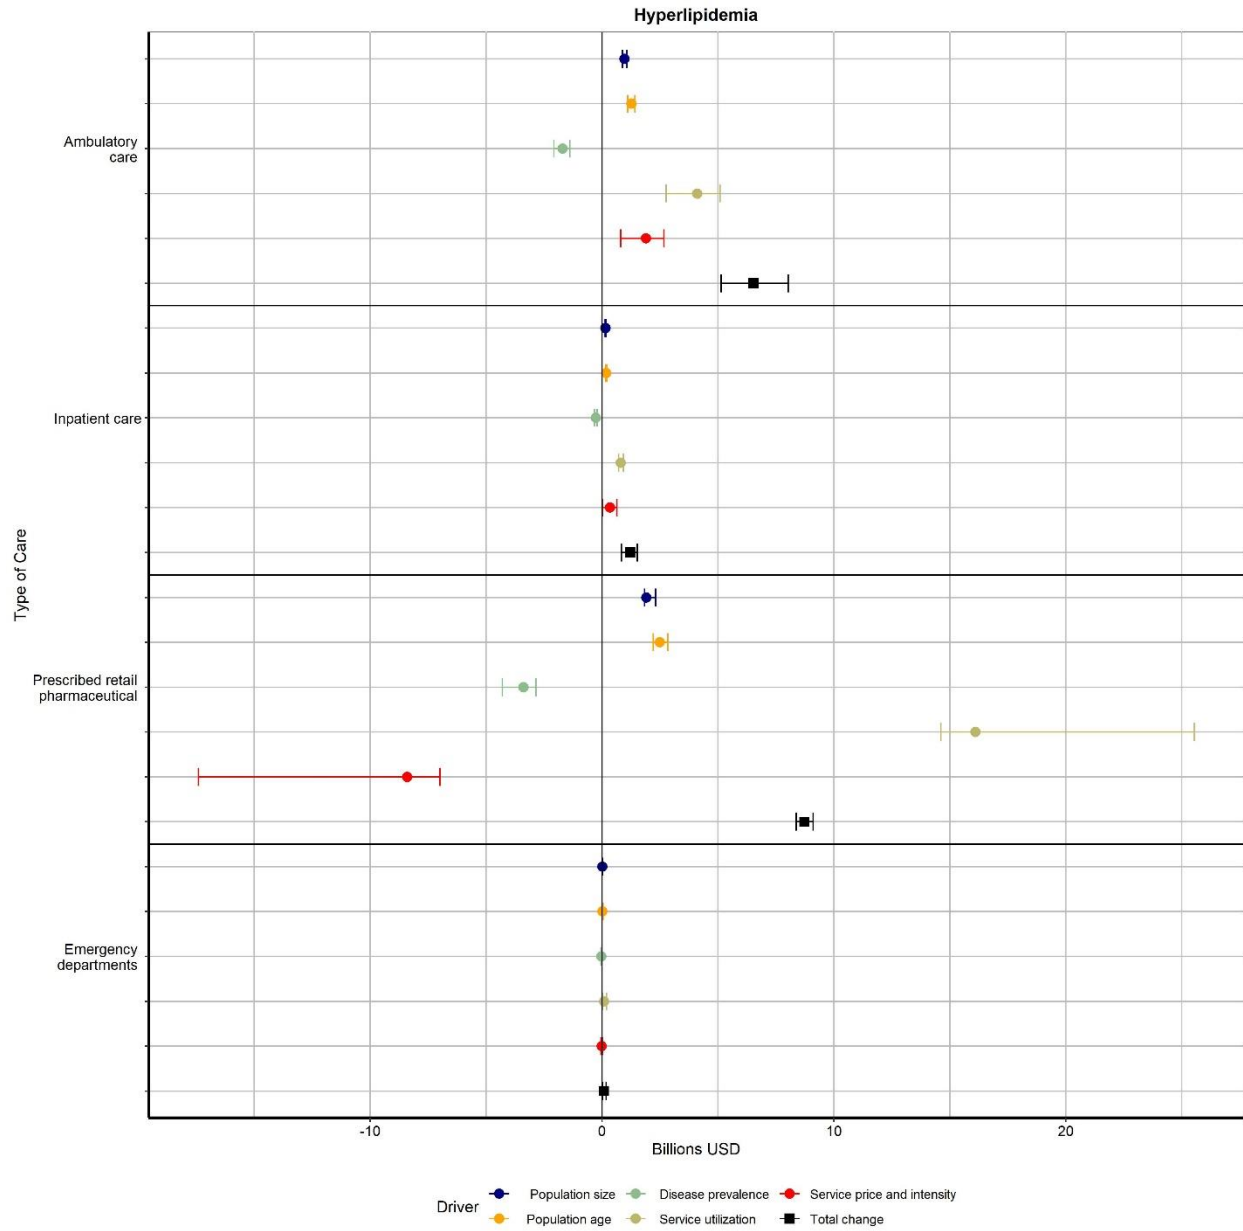

**Supplemental Figure X: Changes in spending on hypertension from 1996 to 2016 associated with drivers, disaggregated by type of care**

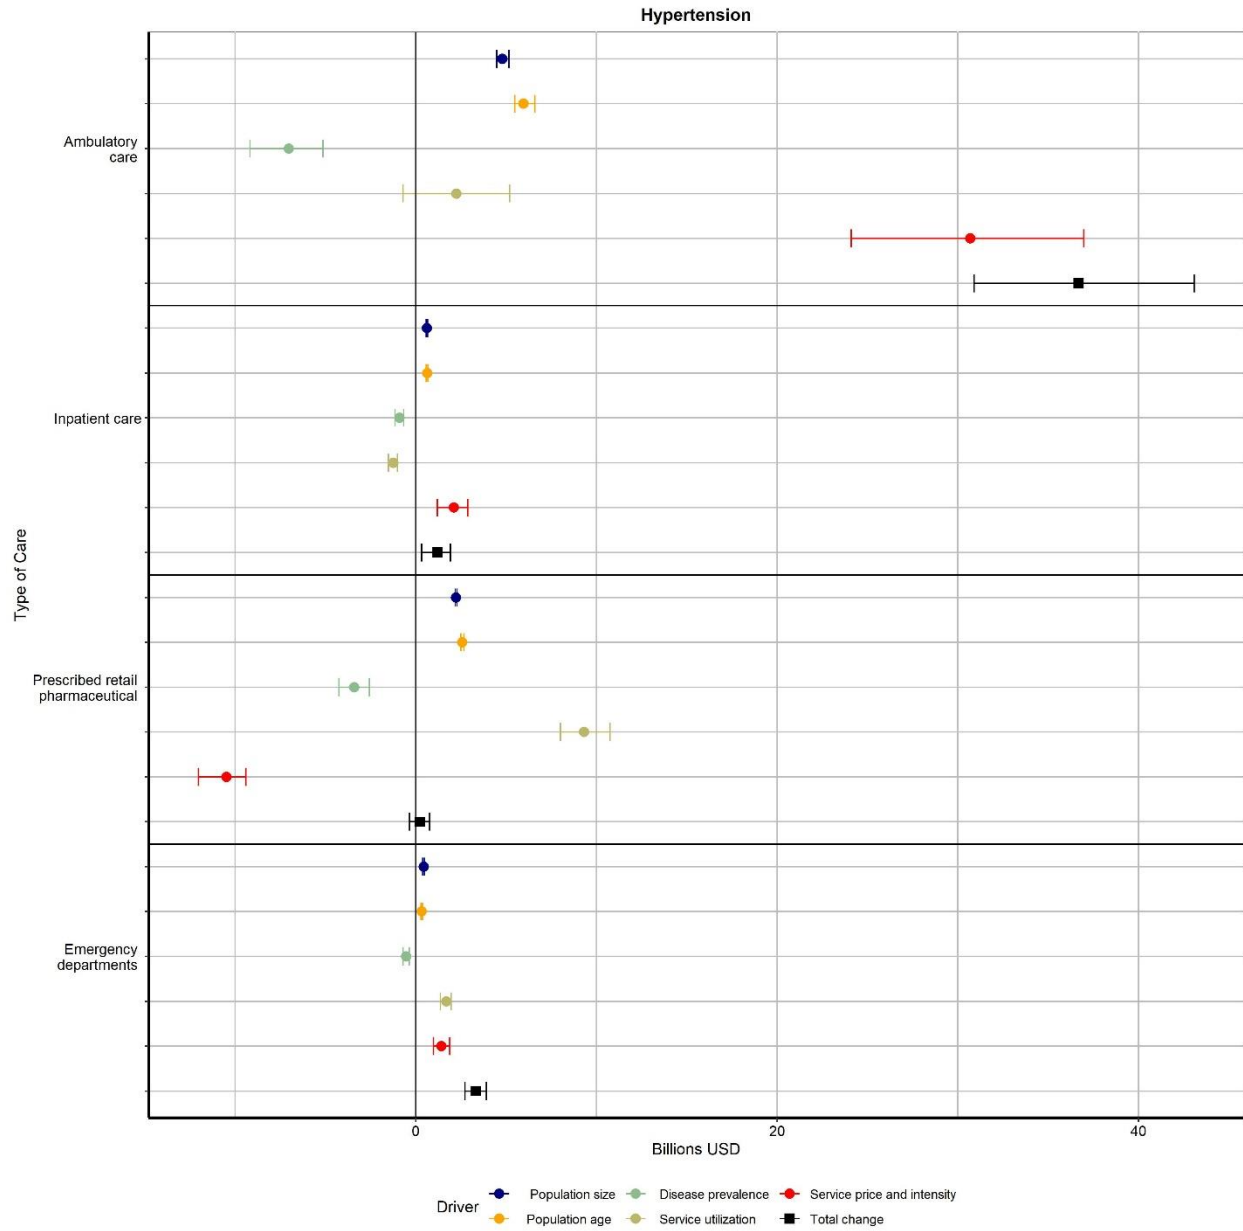

Supplement: NIHMS1713335-supplement-Supplemental_Publication_Material.pdf [file NIHMS1713335-supplement-Supplemental_Publication_Material.pdf]
